# Supplementary material
Source: publisher figshare collection journal article supplement (https://acs.figshare.com/ndownloader/files/25559795)

# **Expeditious Access to Spiro-fused 2,5-Cyclohexadienones via Thio(seleno)cyanative *ipso*-Cyclization**

Chada Raji Reddy,<sup>\*,a,b</sup> Uprety Ajaykumar<sup>a,b</sup> and Dattahari H. Kolgave<sup>a,b</sup>

<sup>a</sup>Department of Organic Synthesis & Process Chemistry

CSIR-Indian Institute of Chemical Technology (CSIR-IICT), Hyderabad 500007, India

<sup>b</sup>Academy of Scientific and Innovative Research (AcSIR), Ghaziabad 201002, India

E-mail: rajireddy@iict.res.in

## **Table of Contents**

|                                                                                                         |                                  |
|---------------------------------------------------------------------------------------------------------|----------------------------------|
| 2. Structures of propiolamides and propiolates.                                                         | S <sub>2</sub>                   |
| 3. Control Experiment - procedure                                                                       | S <sub>3</sub>                   |
| 3. <sup>1</sup> H NMR, <sup>13</sup> C NMR and <sup>19</sup> F NMR spectral copies of all new compounds | S <sub>4</sub> - S <sub>90</sub> |

## Structures of Starting materials: *N*-Propiolamides and *N*-propiolates

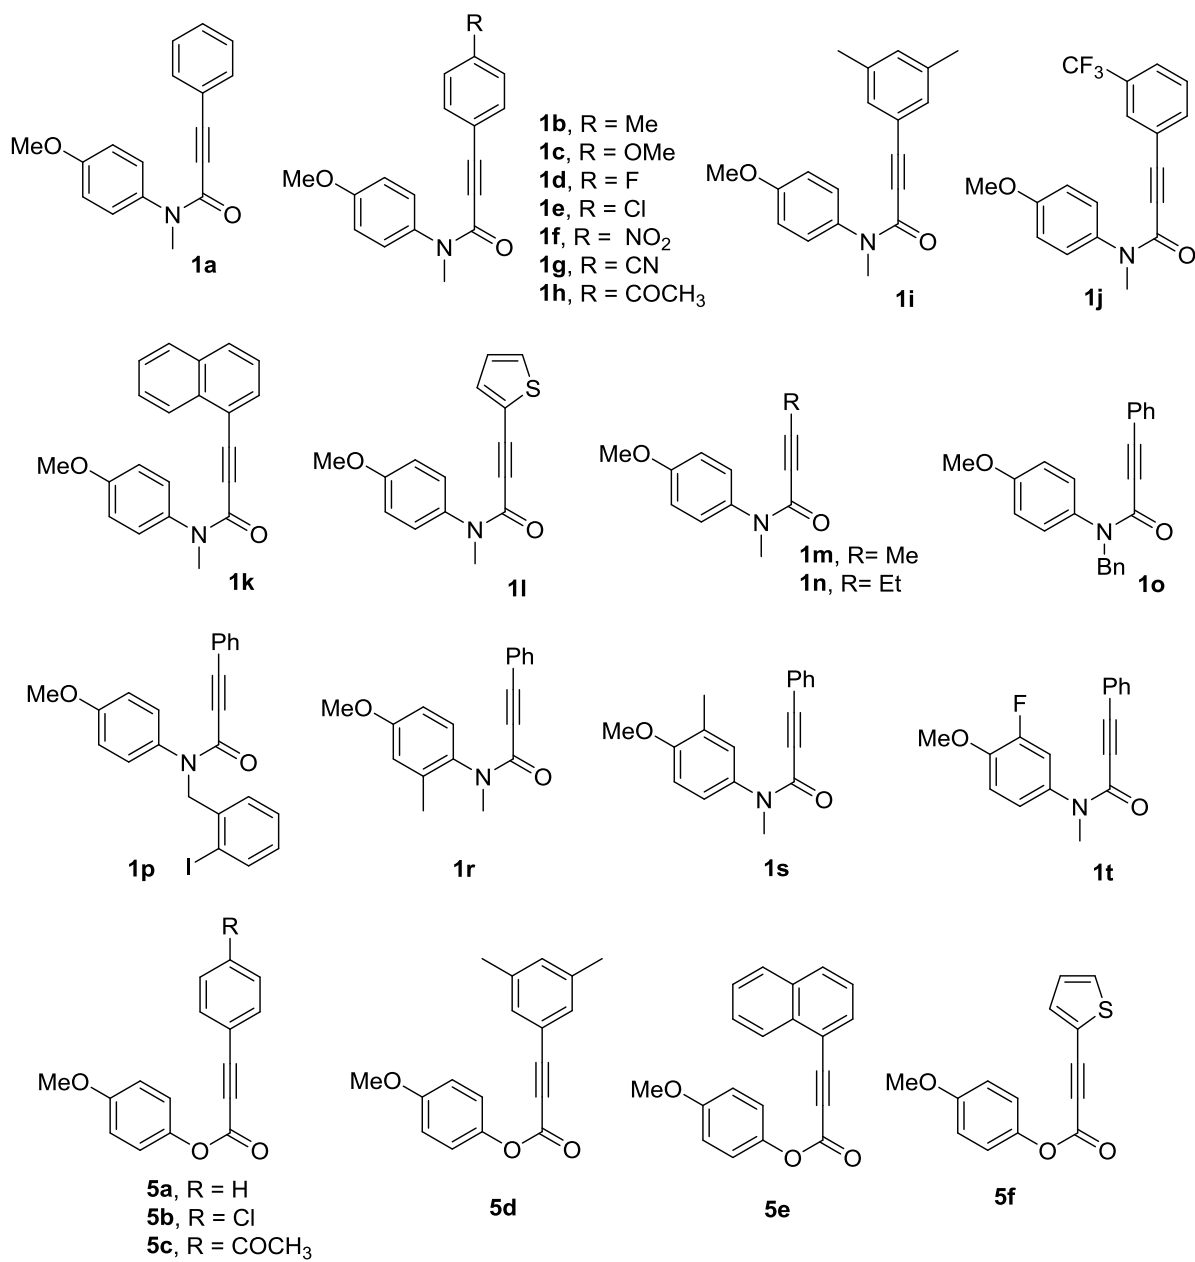

**Control Experiment with 2,2,6,6-tetramethylpiperidin-1-yl)oxidanyl (TEMPO):**

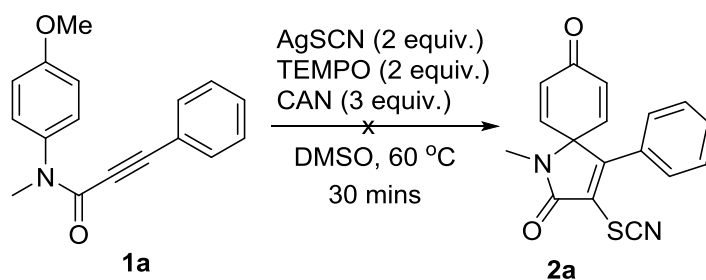

*N*-(4-Methoxyaryl)-propionamide **1a** (50 mg, 0.19 mmol), Silver thiocyanate (64 mg, 0.38 mmol), 2,2,6,6-tetramethylpiperidin-1-yl)oxidanyl (TEMPO) (59 mg, 0.38 mmol) and Ceric Ammonium Nitrate (308 mg, 0.57 mmol) were taken in a reaction vial and 3 mL of DMSO was added. The reaction mixture was stirred at 60 °C (oil bath temperature) for 30 minutes and the progress of the reaction as monitored by TLC was found to be inhibited.

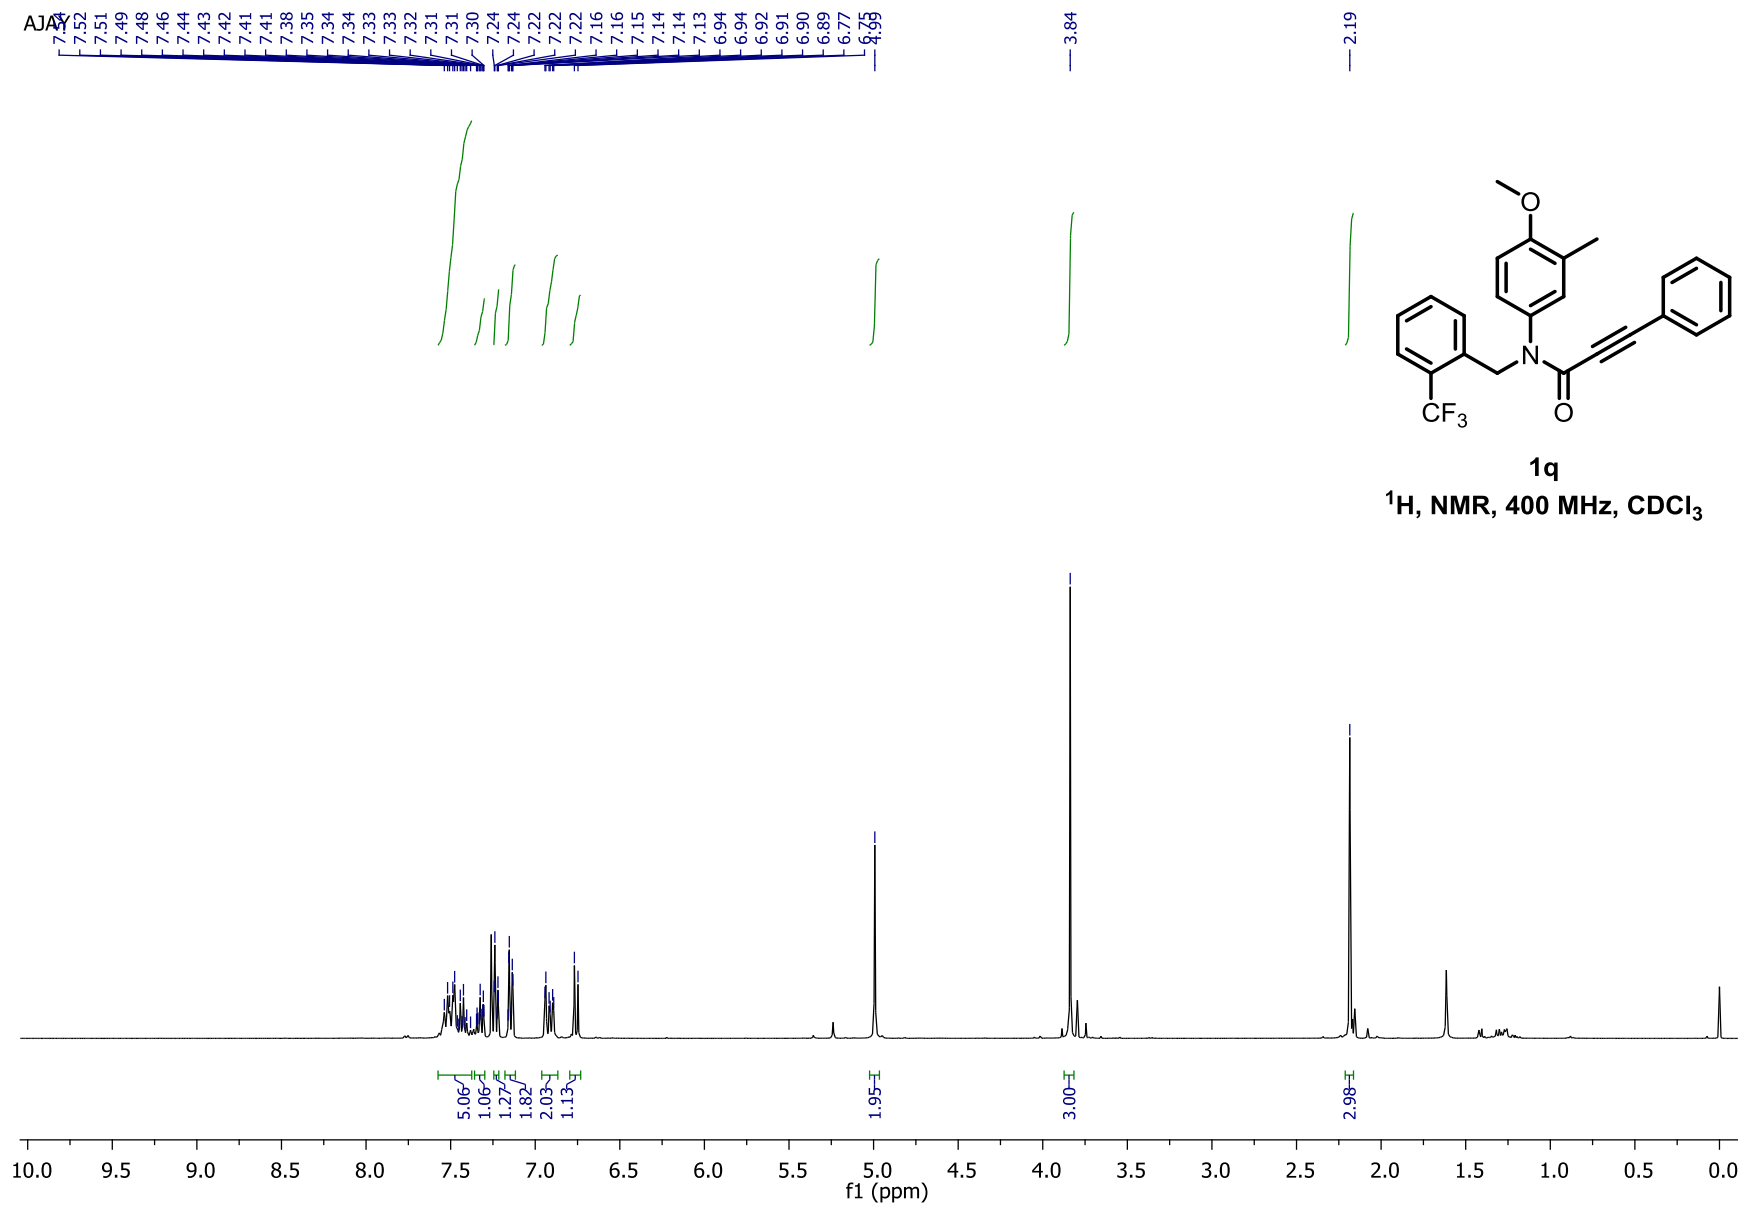

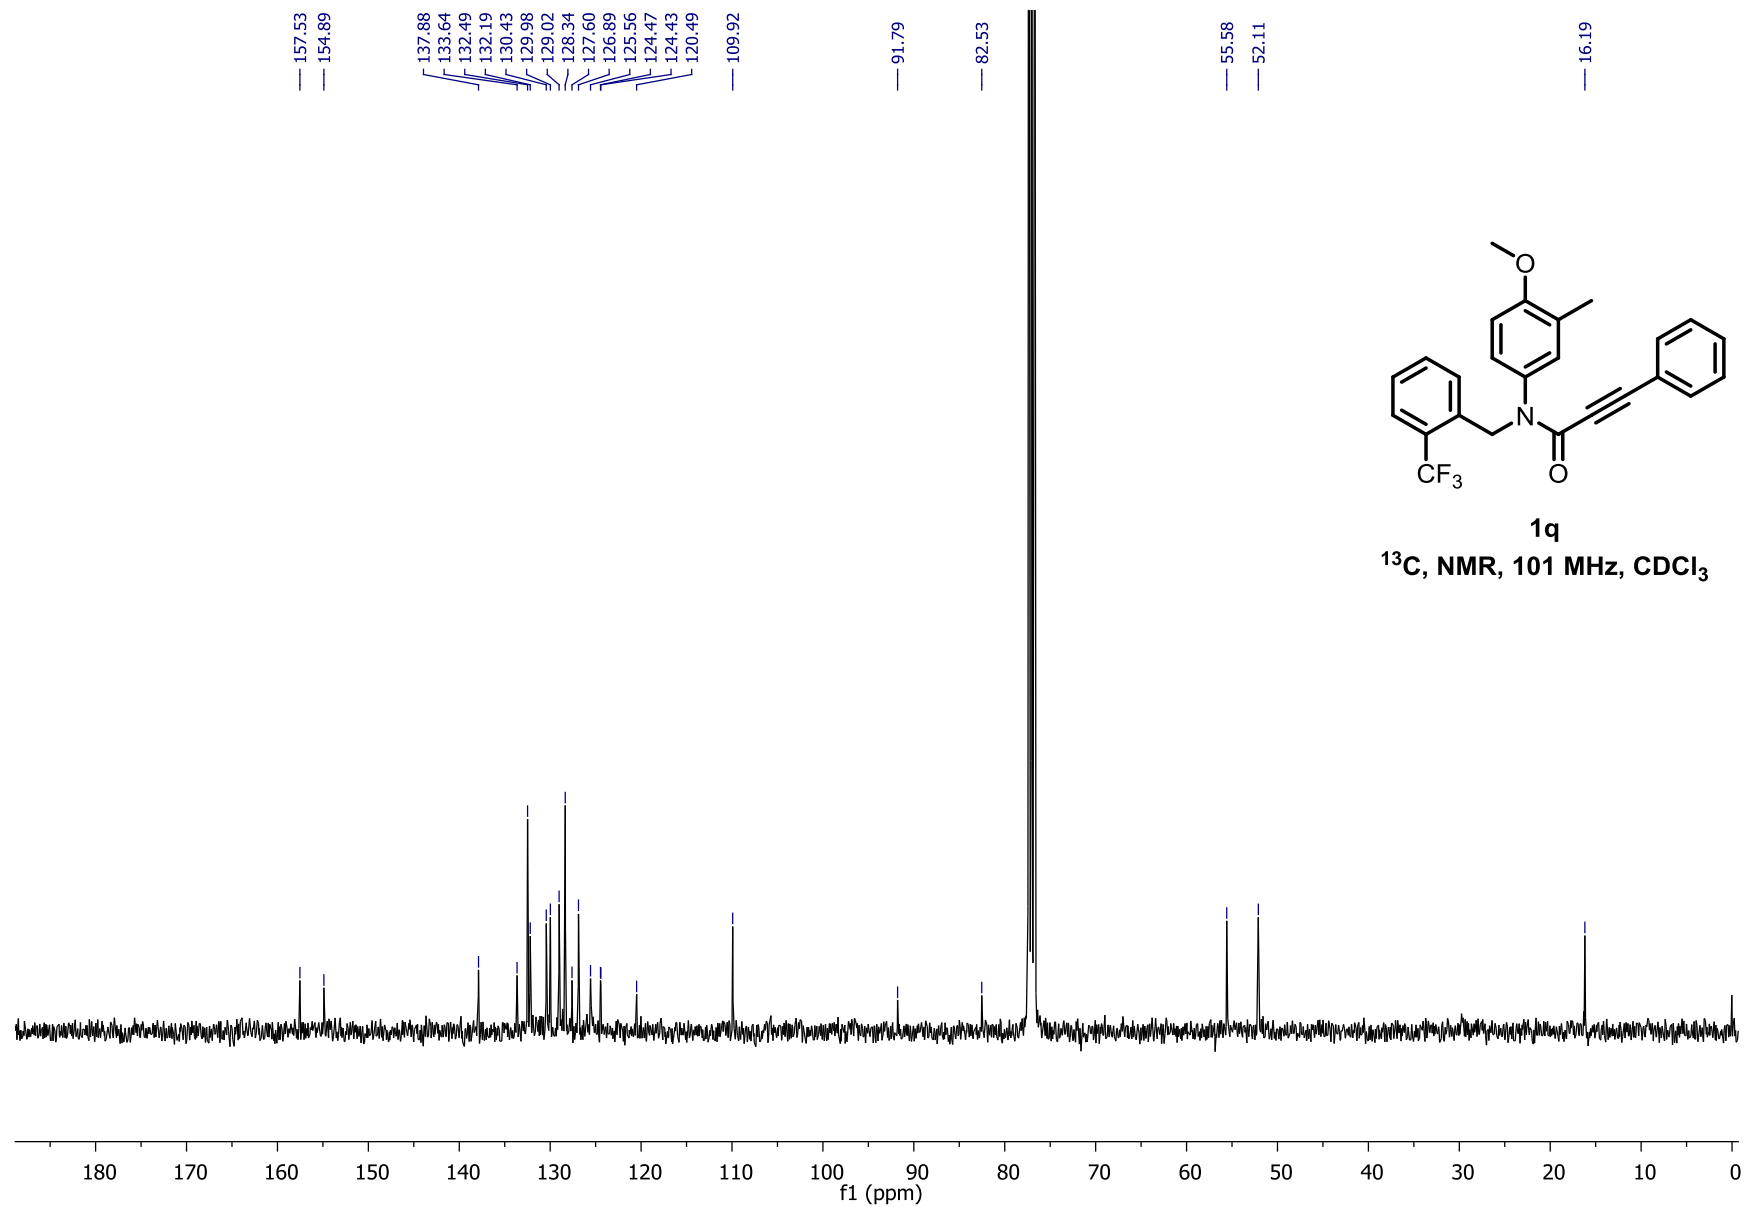

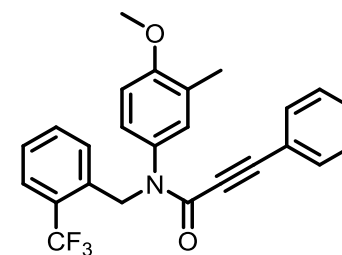

**1q**

**$^{19}\text{F}$ , NMR, 377 MHz,  $\text{CDCl}_3$**

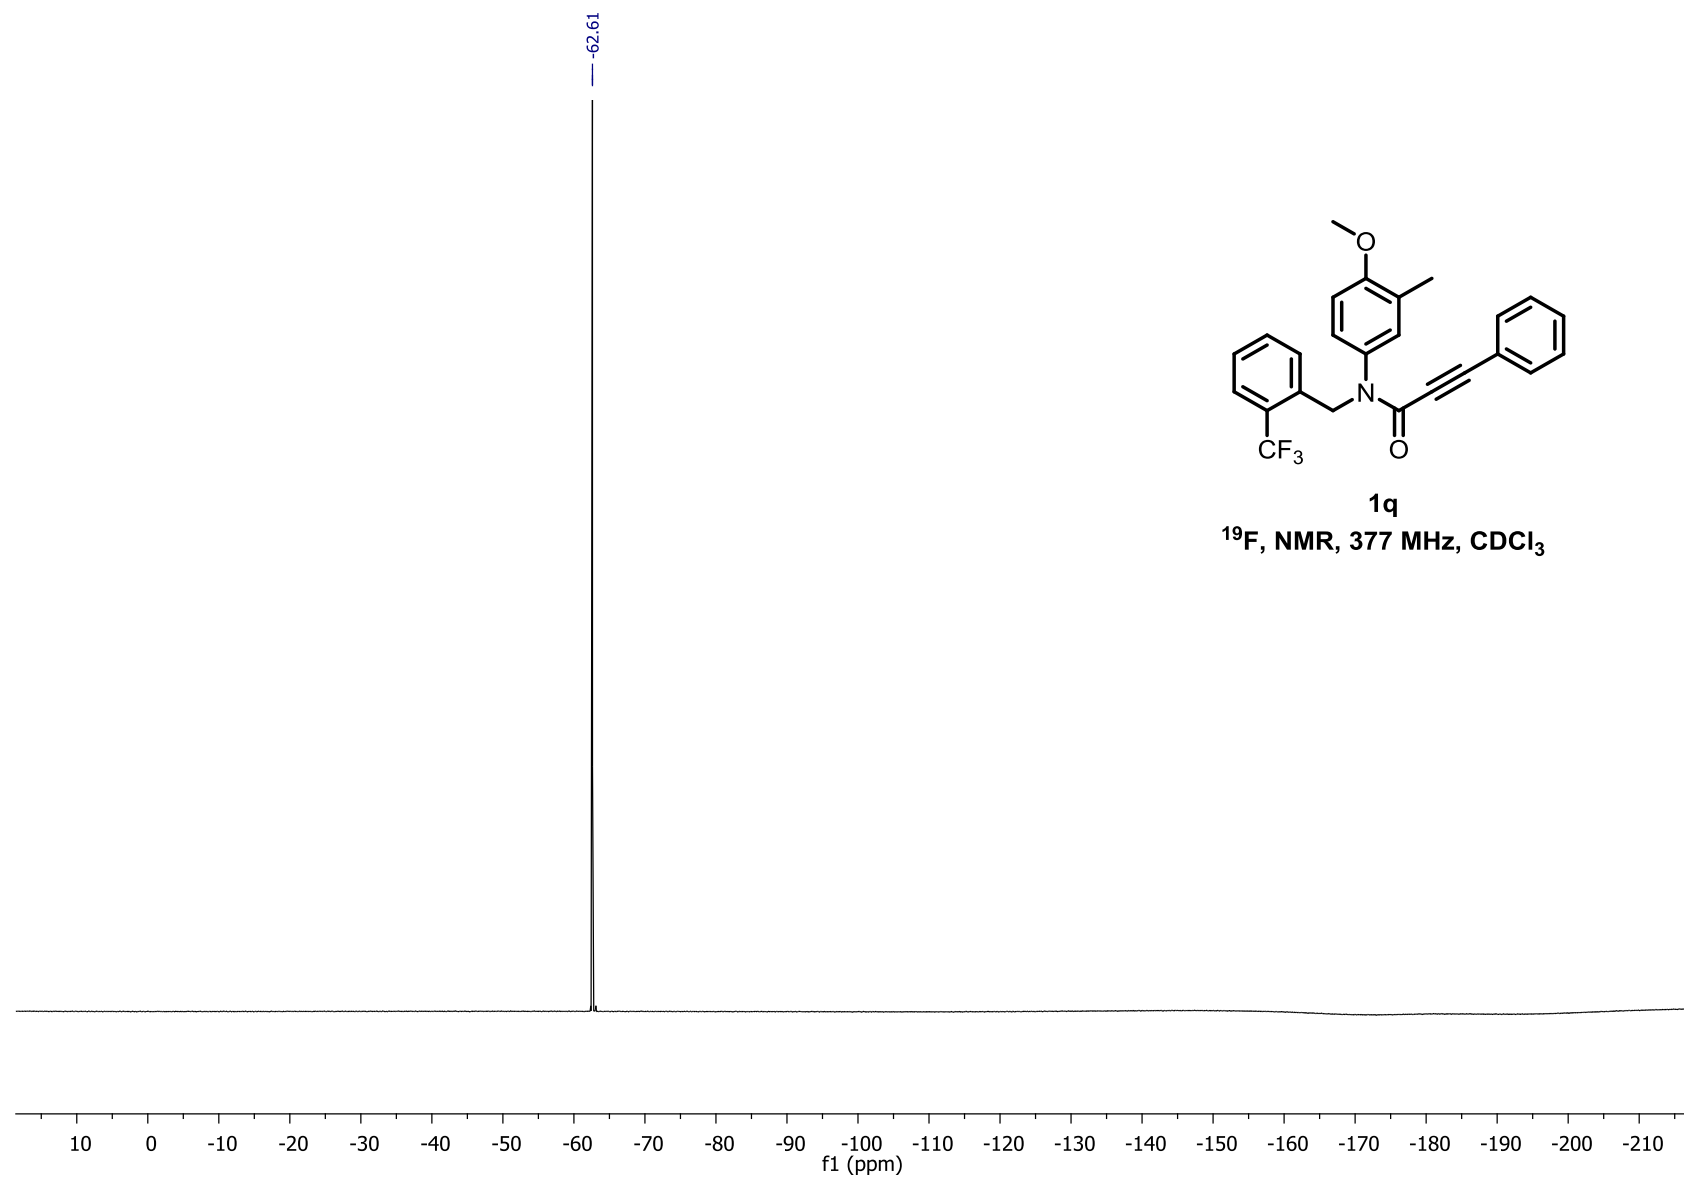

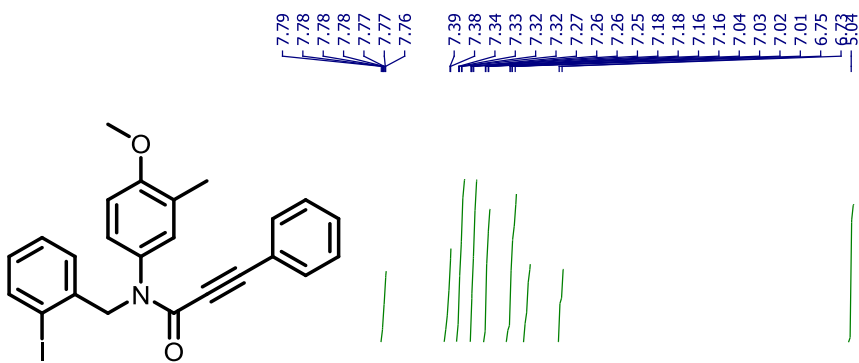

**1u**  
 $^1\text{H}$ , NMR, 500 MHz,  $\text{CDCl}_3$

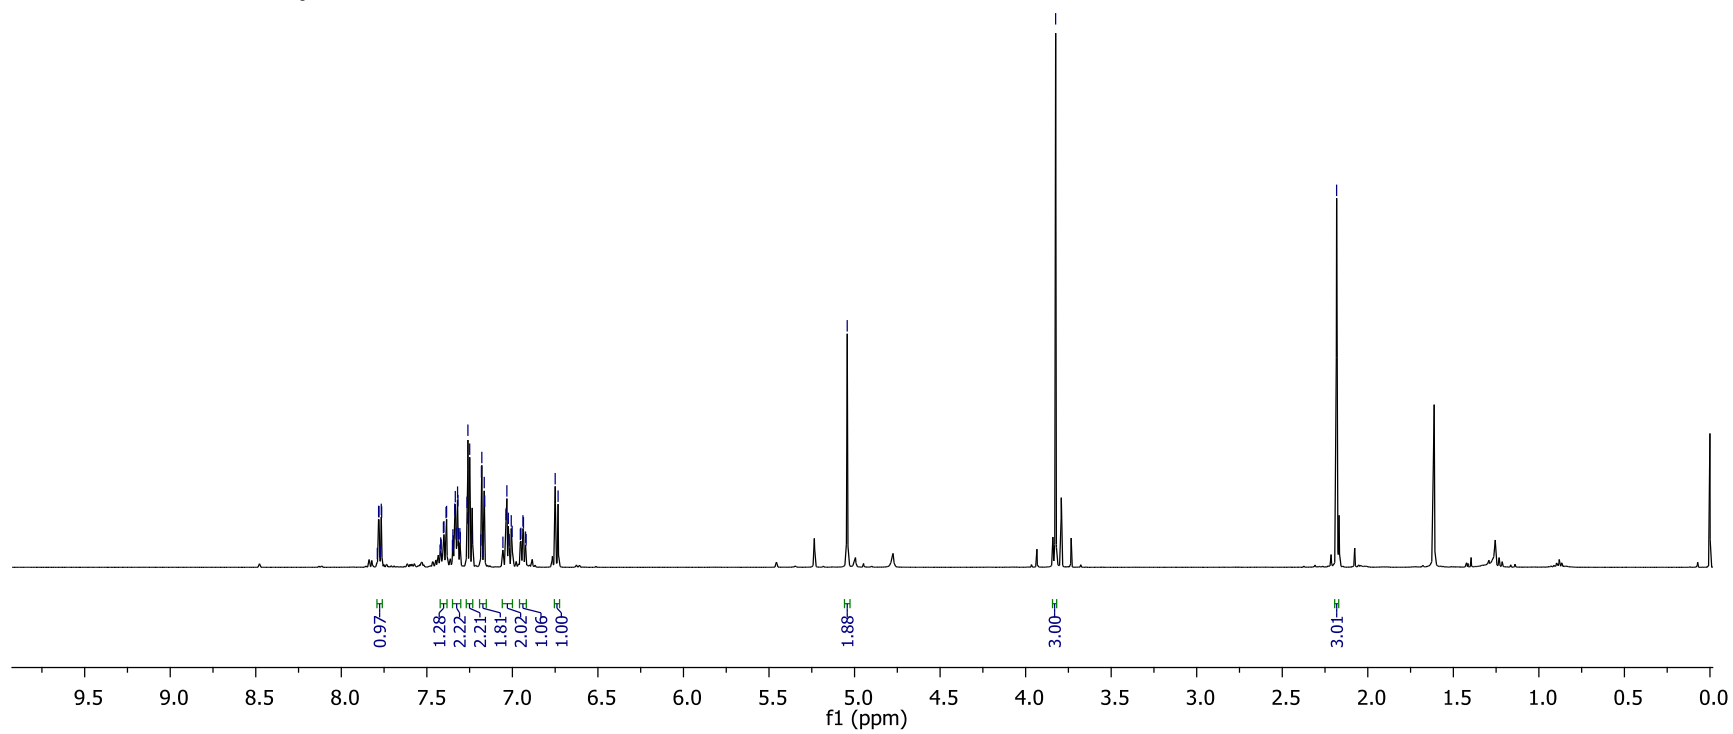

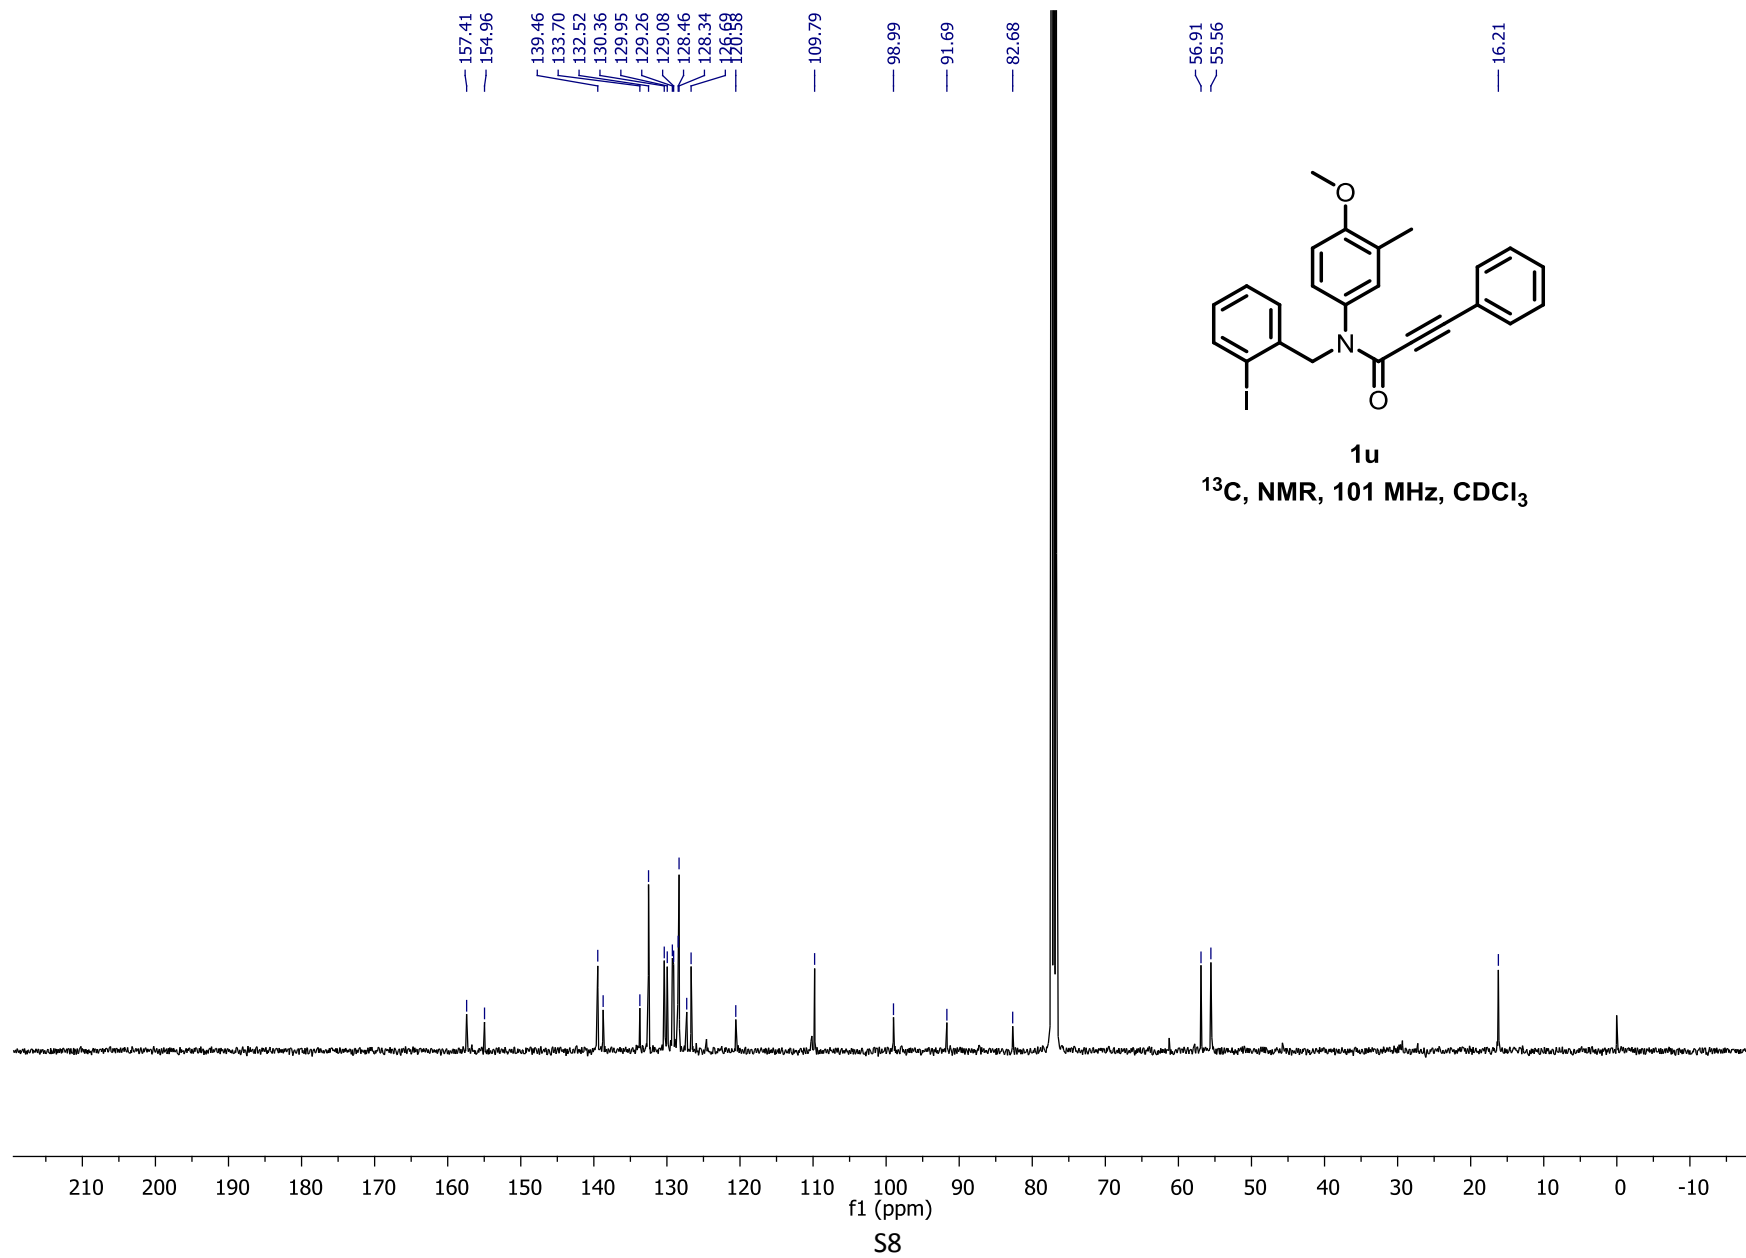



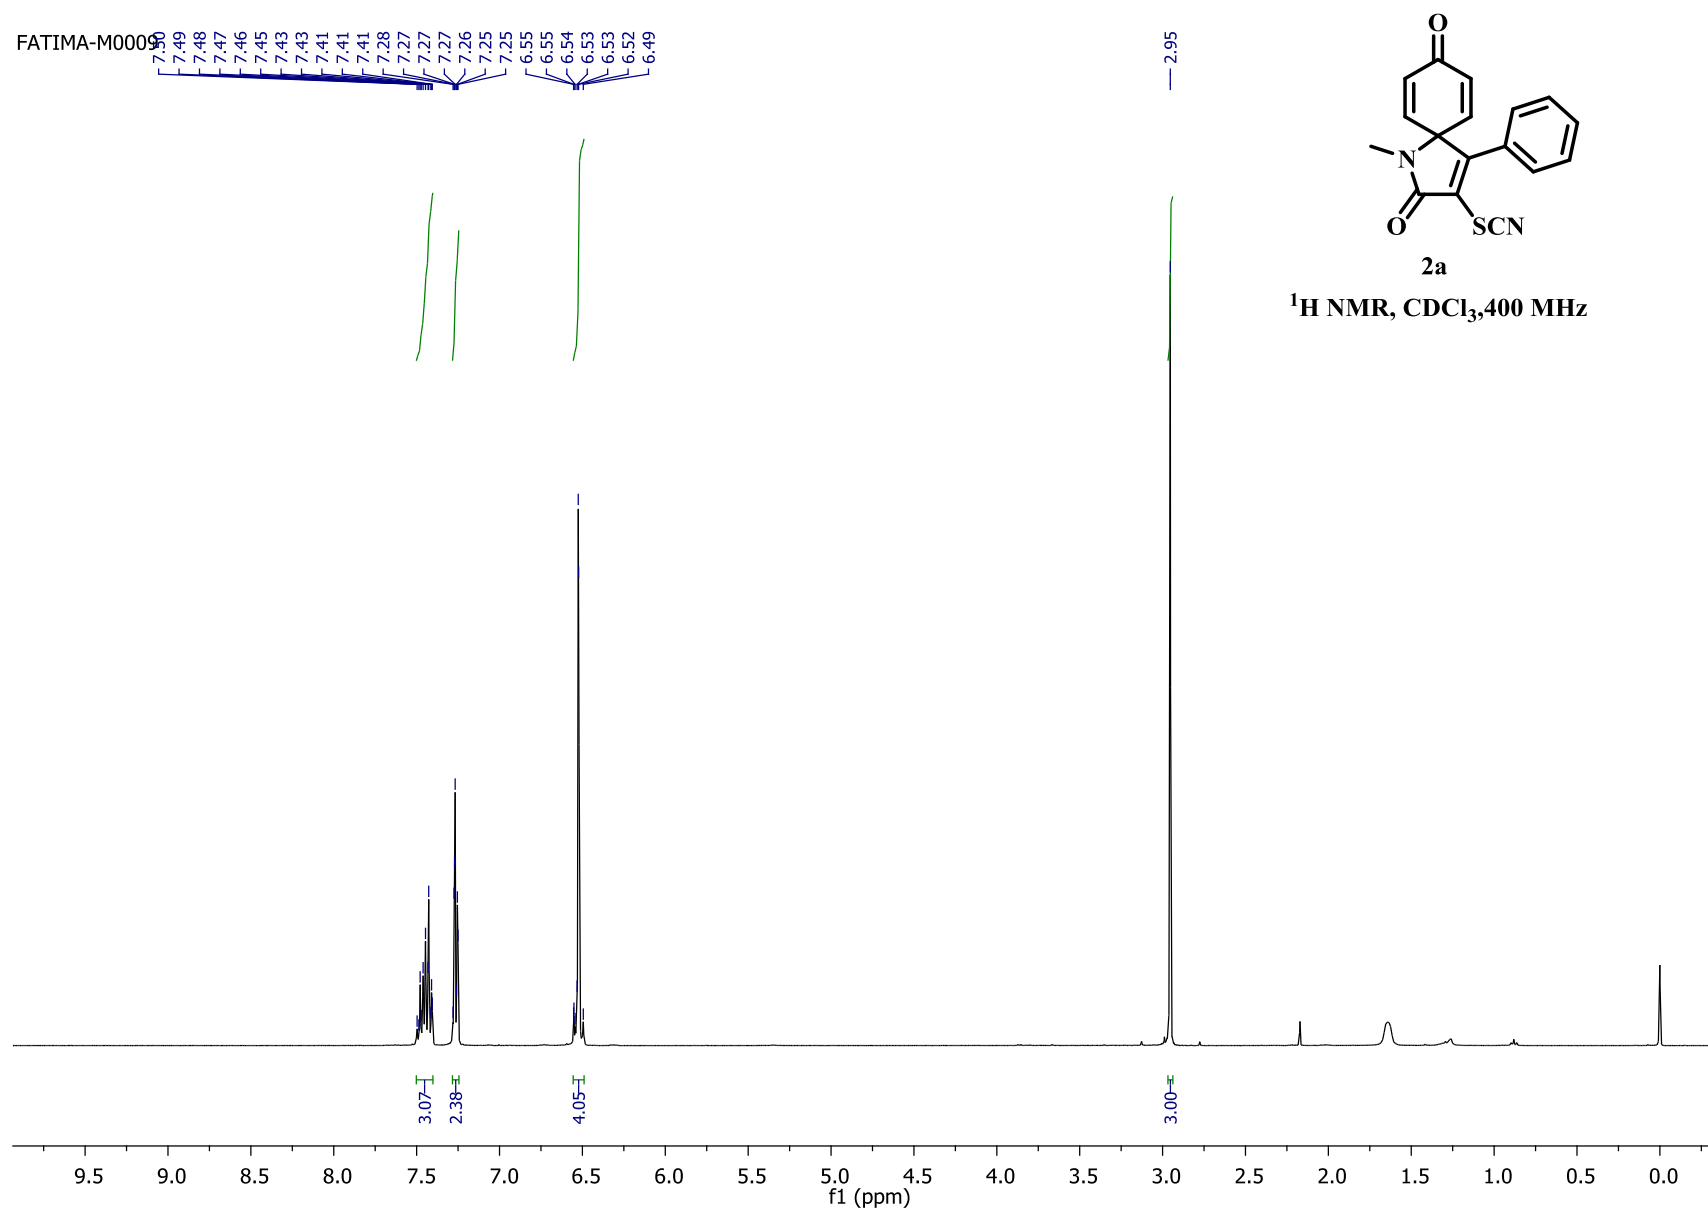

SANA-M0009

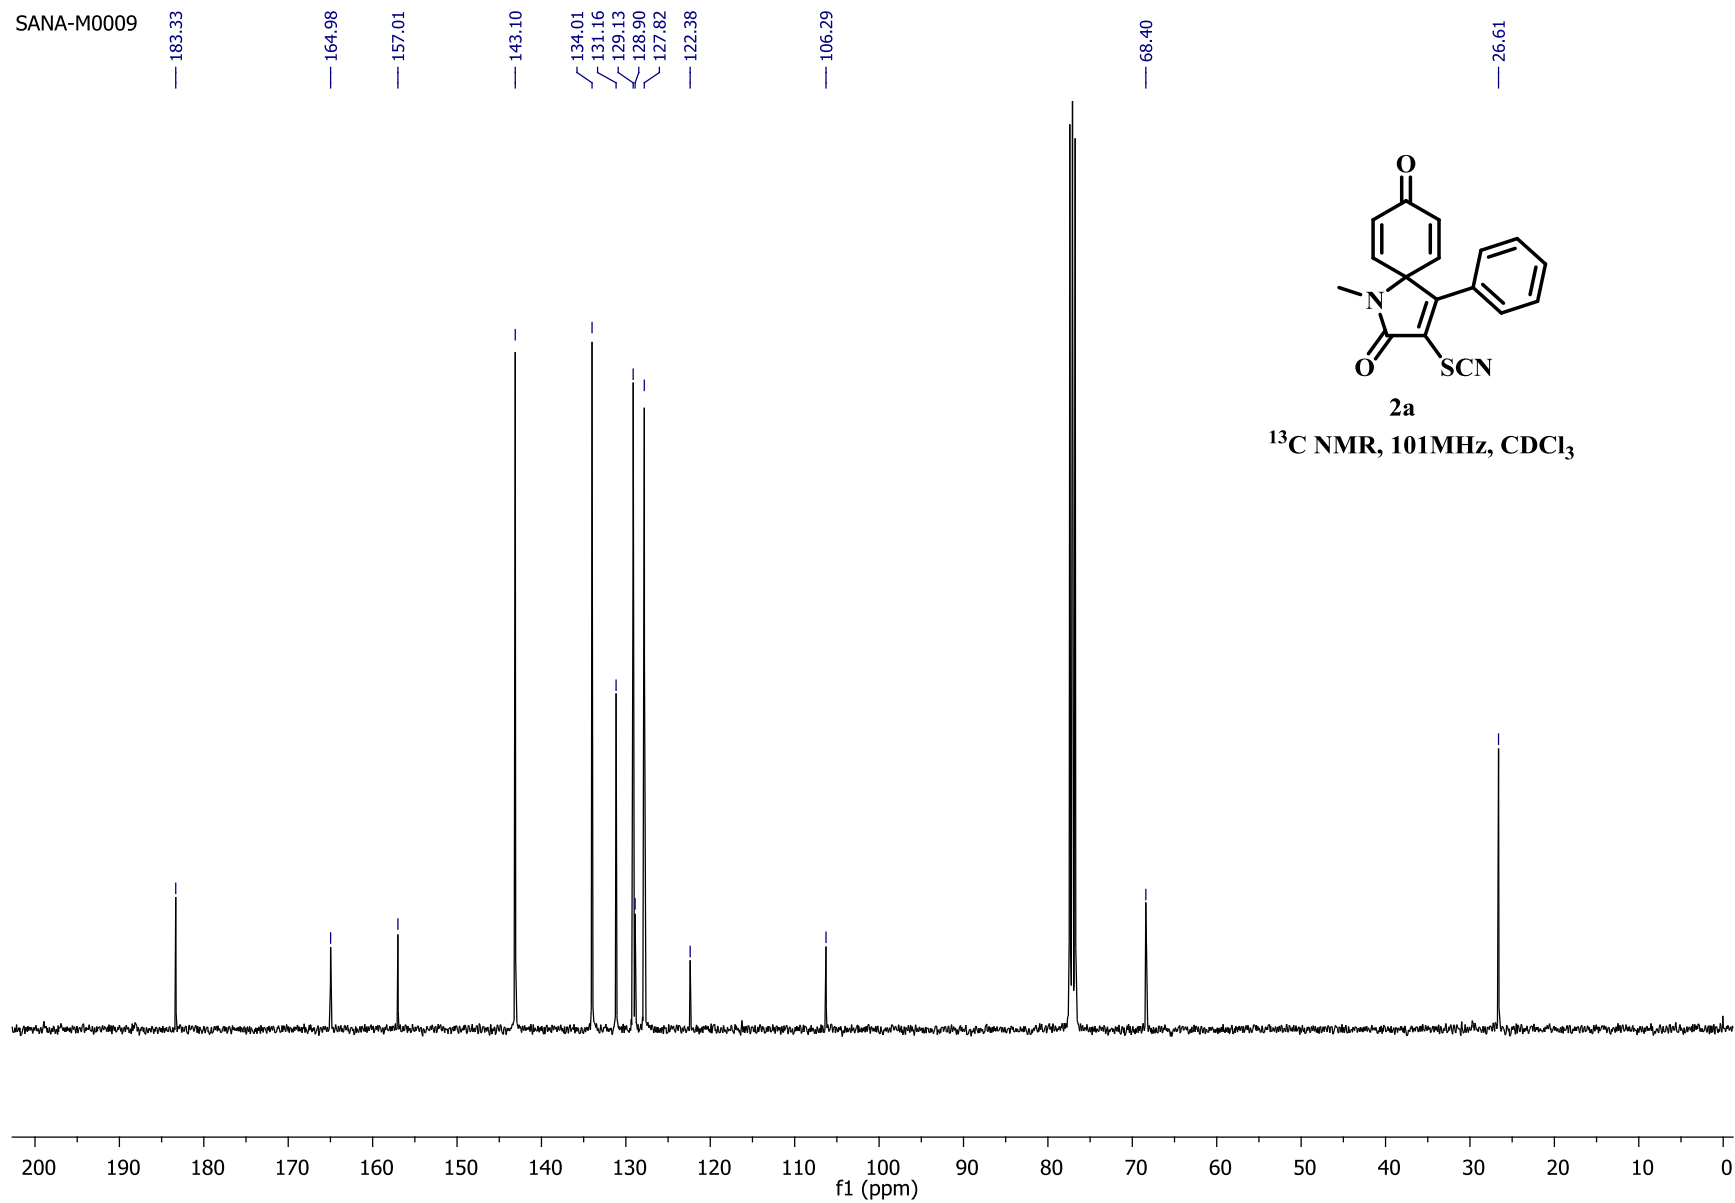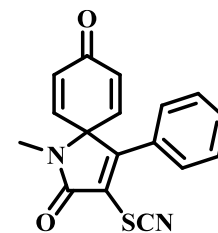

2a

<sup>13</sup>C NMR, 101MHz, CDCl<sub>3</sub>

AJAY-M0009

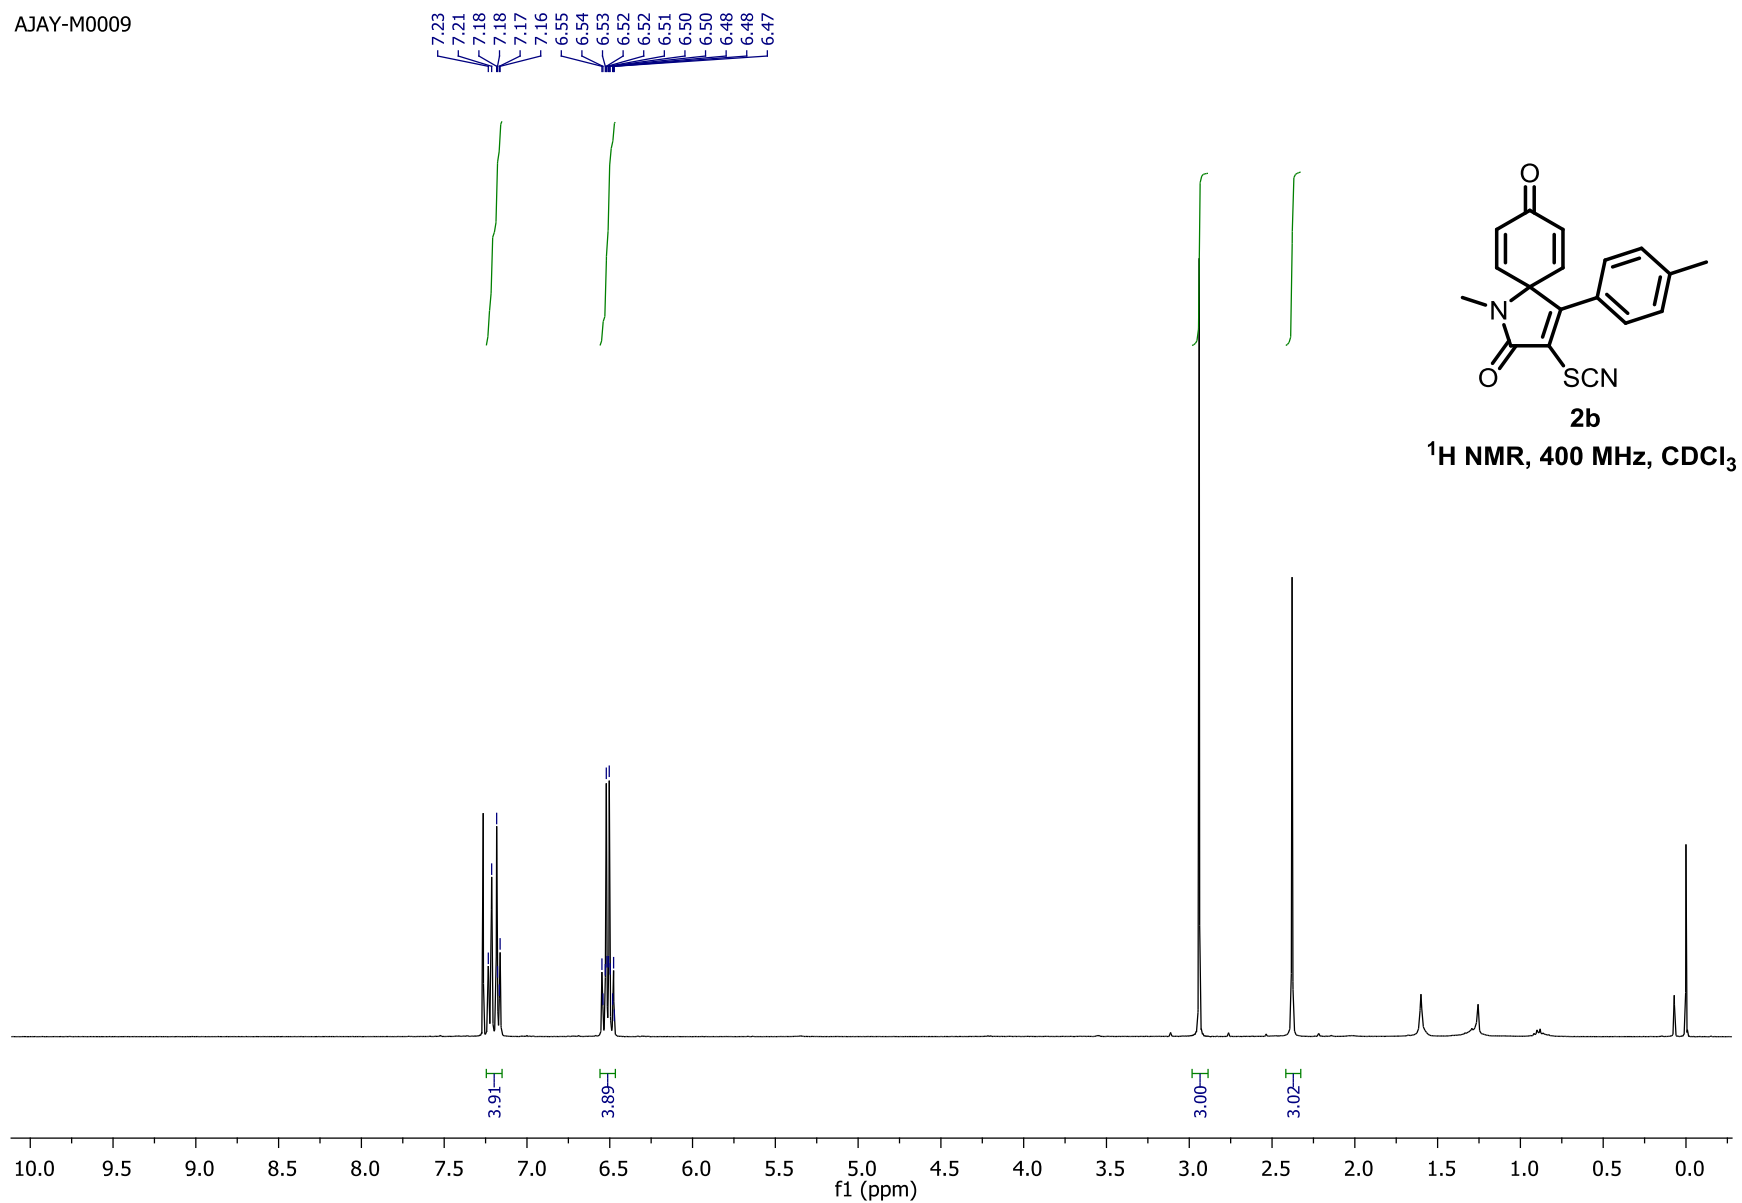

AJAY-M0009

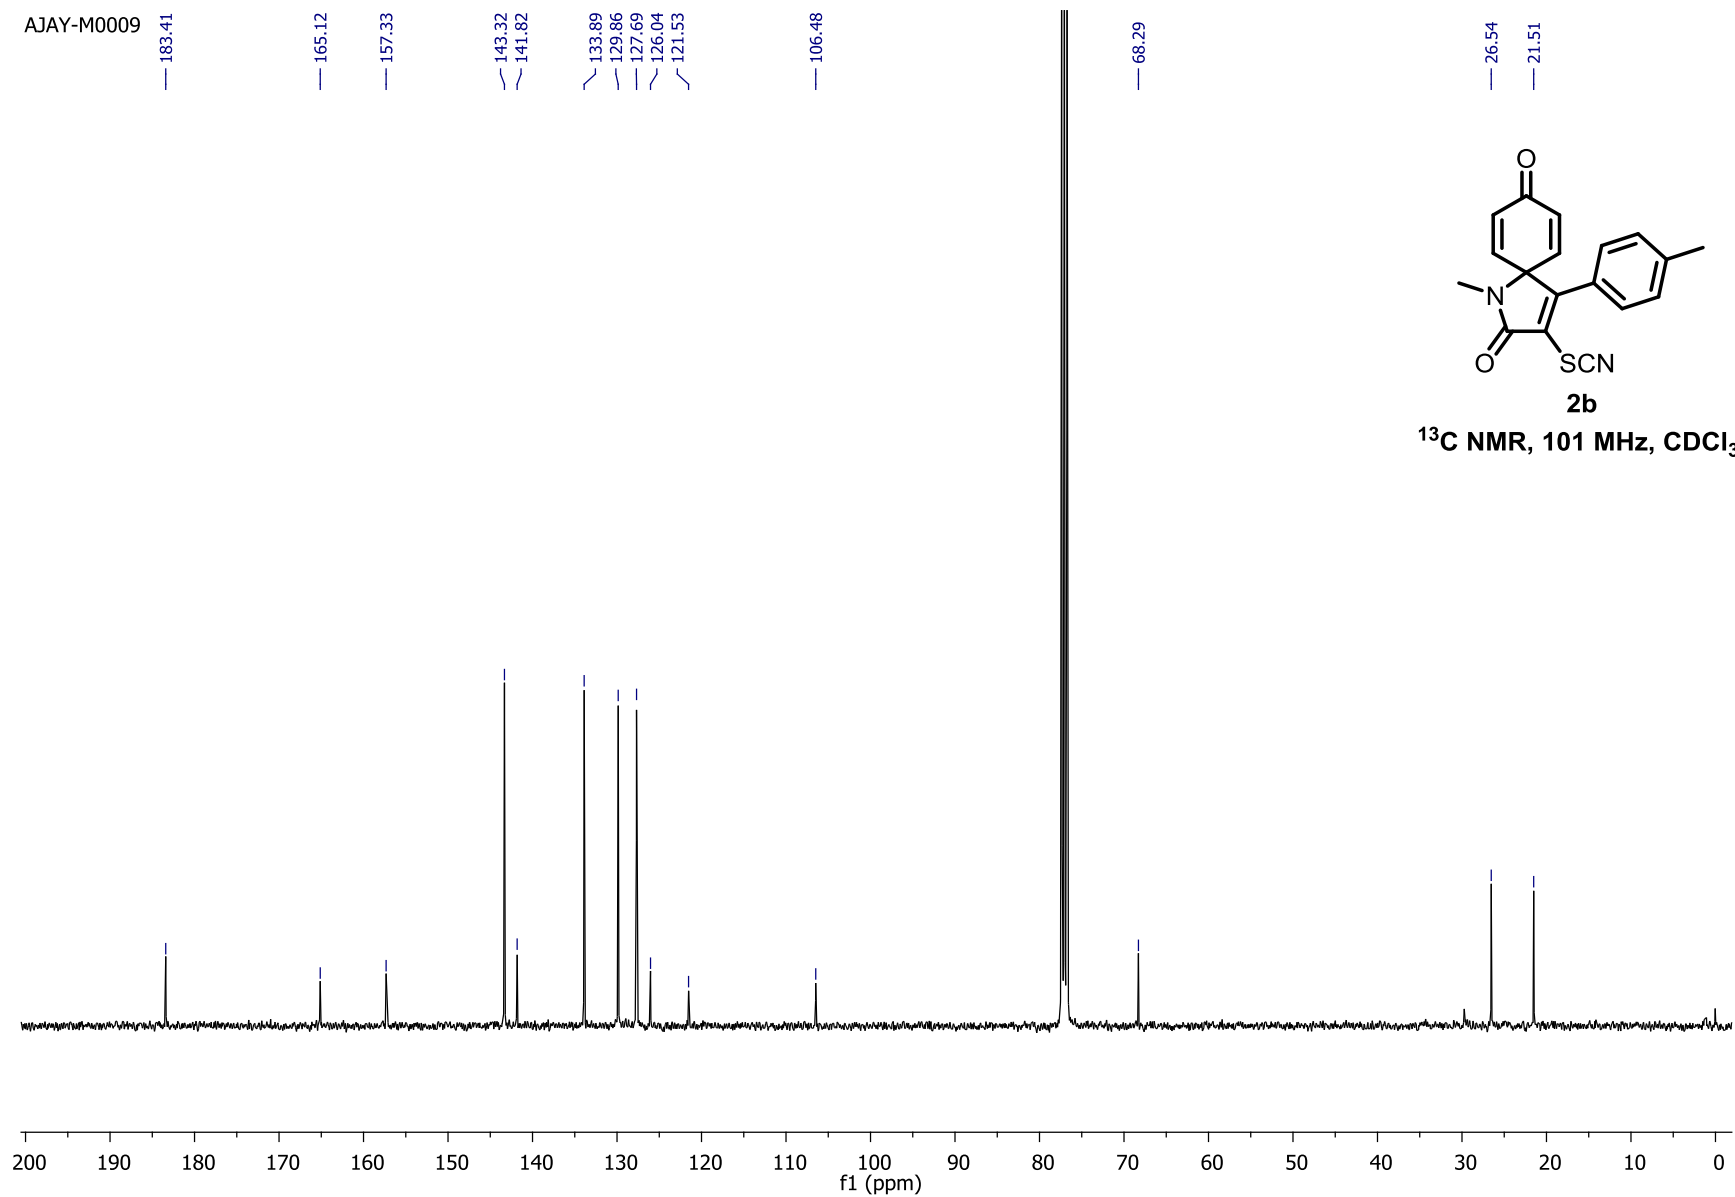

AJAY-M0009

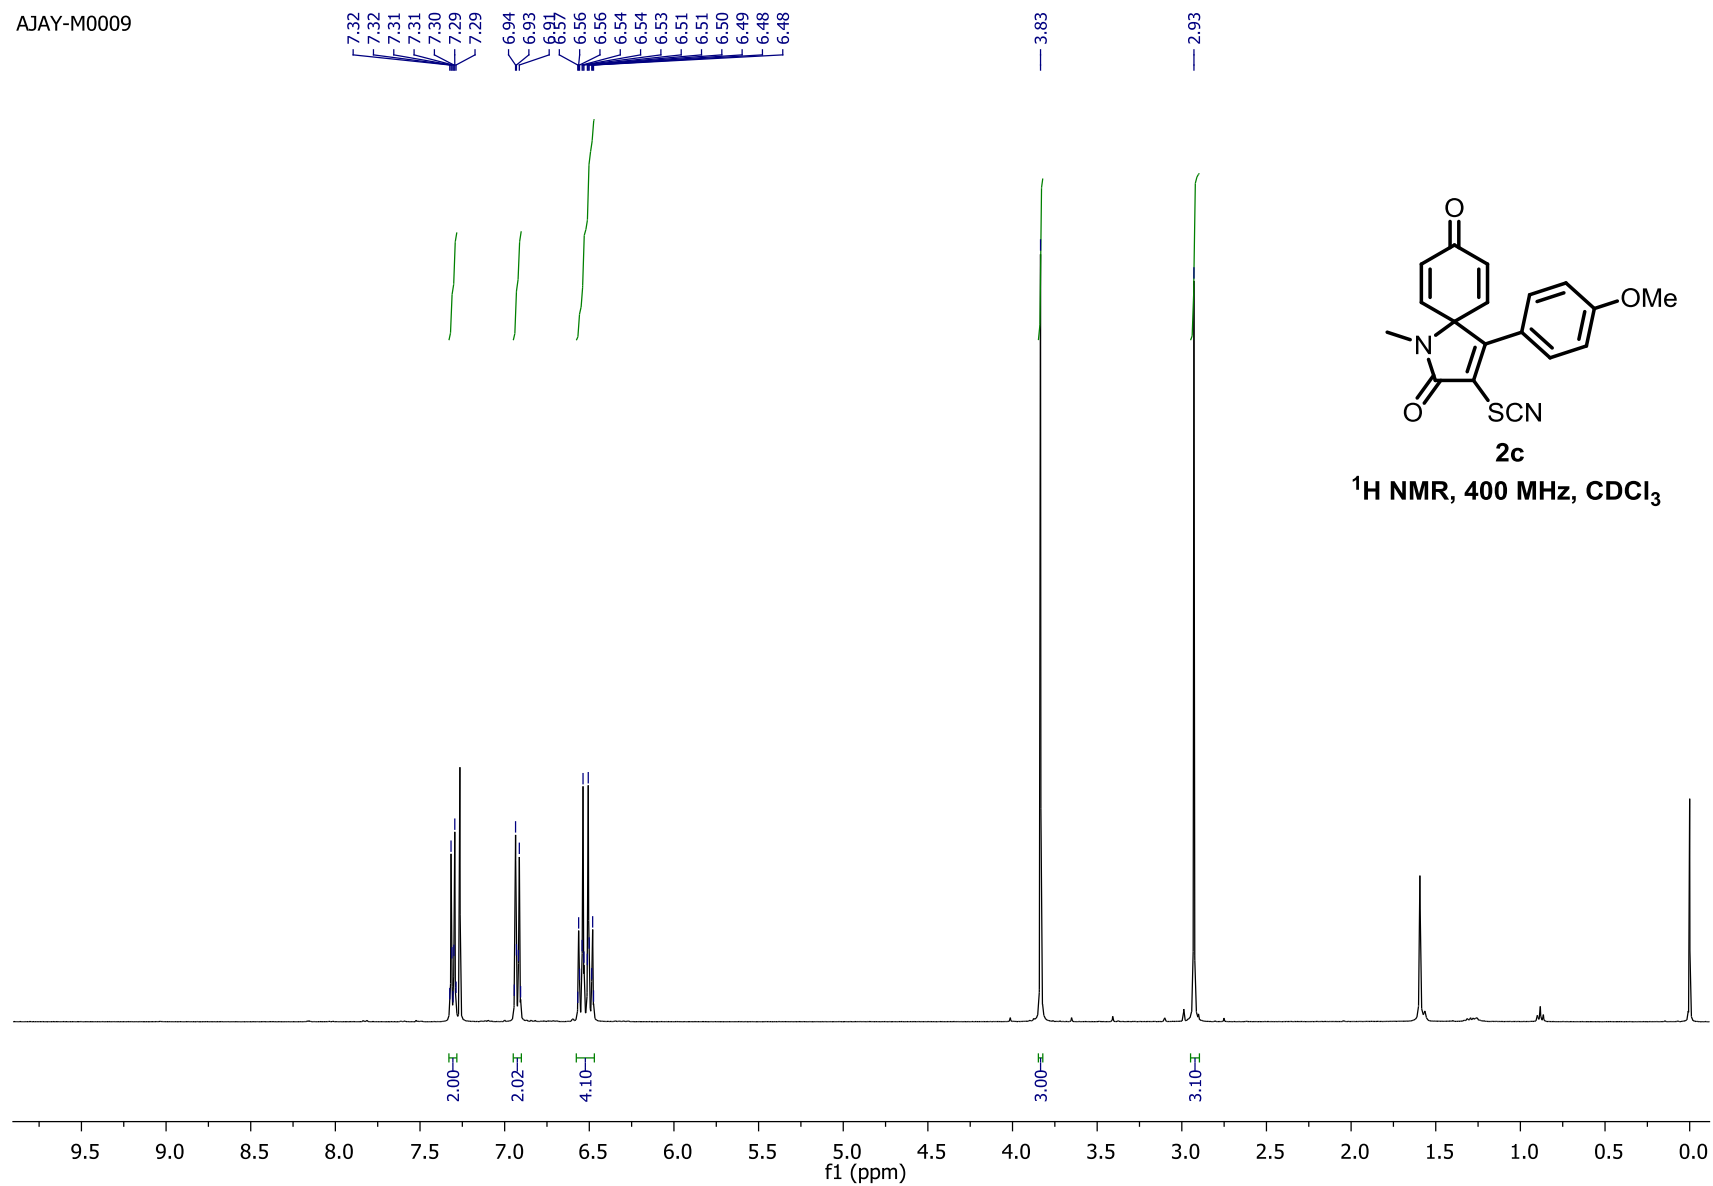

AJAY-M0009

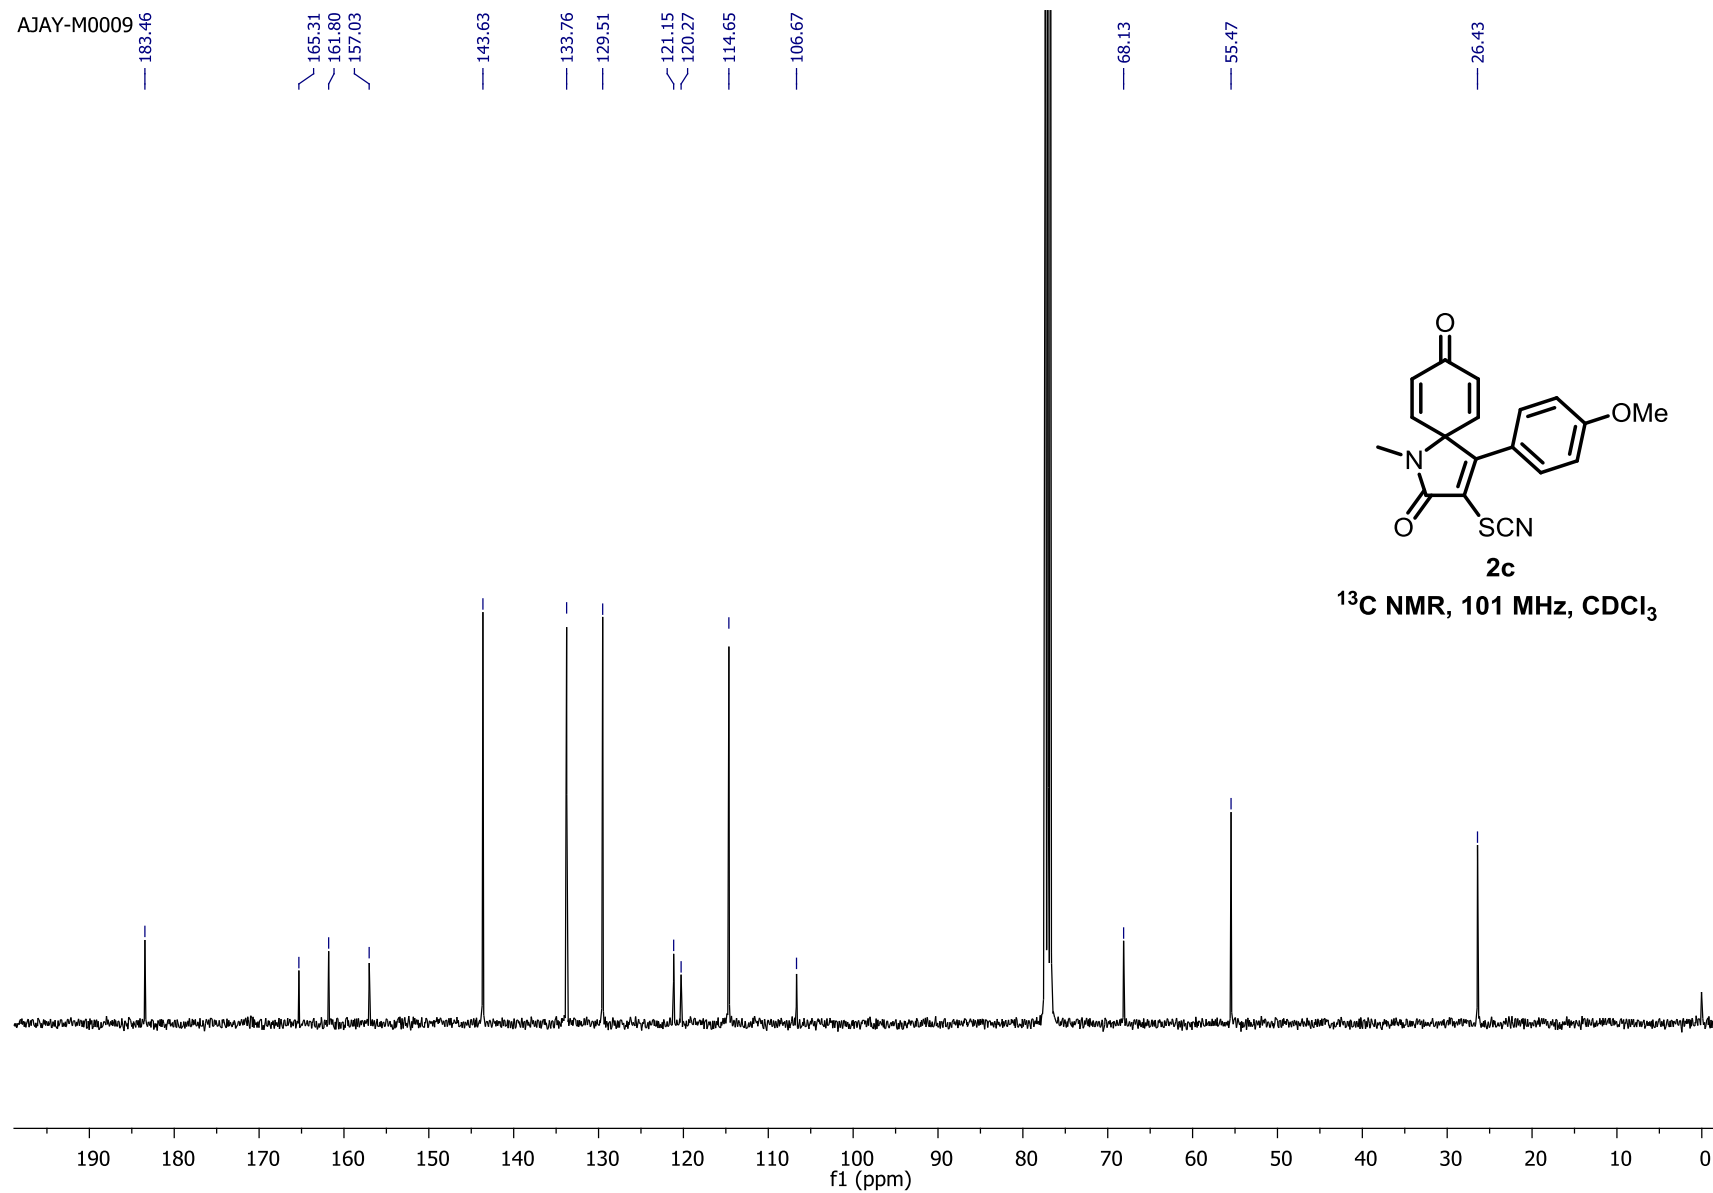

AJAY-M0009

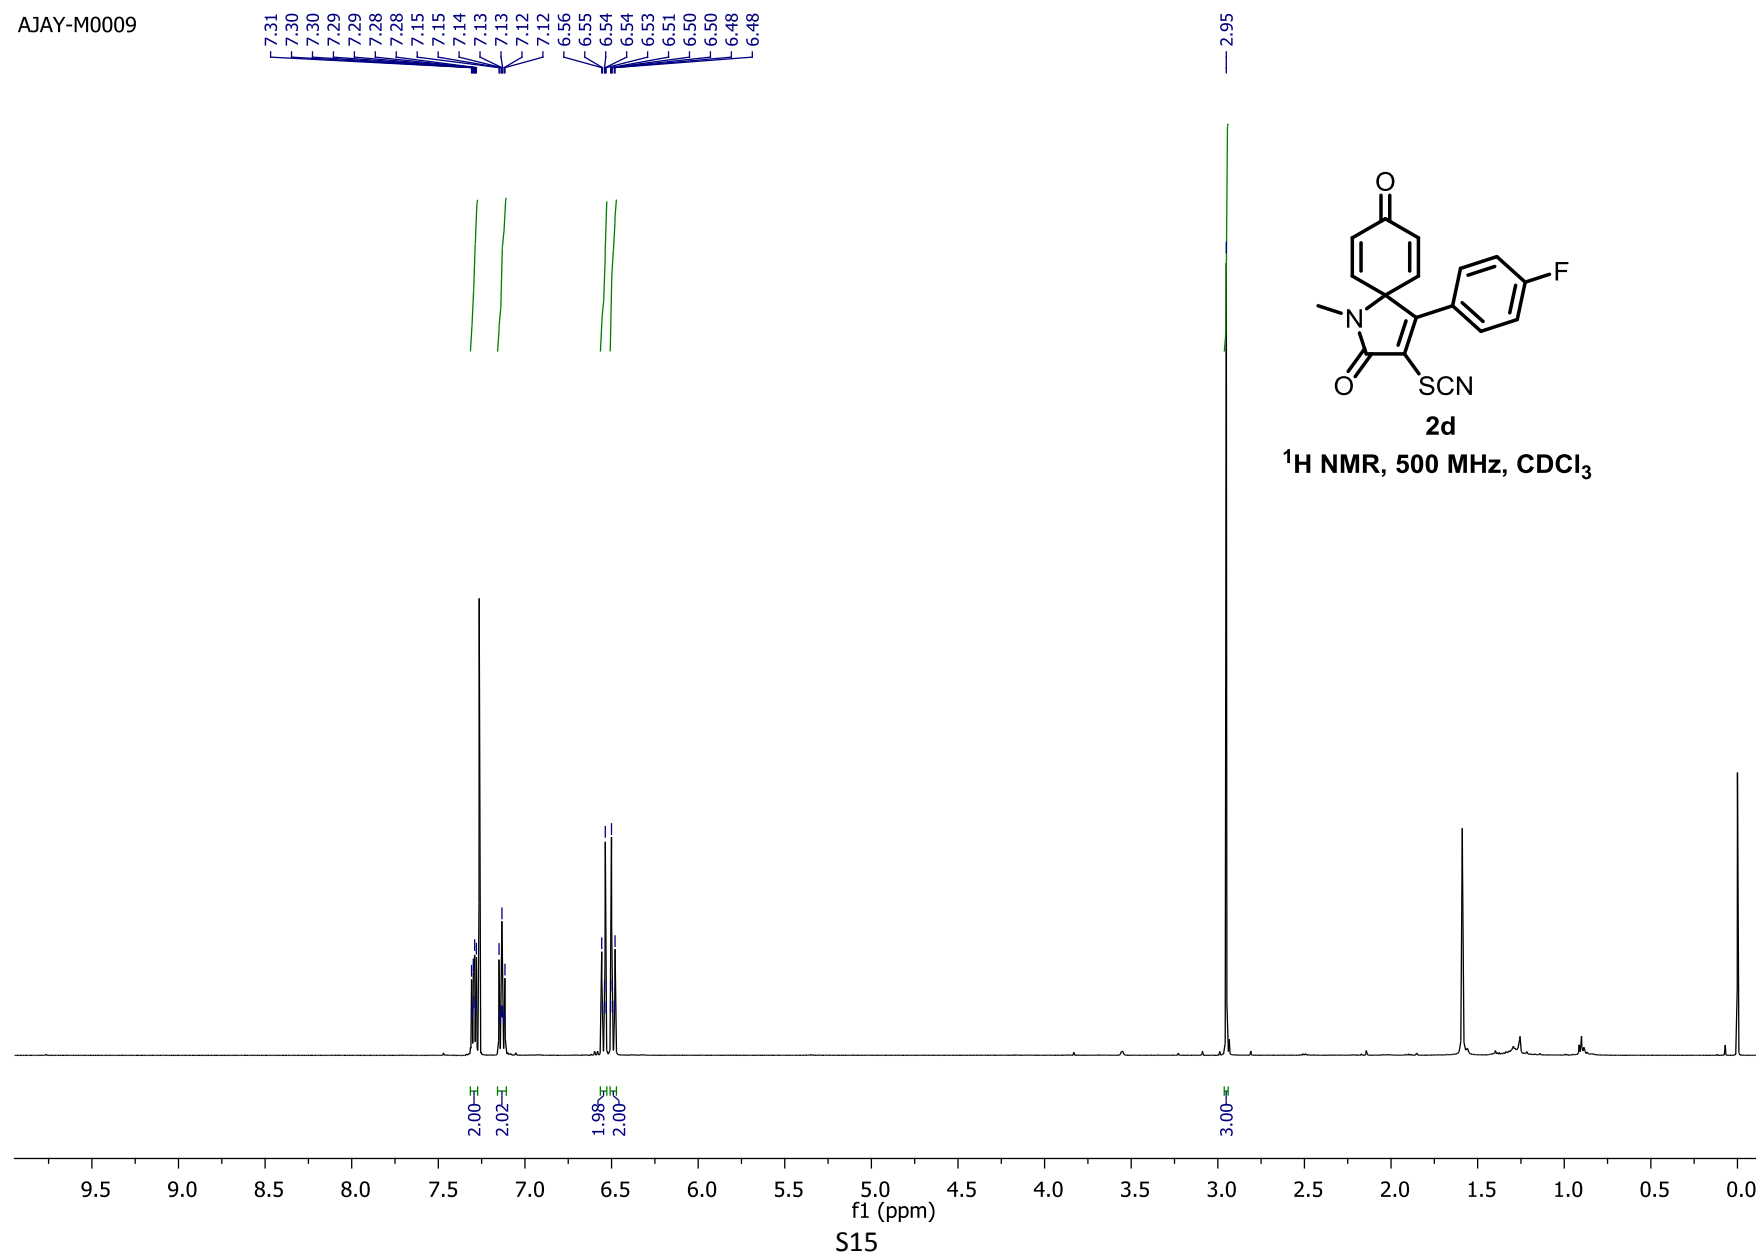

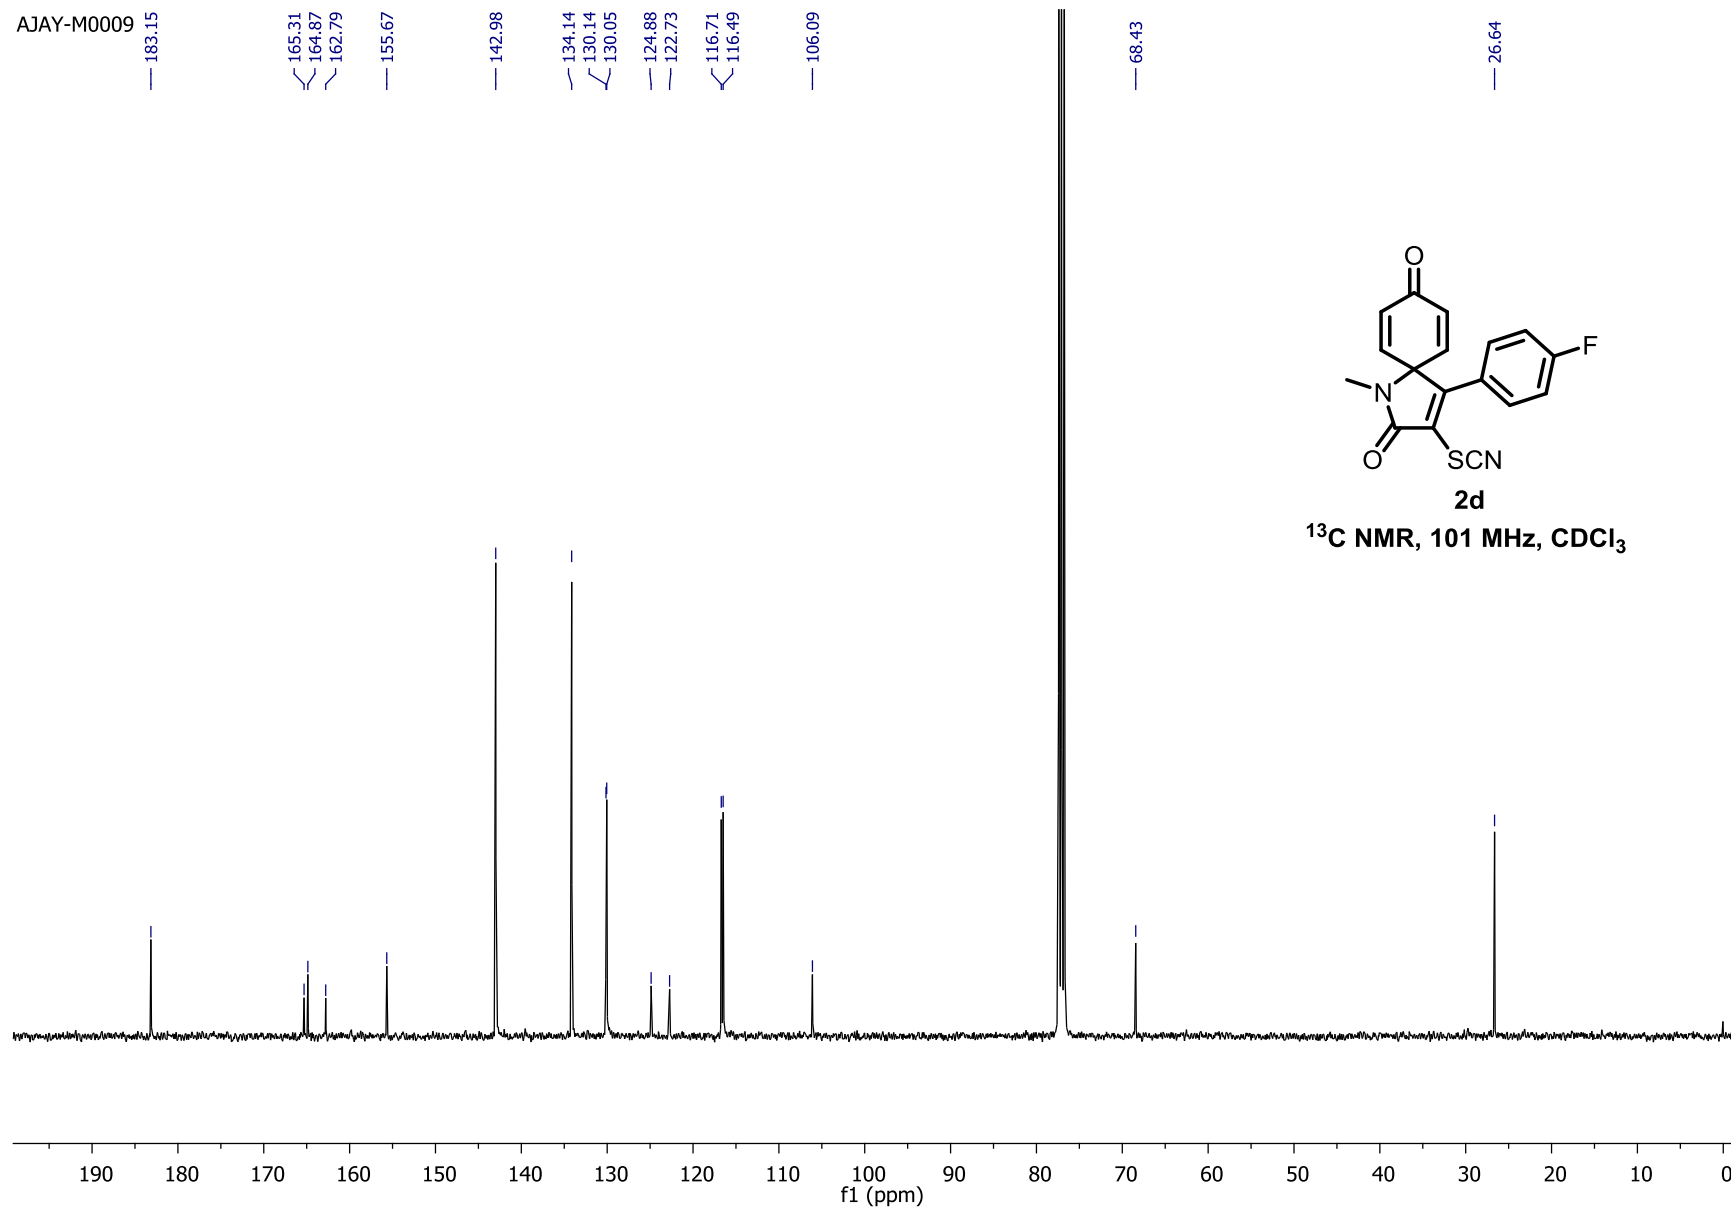



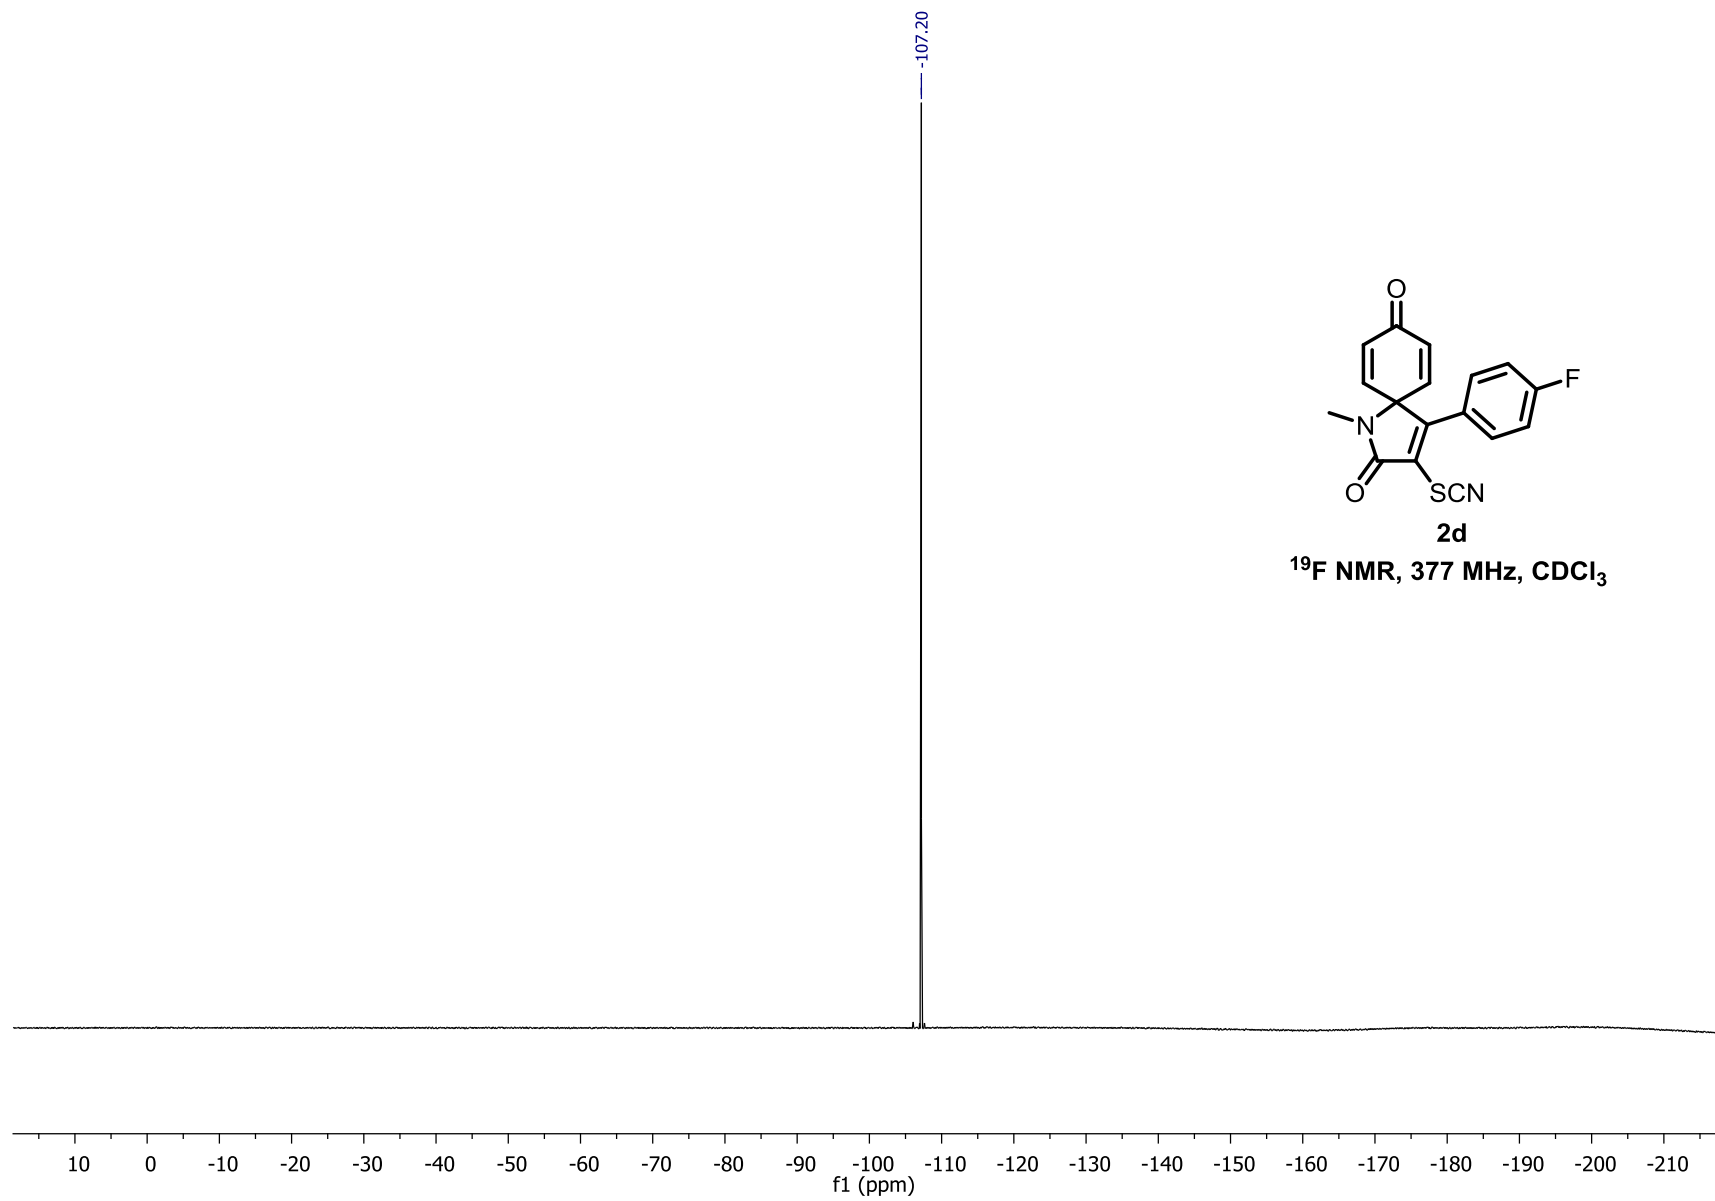

AJAY-M0009

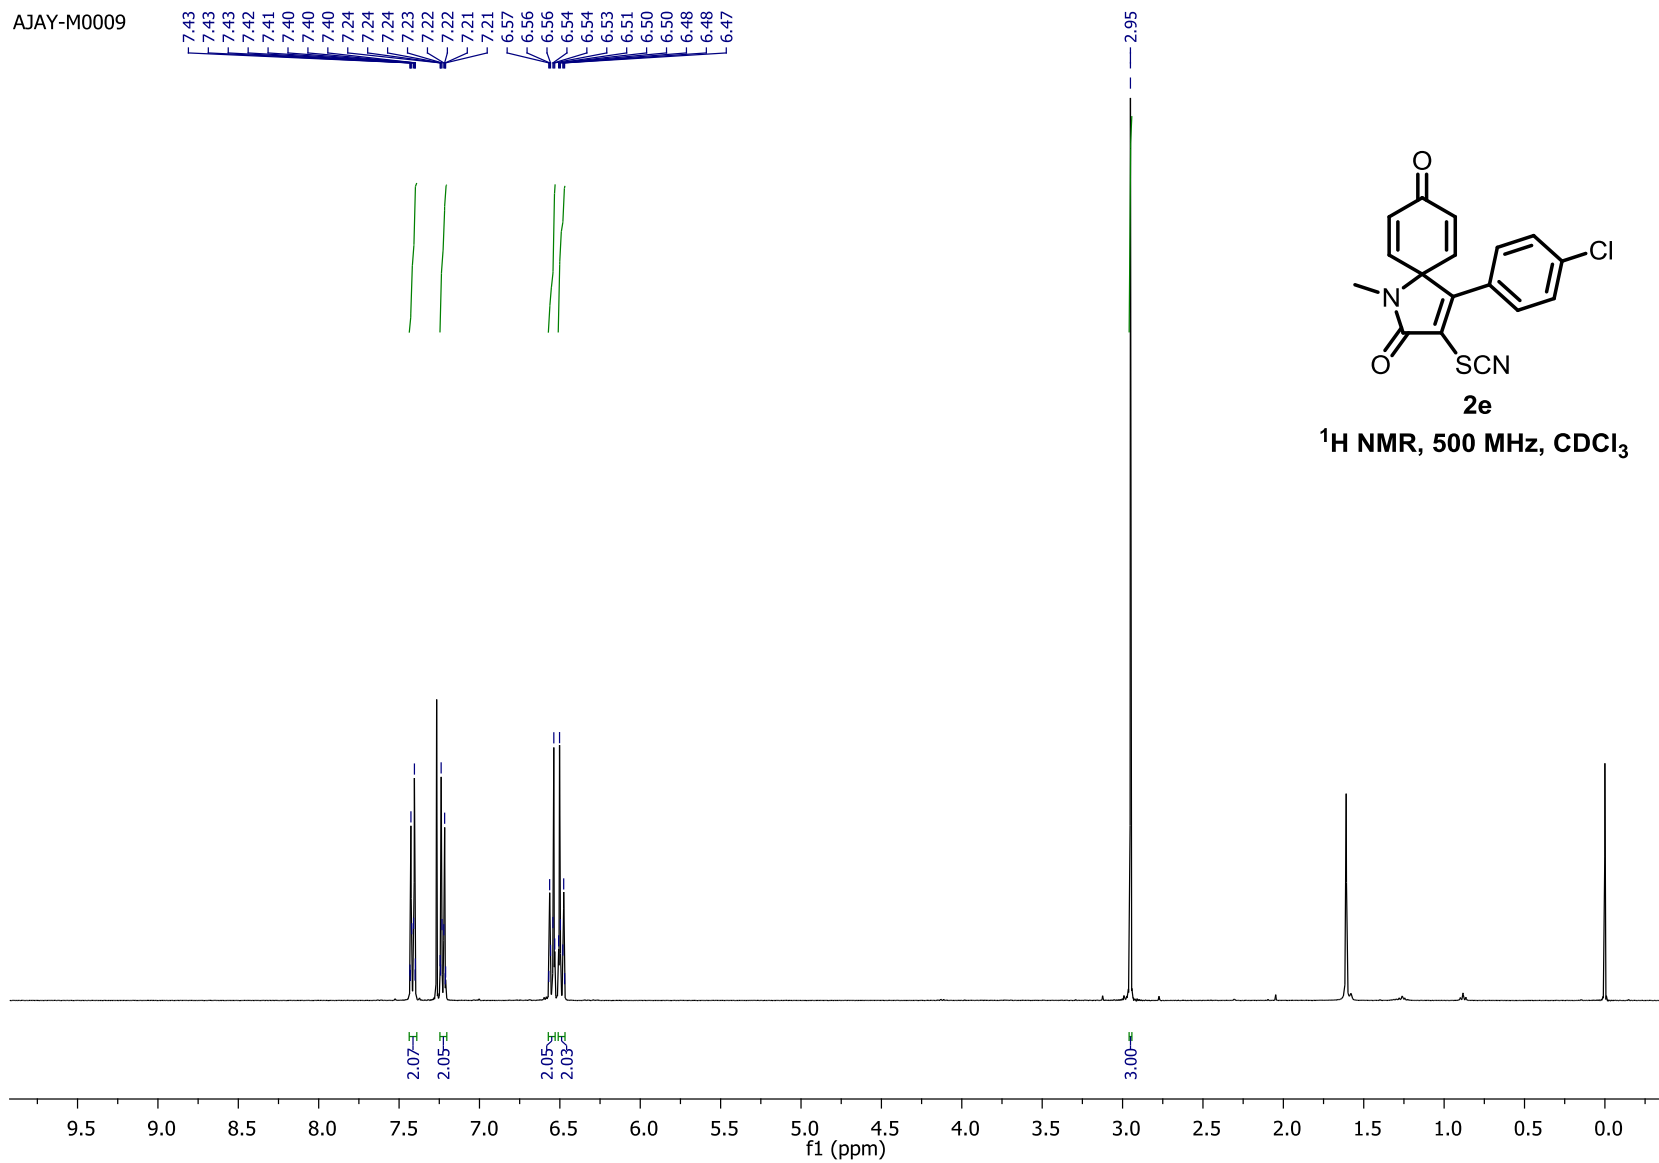

AJAY-M0009

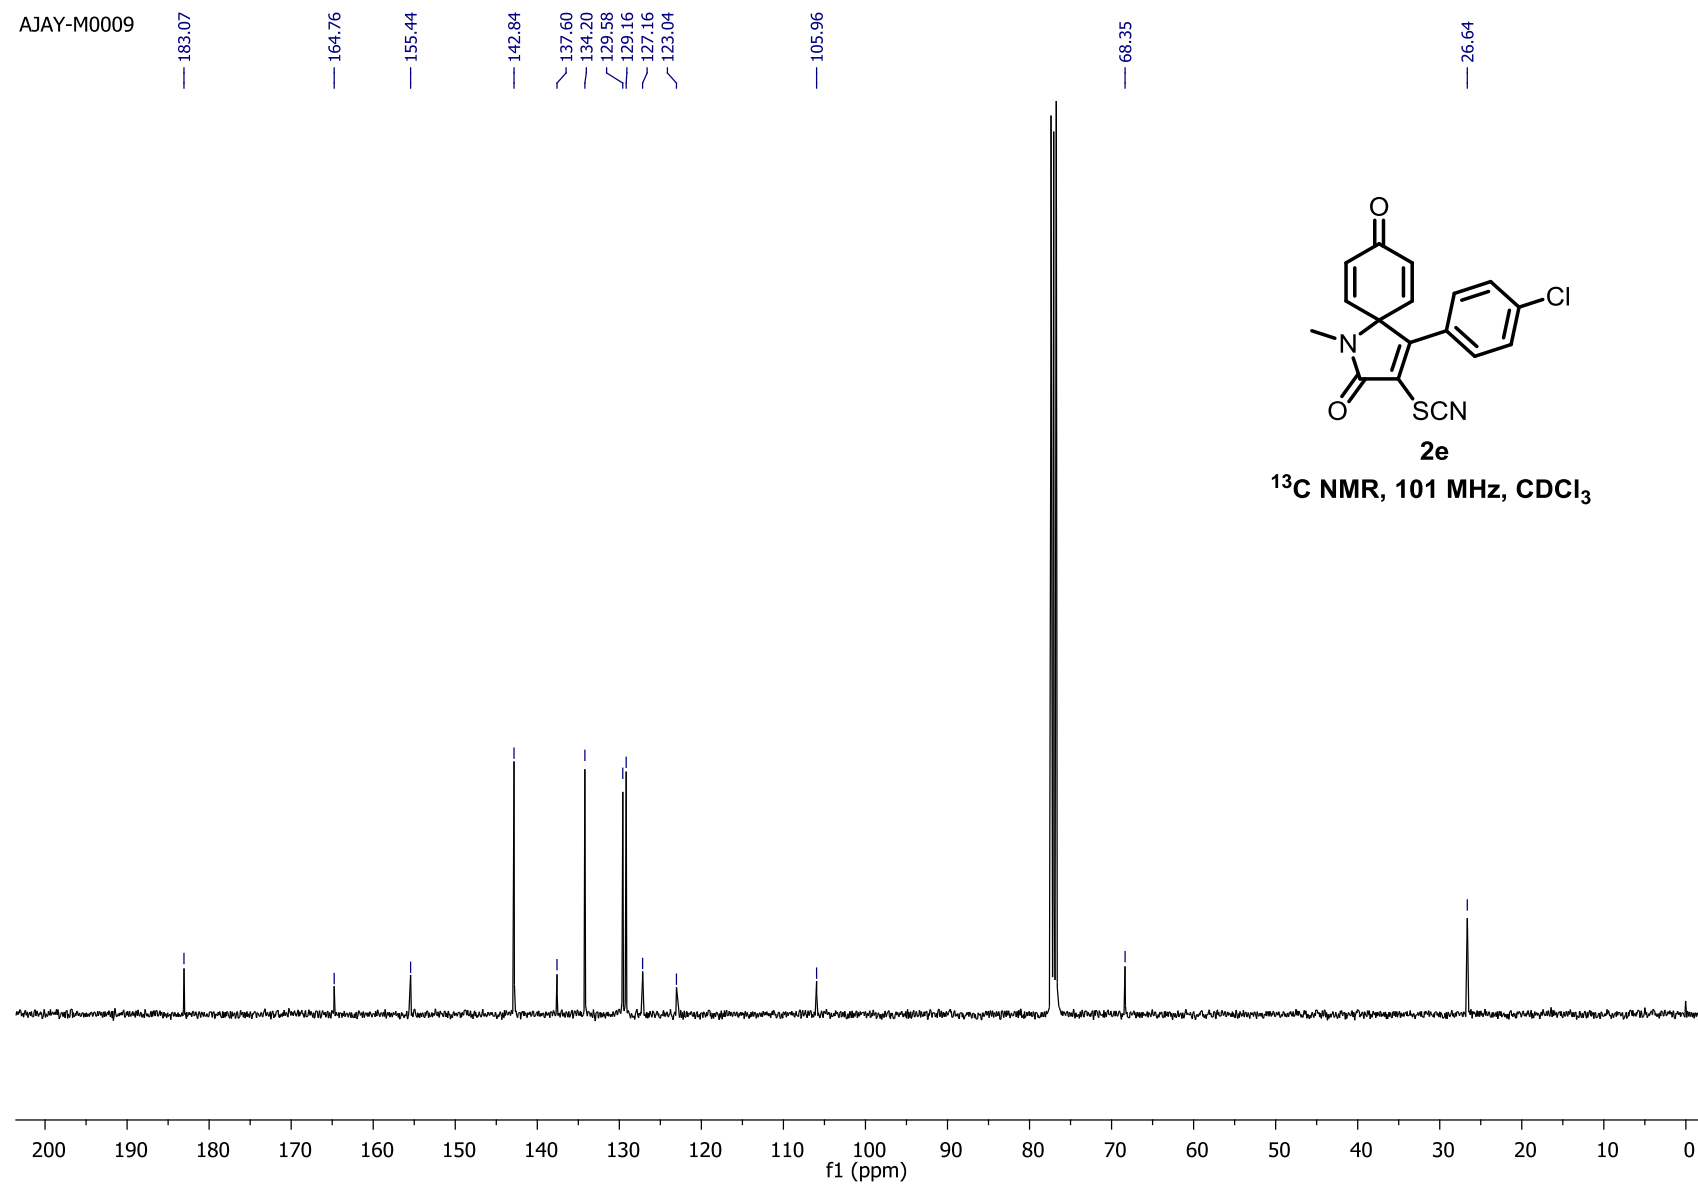

AJAY-M0009

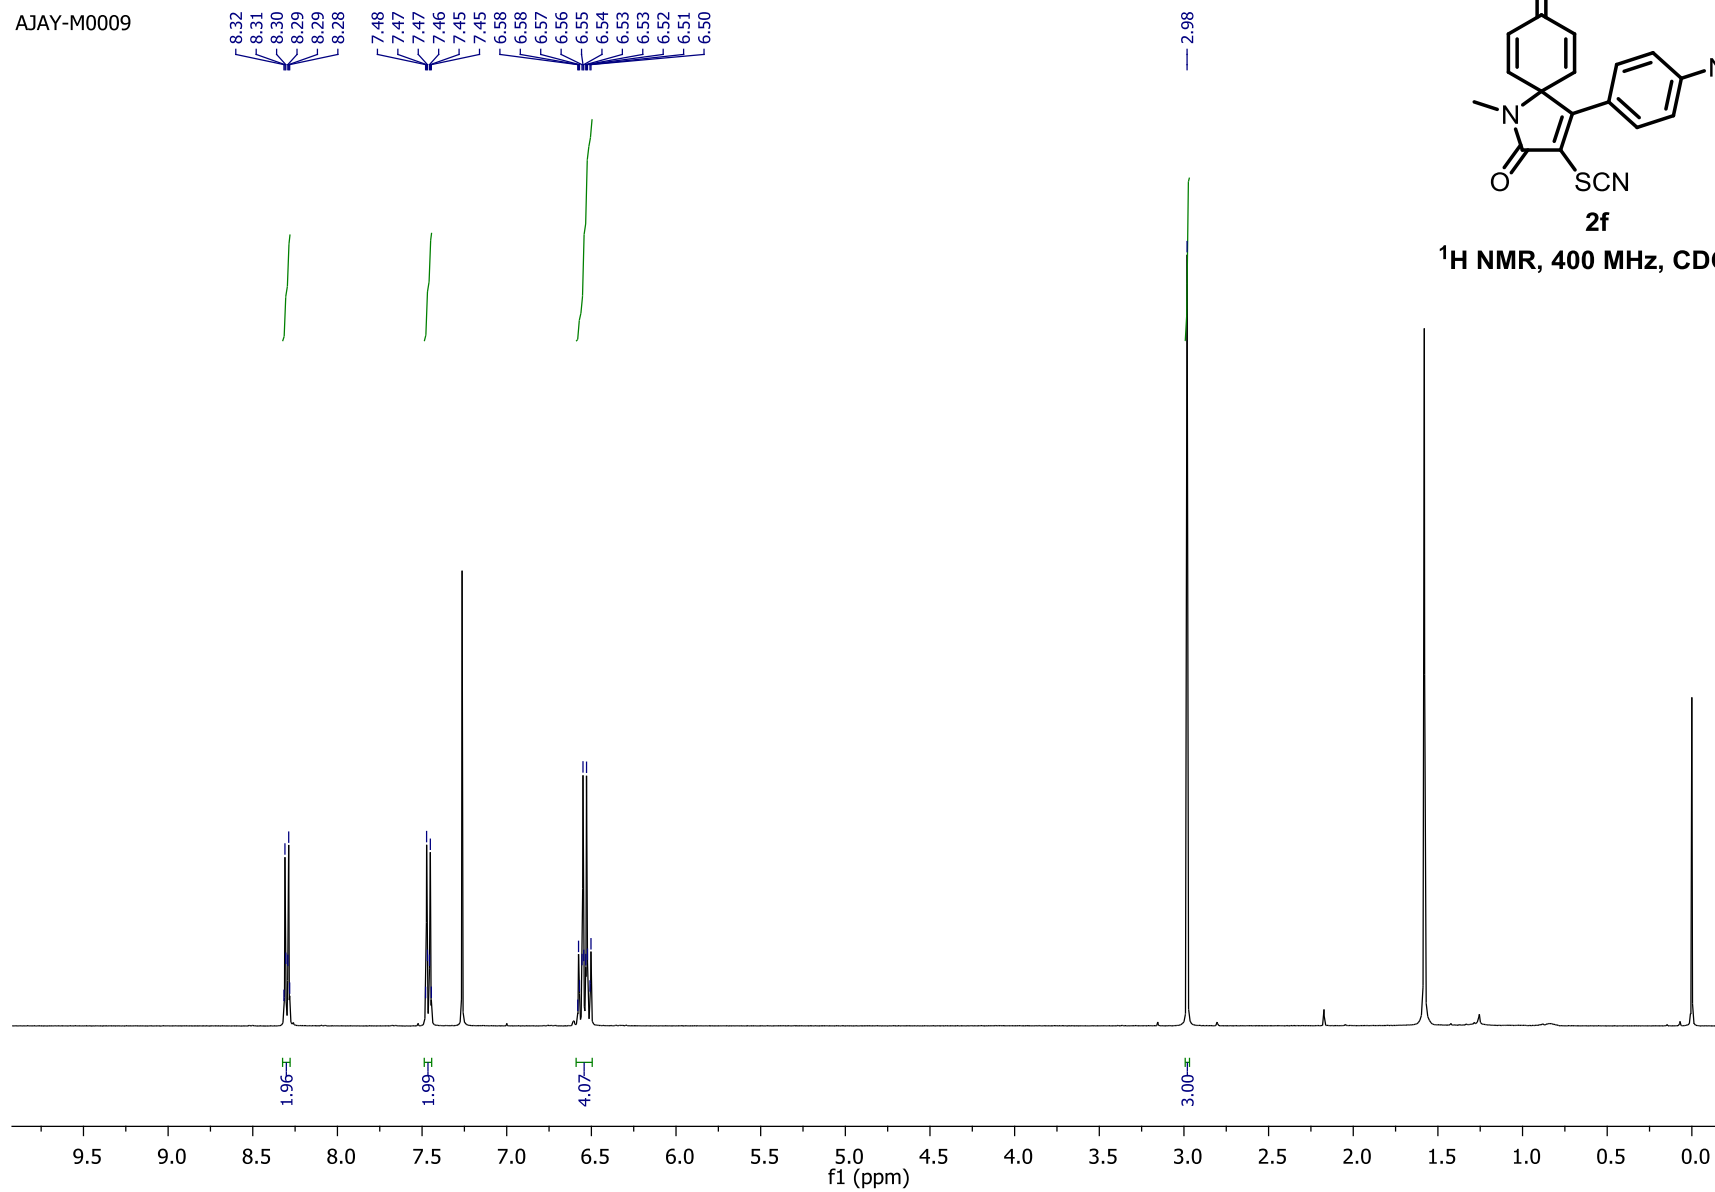

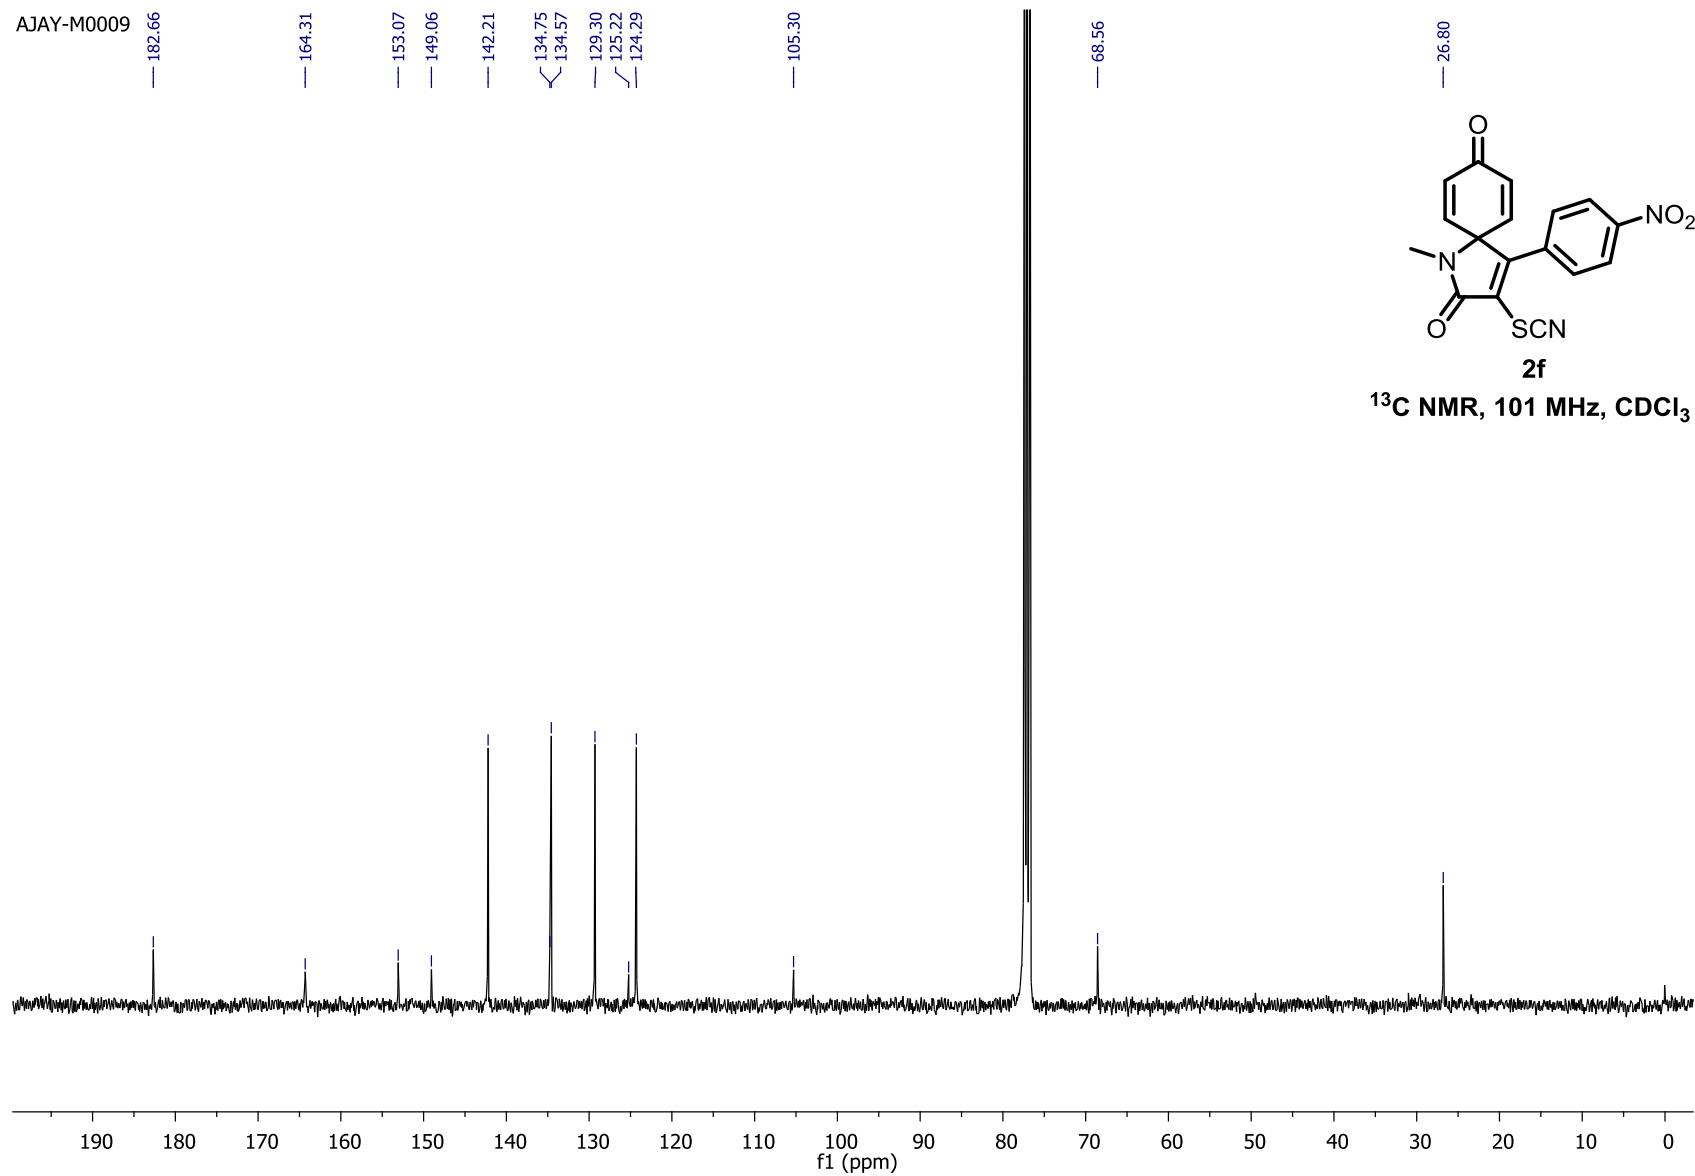

AJAY-M0009

7.77  
7.76  
7.75  
7.74  
7.73  
7.72  
7.41  
7.40  
7.39  
7.37  
6.57  
6.56  
6.55  
6.54  
6.52  
6.50

2.97

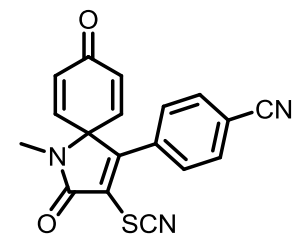

**2g**

<sup>1</sup>H NMR, 400 MHz, CDCl<sub>3</sub>

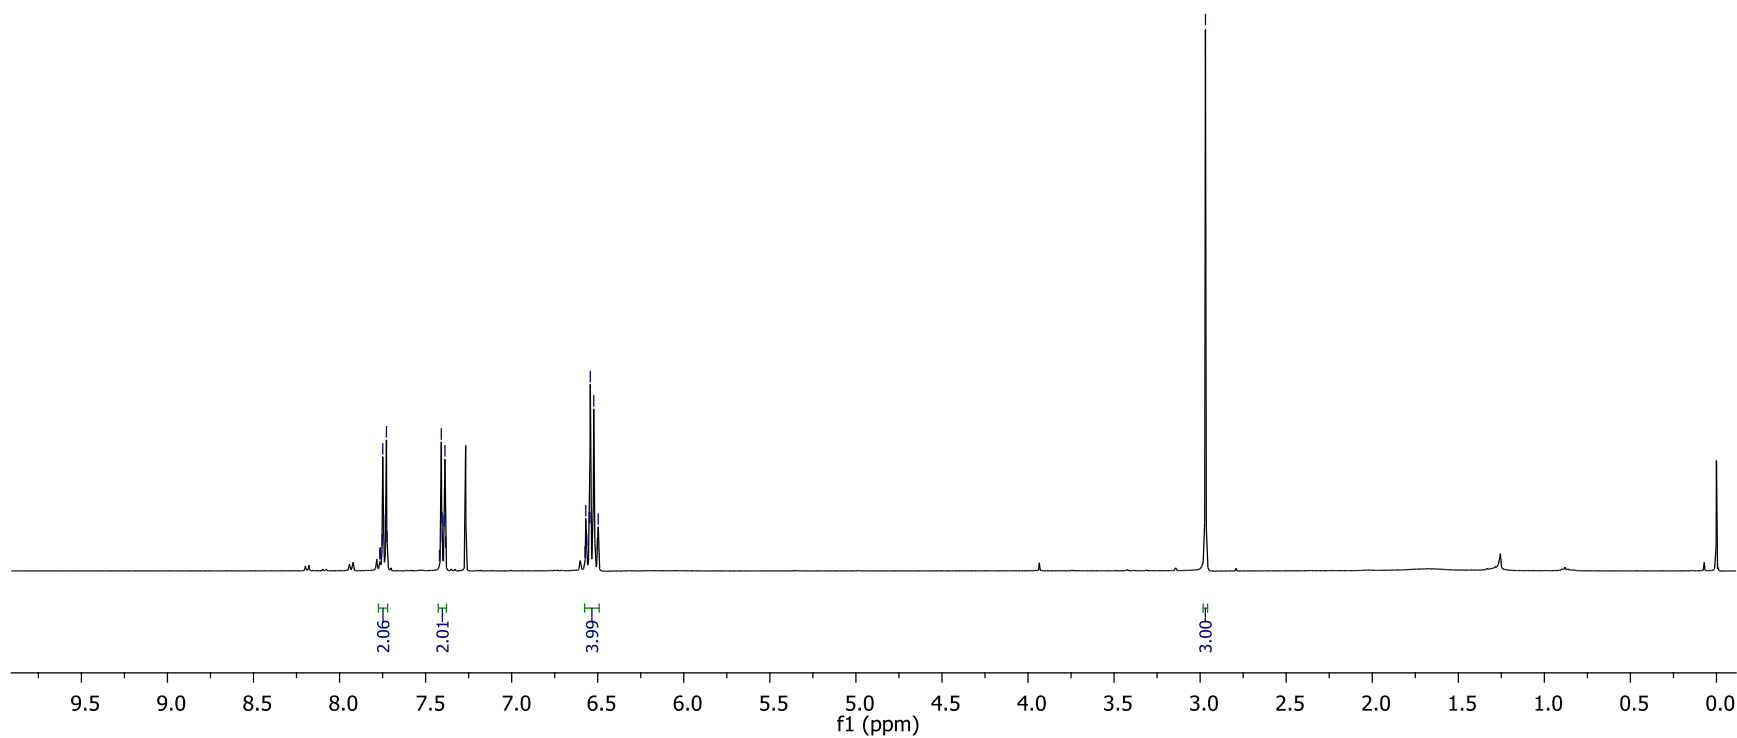

AJAY-M0009

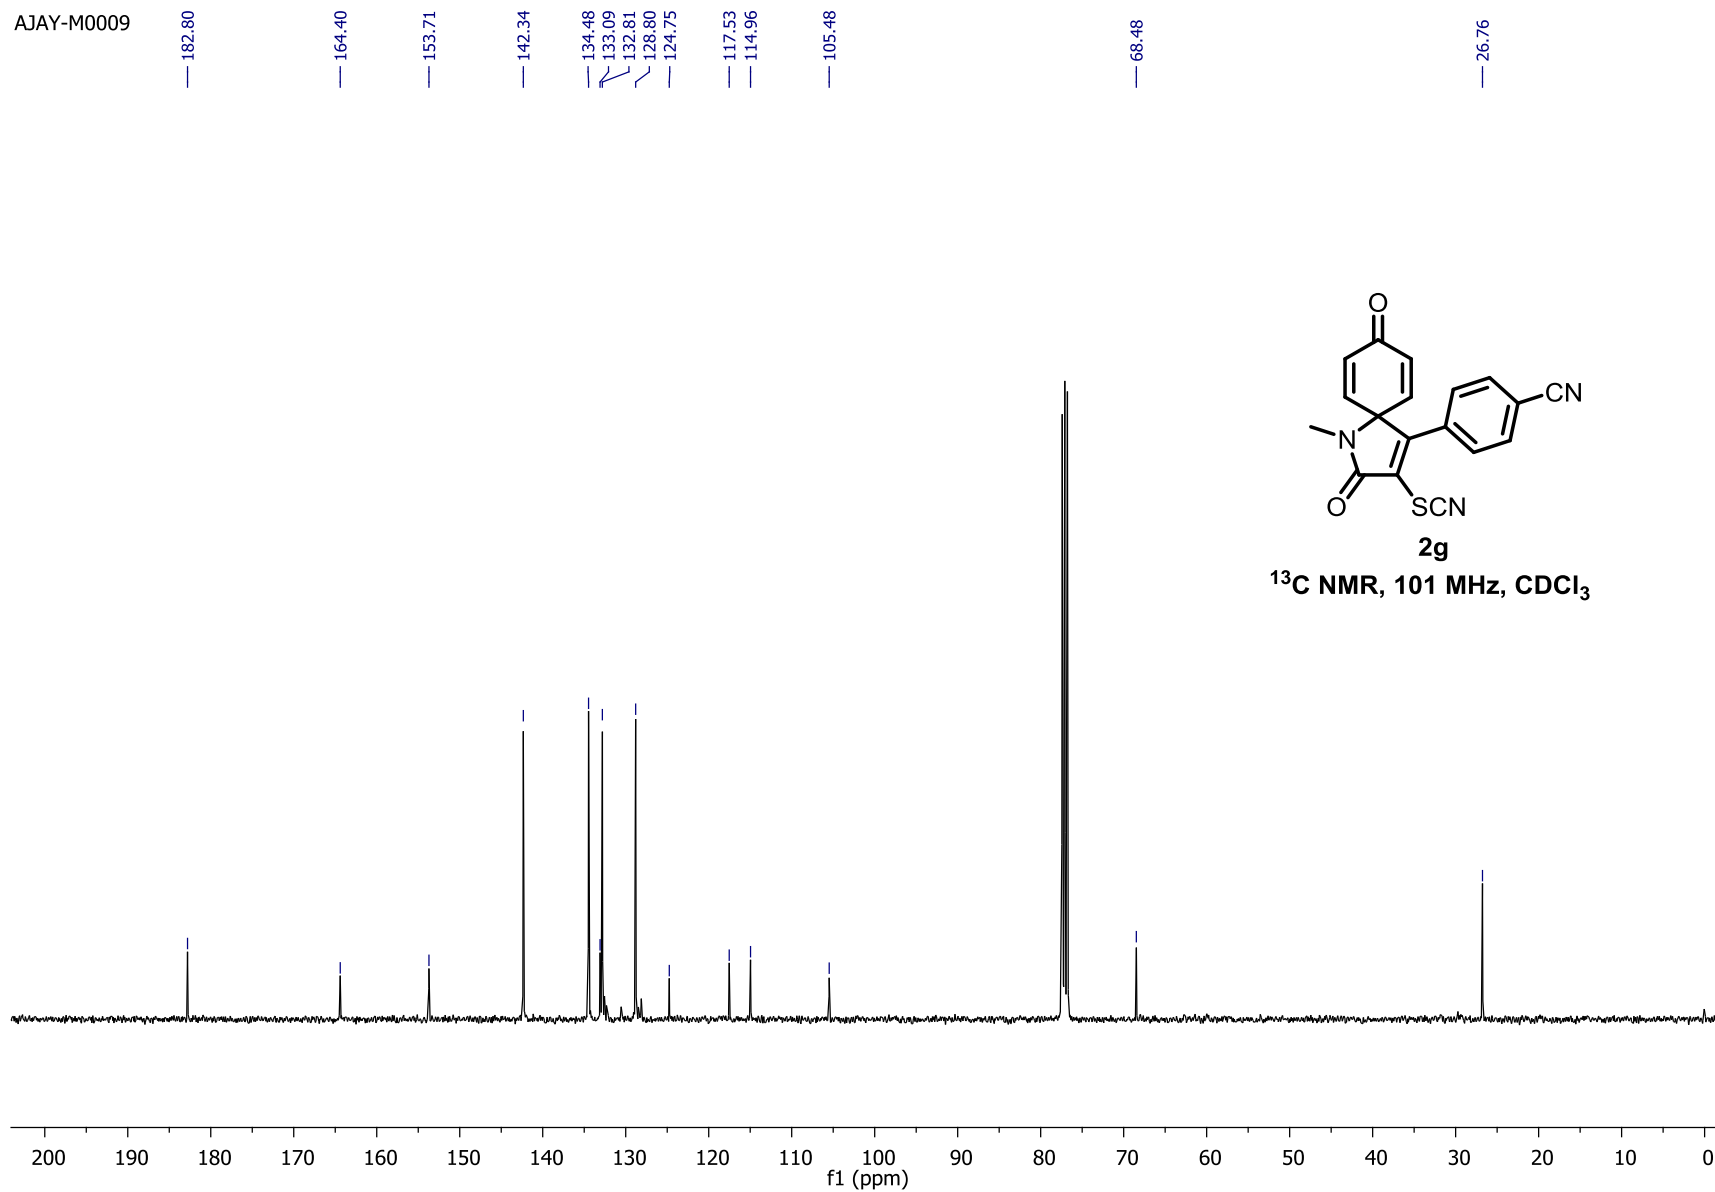

AJAY-M0008

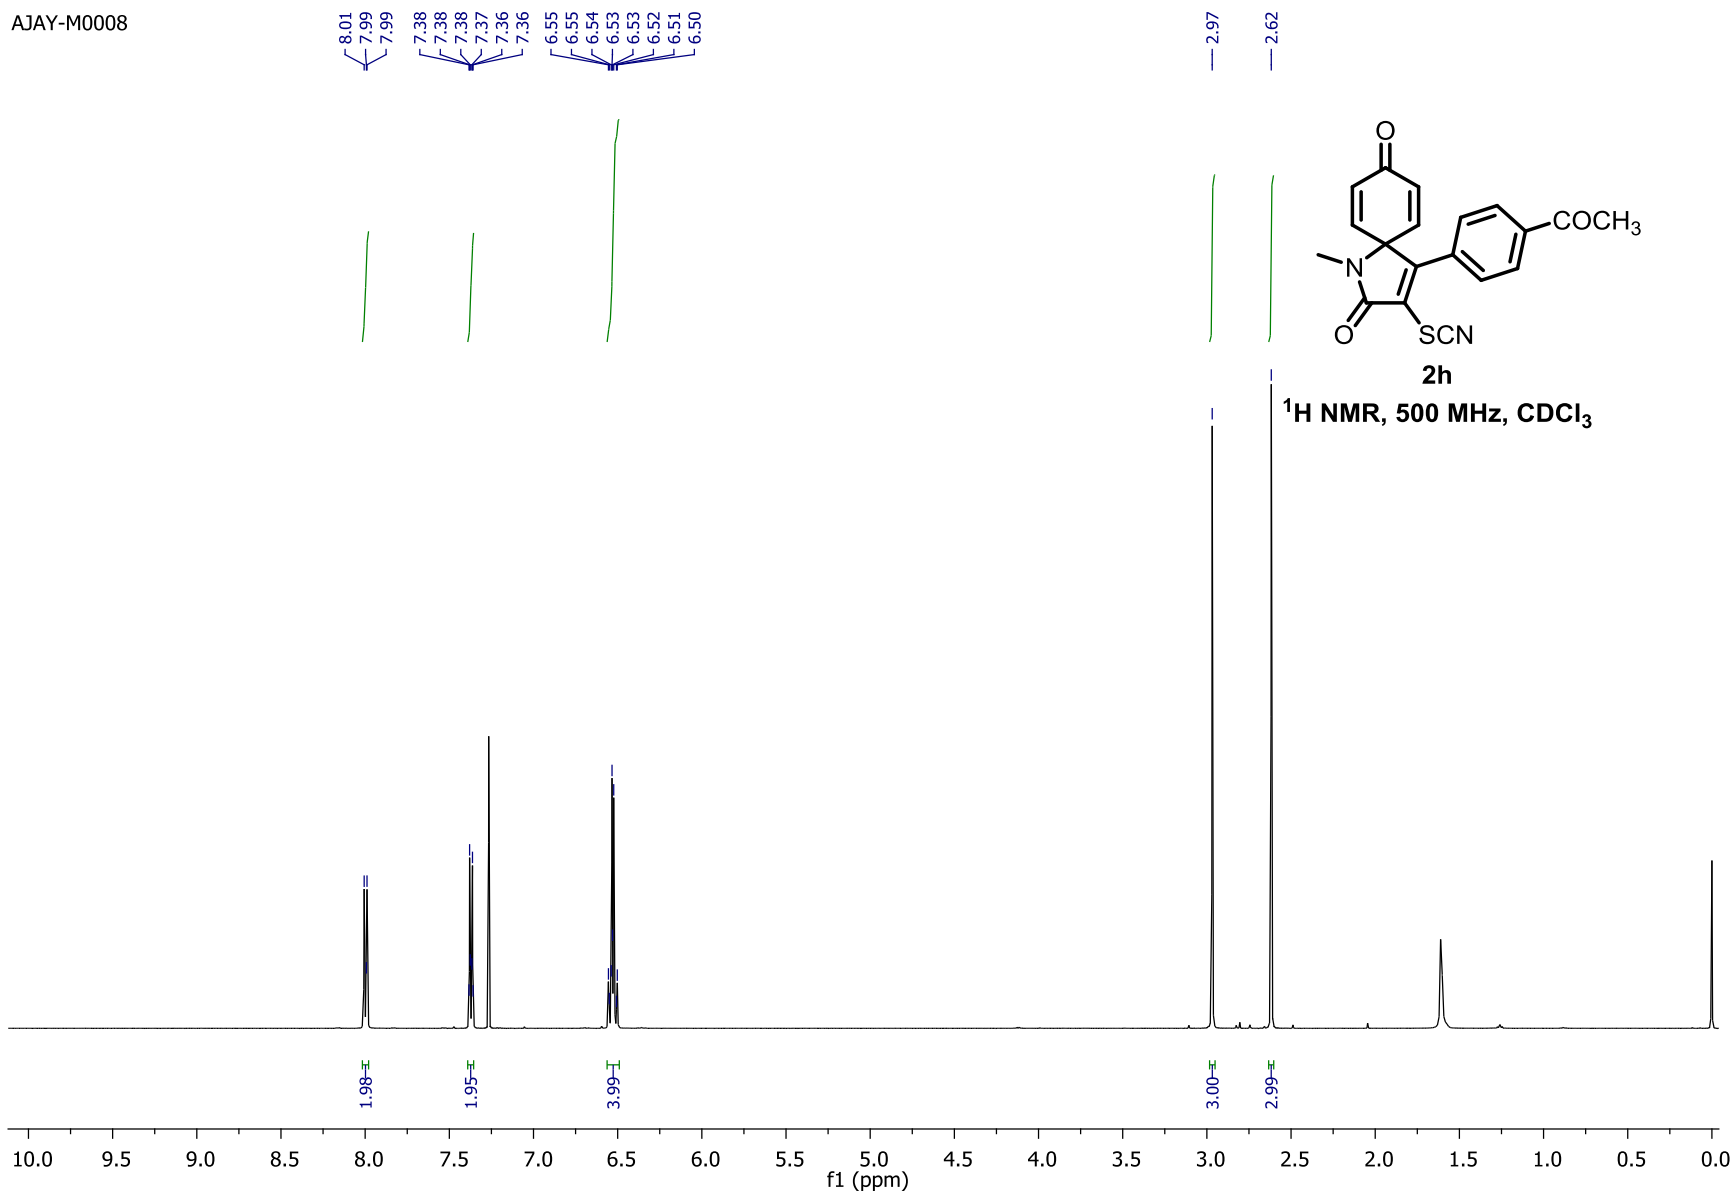



AJAY-M0009

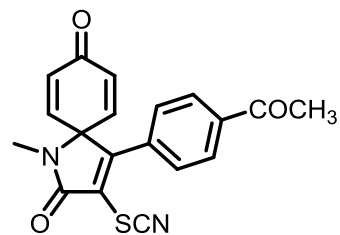

2h

$^{13}\text{C}$  NMR, 101 MHz,  $\text{CDCl}_3$

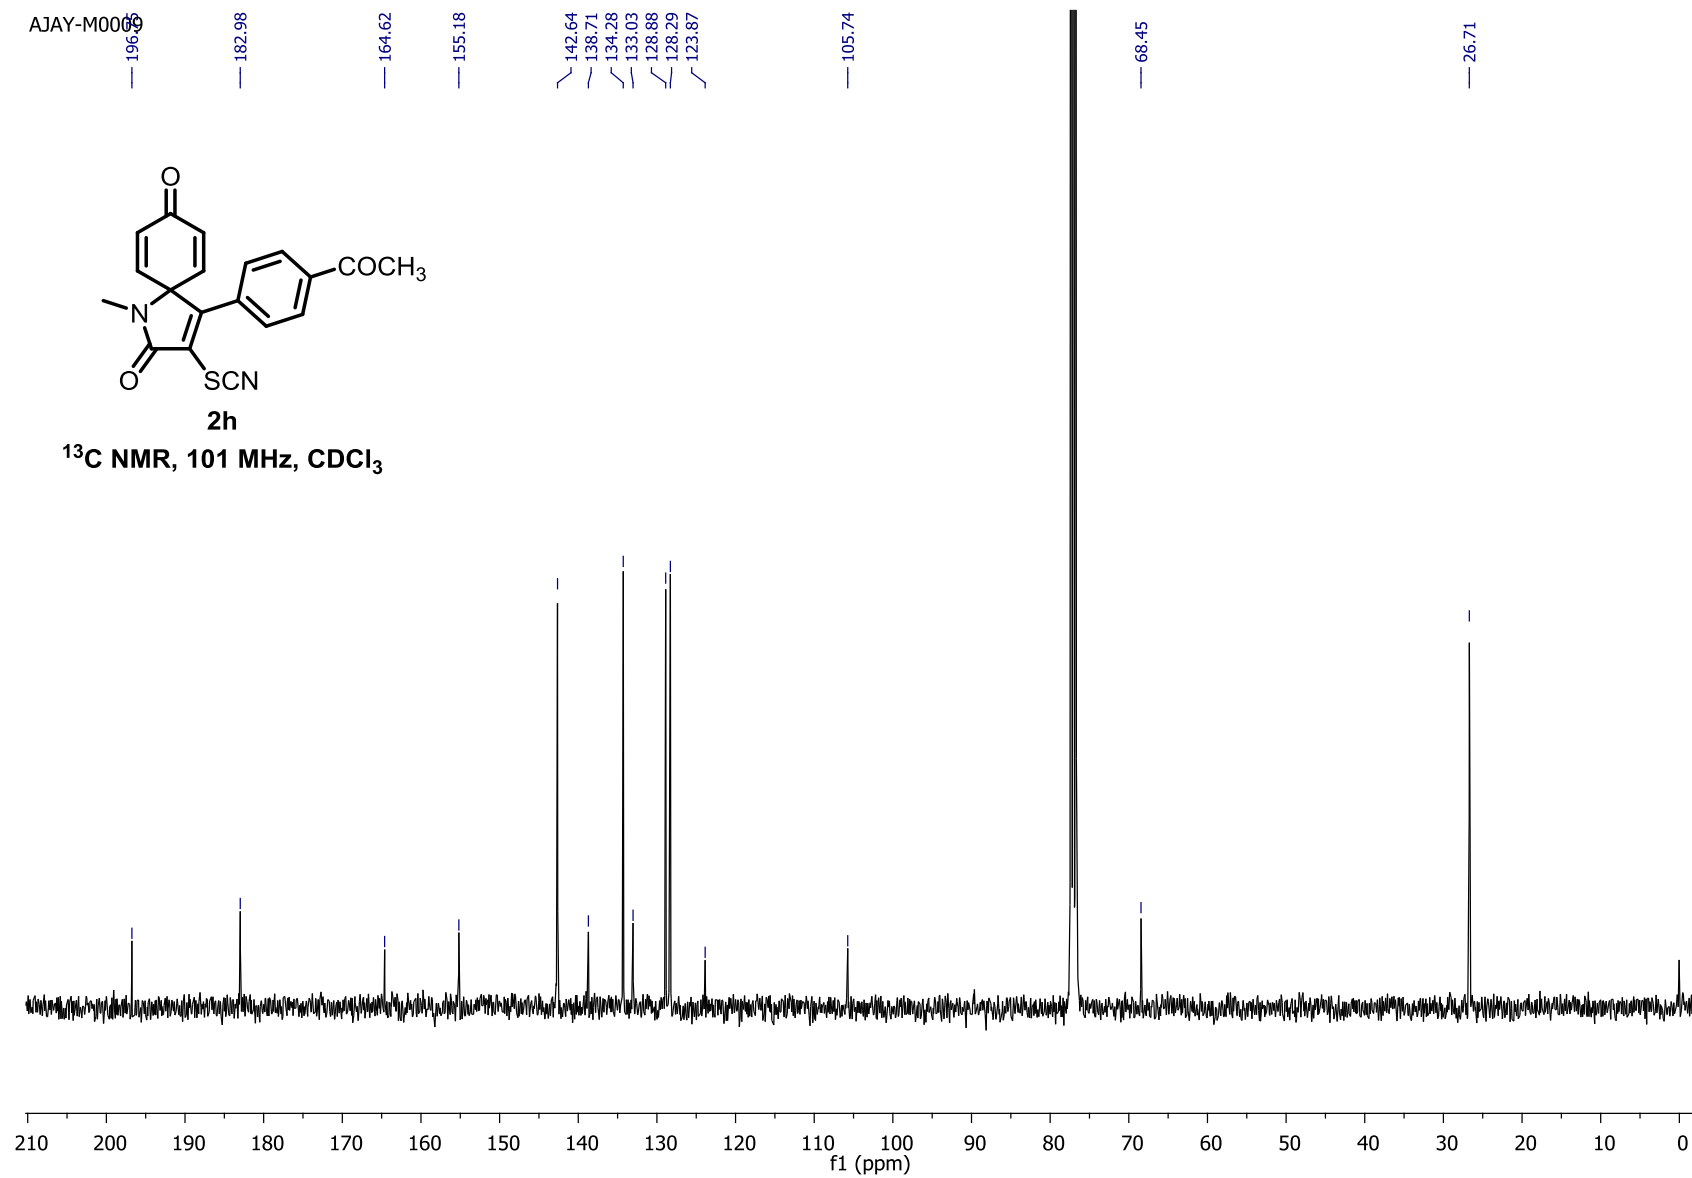

AJAY-M0009

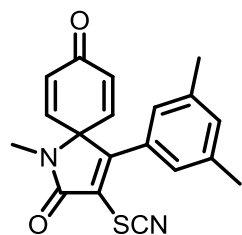

2i

$^1\text{H}$  NMR, 500 MHz,  $\text{CDCl}_3$

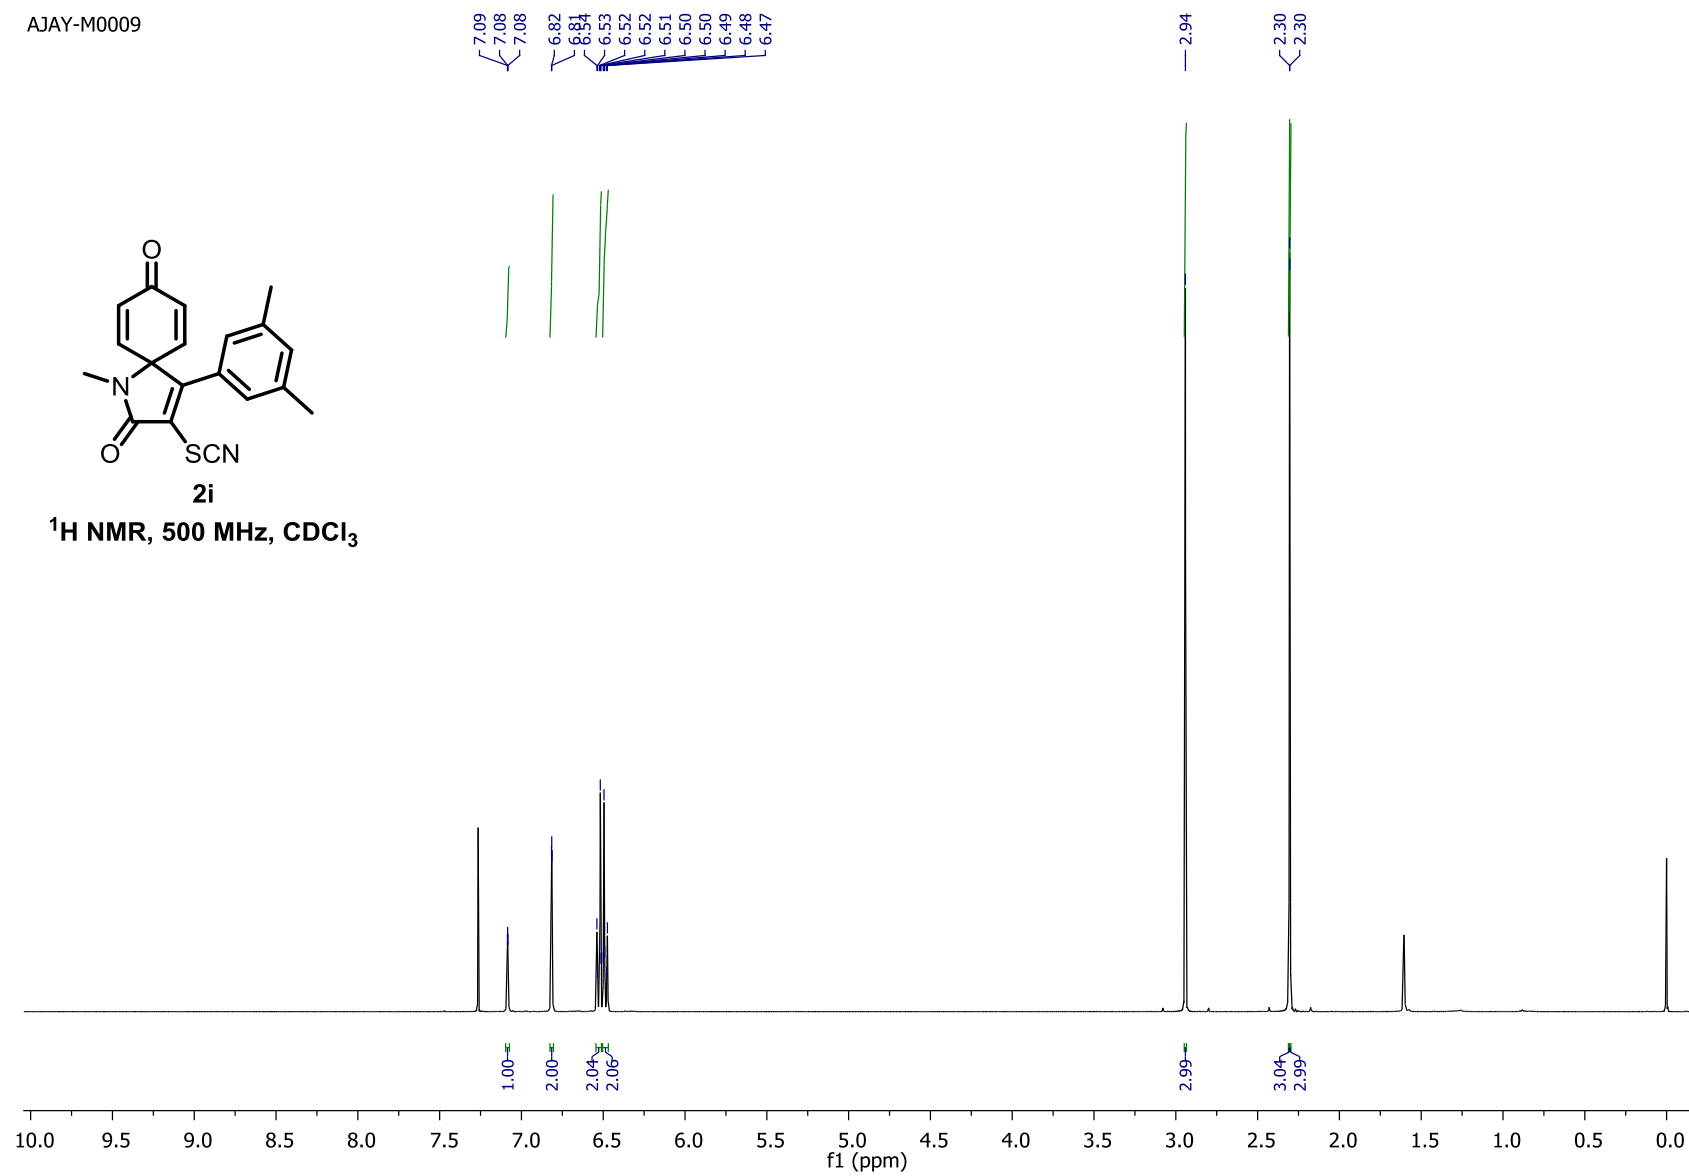

AJAY-M0009

— 183.45

— 165.04

— 157.65

— 143.24

— 138.88

— 133.86

— 132.88

— 128.86

— 125.34

— 121.91

— 106.46

— 68.32

— 26.58

— 21.35

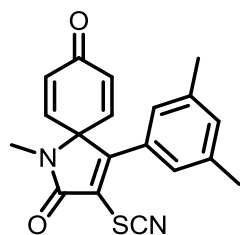

2i

$^{13}\text{C}$  NMR, 101 MHz,  $\text{CDCl}_3$

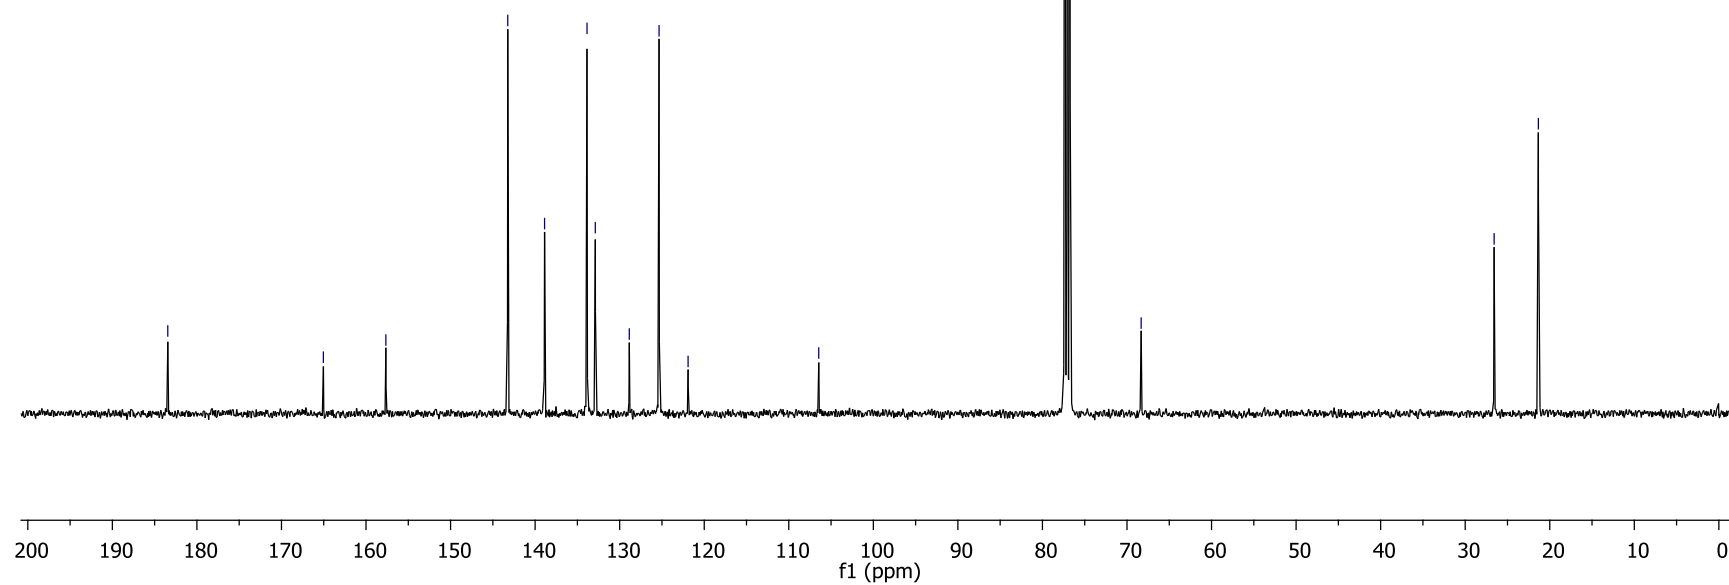

AJAY-M0009

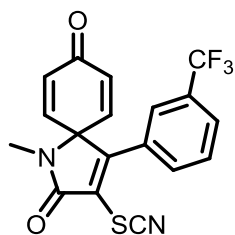

2j

$^1\text{H}$  NMR, 400 MHz,  $\text{CDCl}_3$

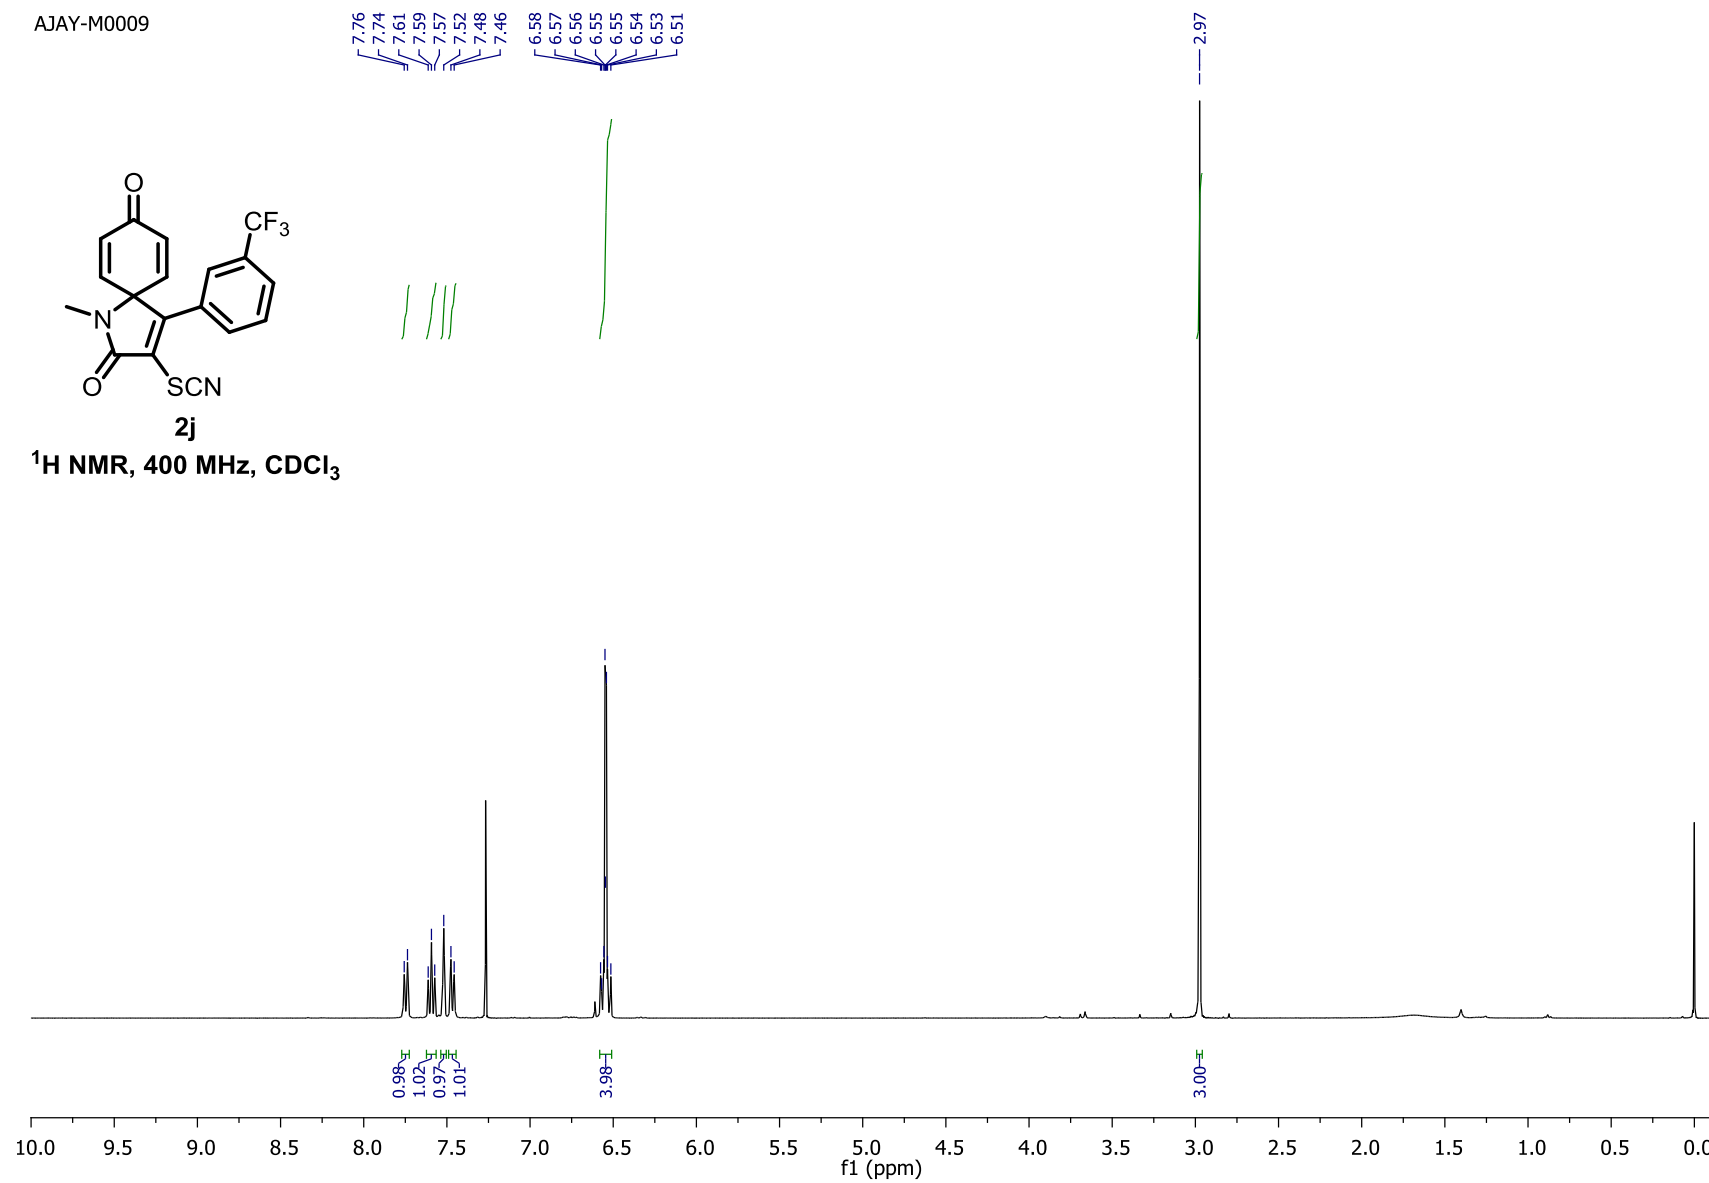

AJAY-M0009

— 182.90

— 164.55

— 154.49

— 142.57

134.37

131.81

131.48

131.17

129.86

129.57

127.78

124.88

124.84

124.20

121.94

— 105.63

— 68.53

— 26.73

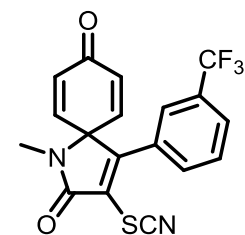

2j

<sup>13</sup>C NMR, 101 MHz, CDCl<sub>3</sub>

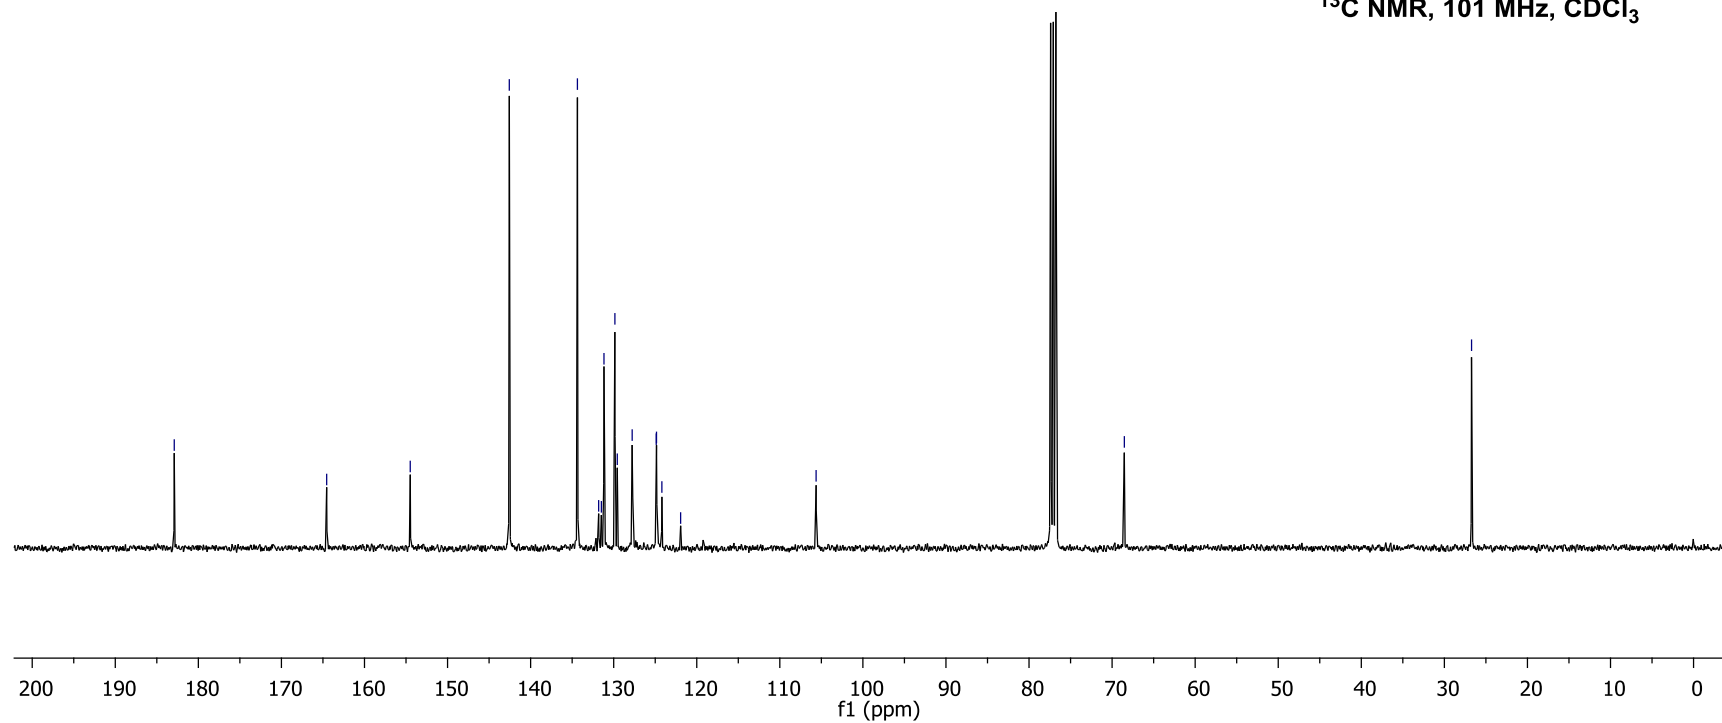

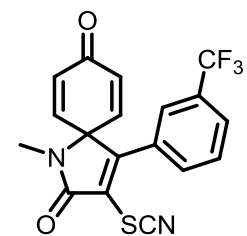

2j

$^{19}\text{F}$  NMR, 377 MHz,  $\text{CDCl}_3$

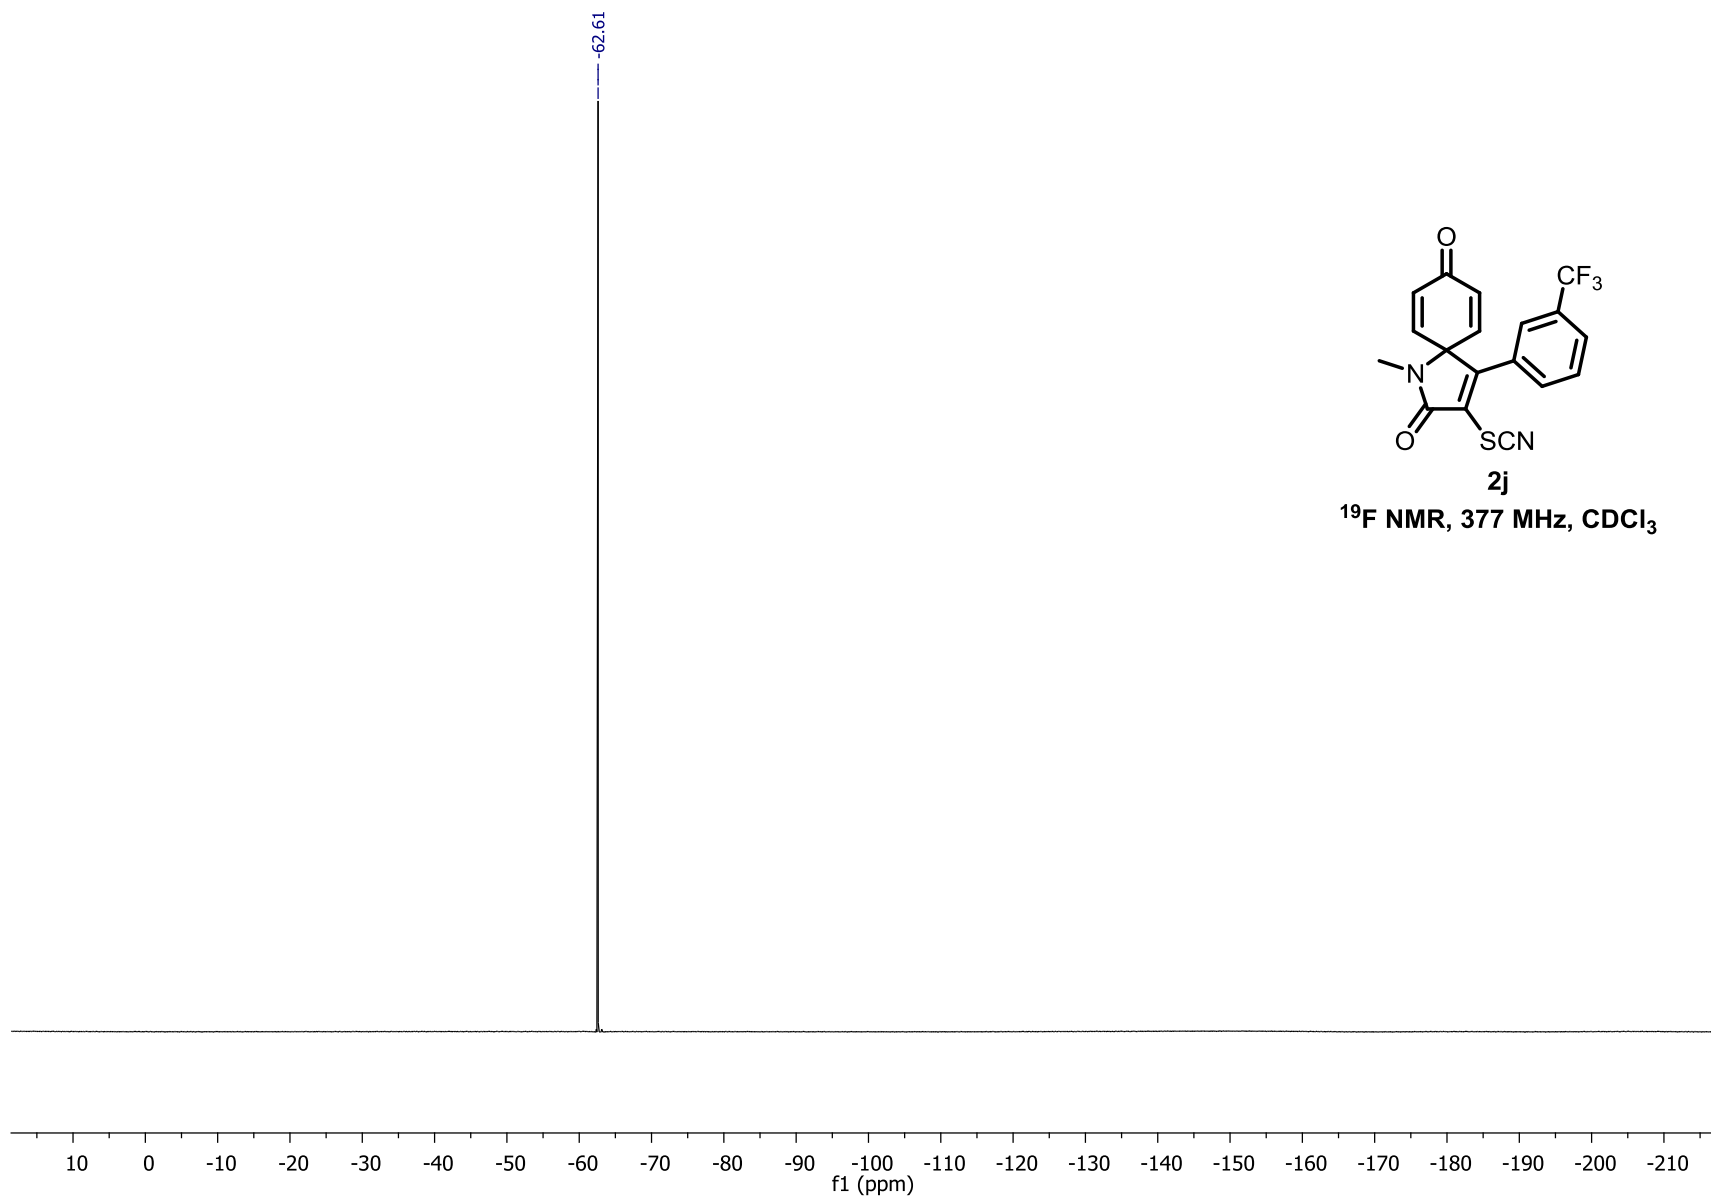

S30

AJAY-M0009

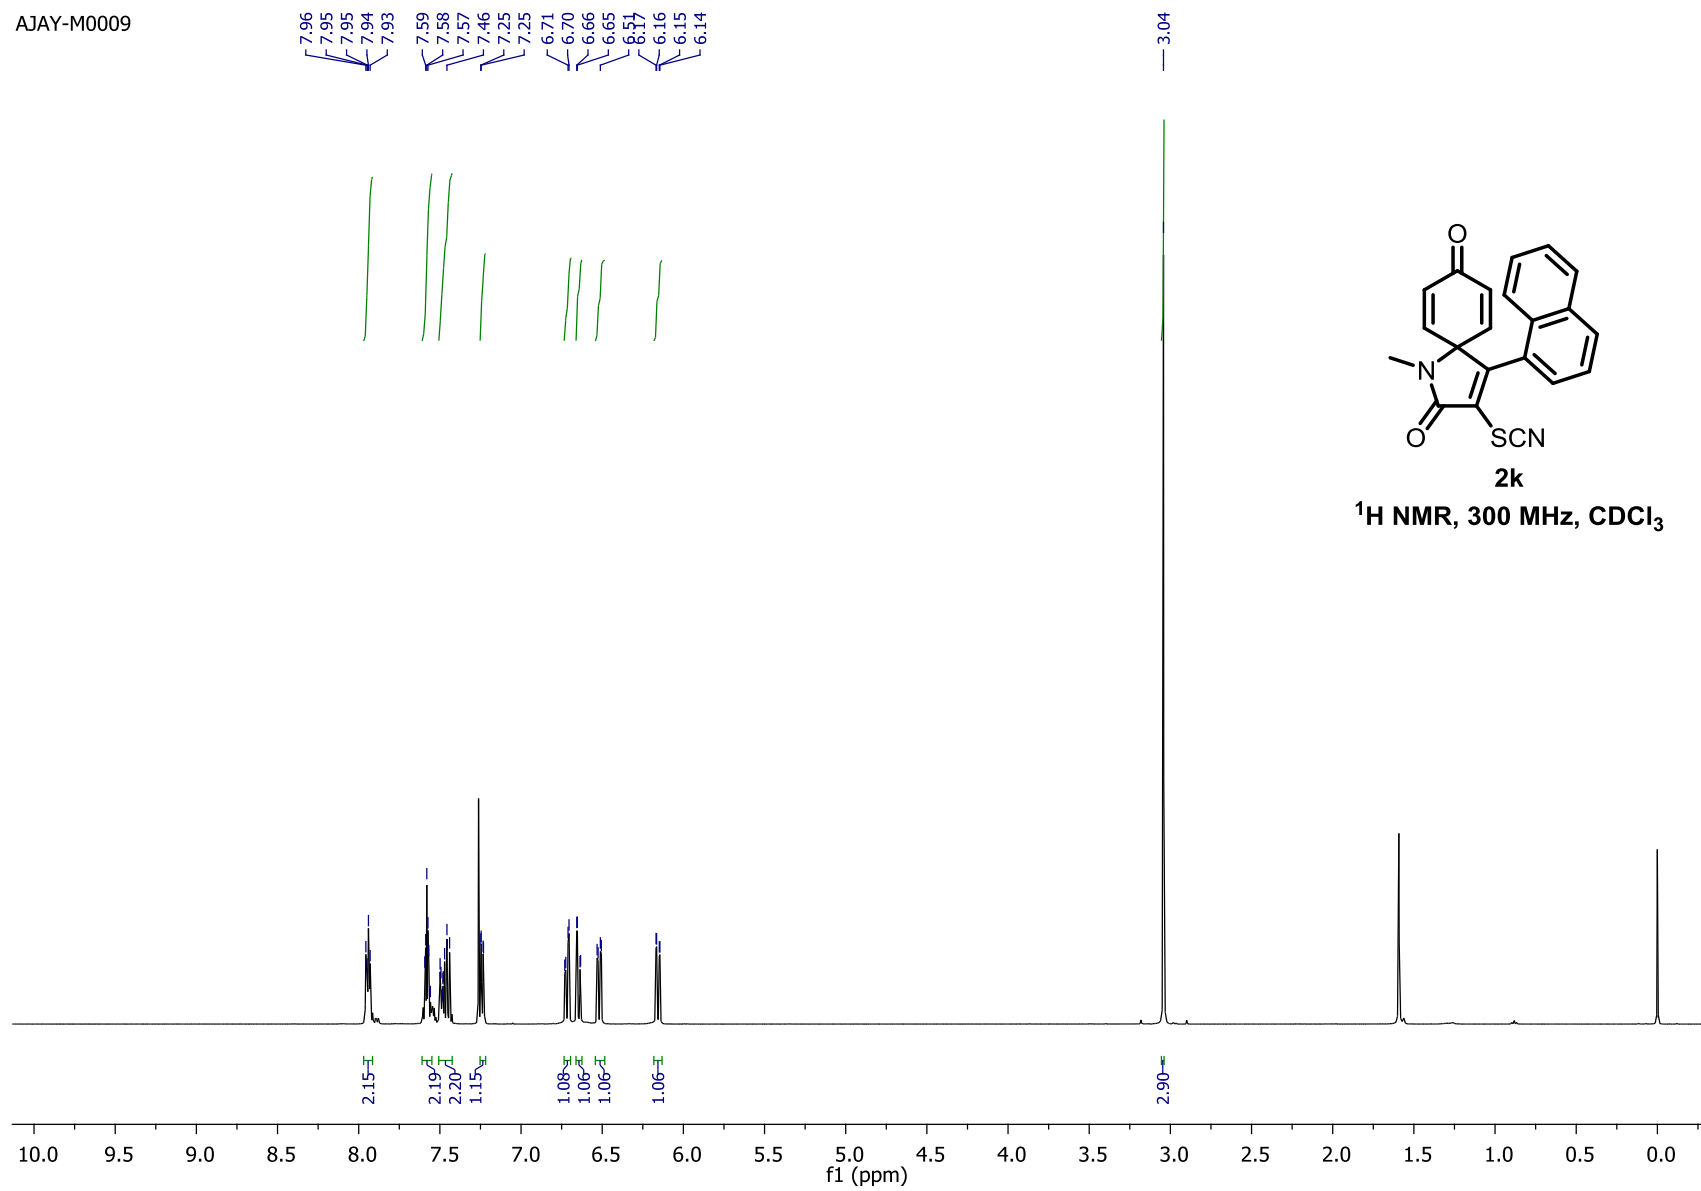

AJAY-M0009

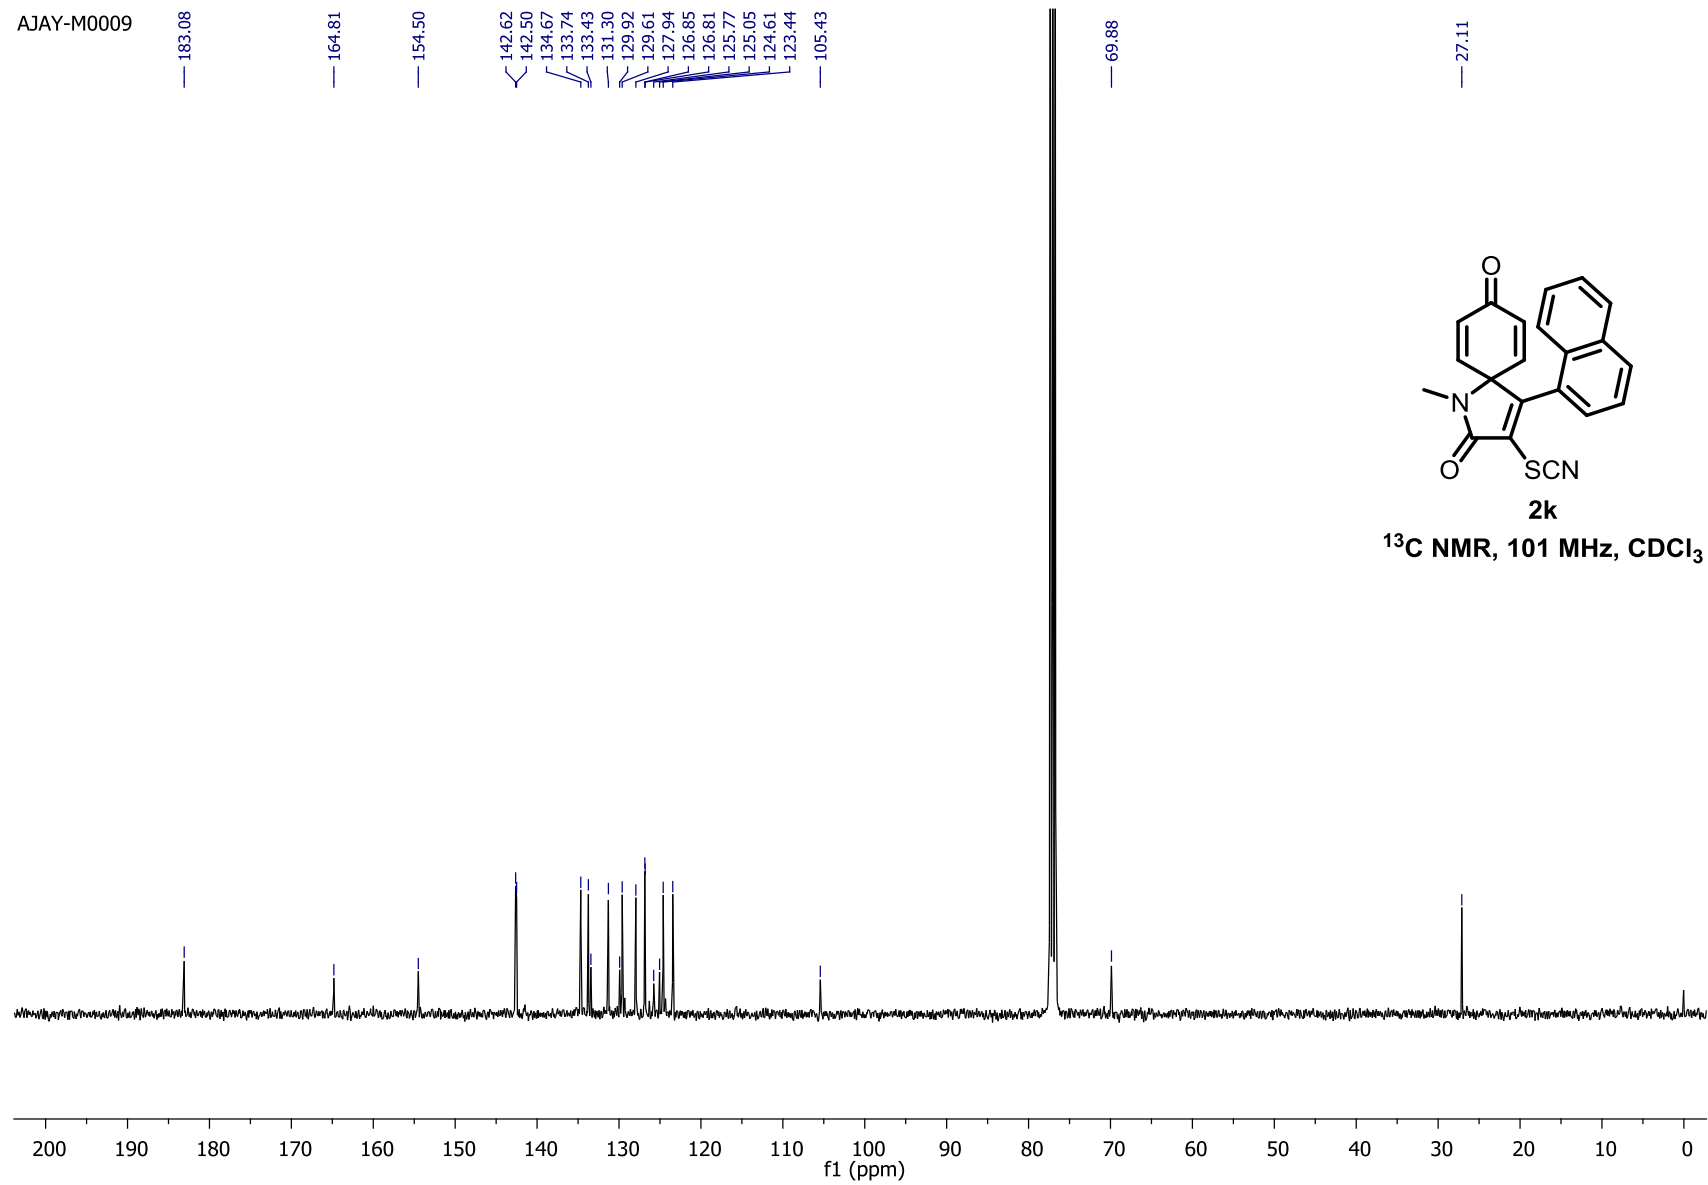



AJAY-M0009

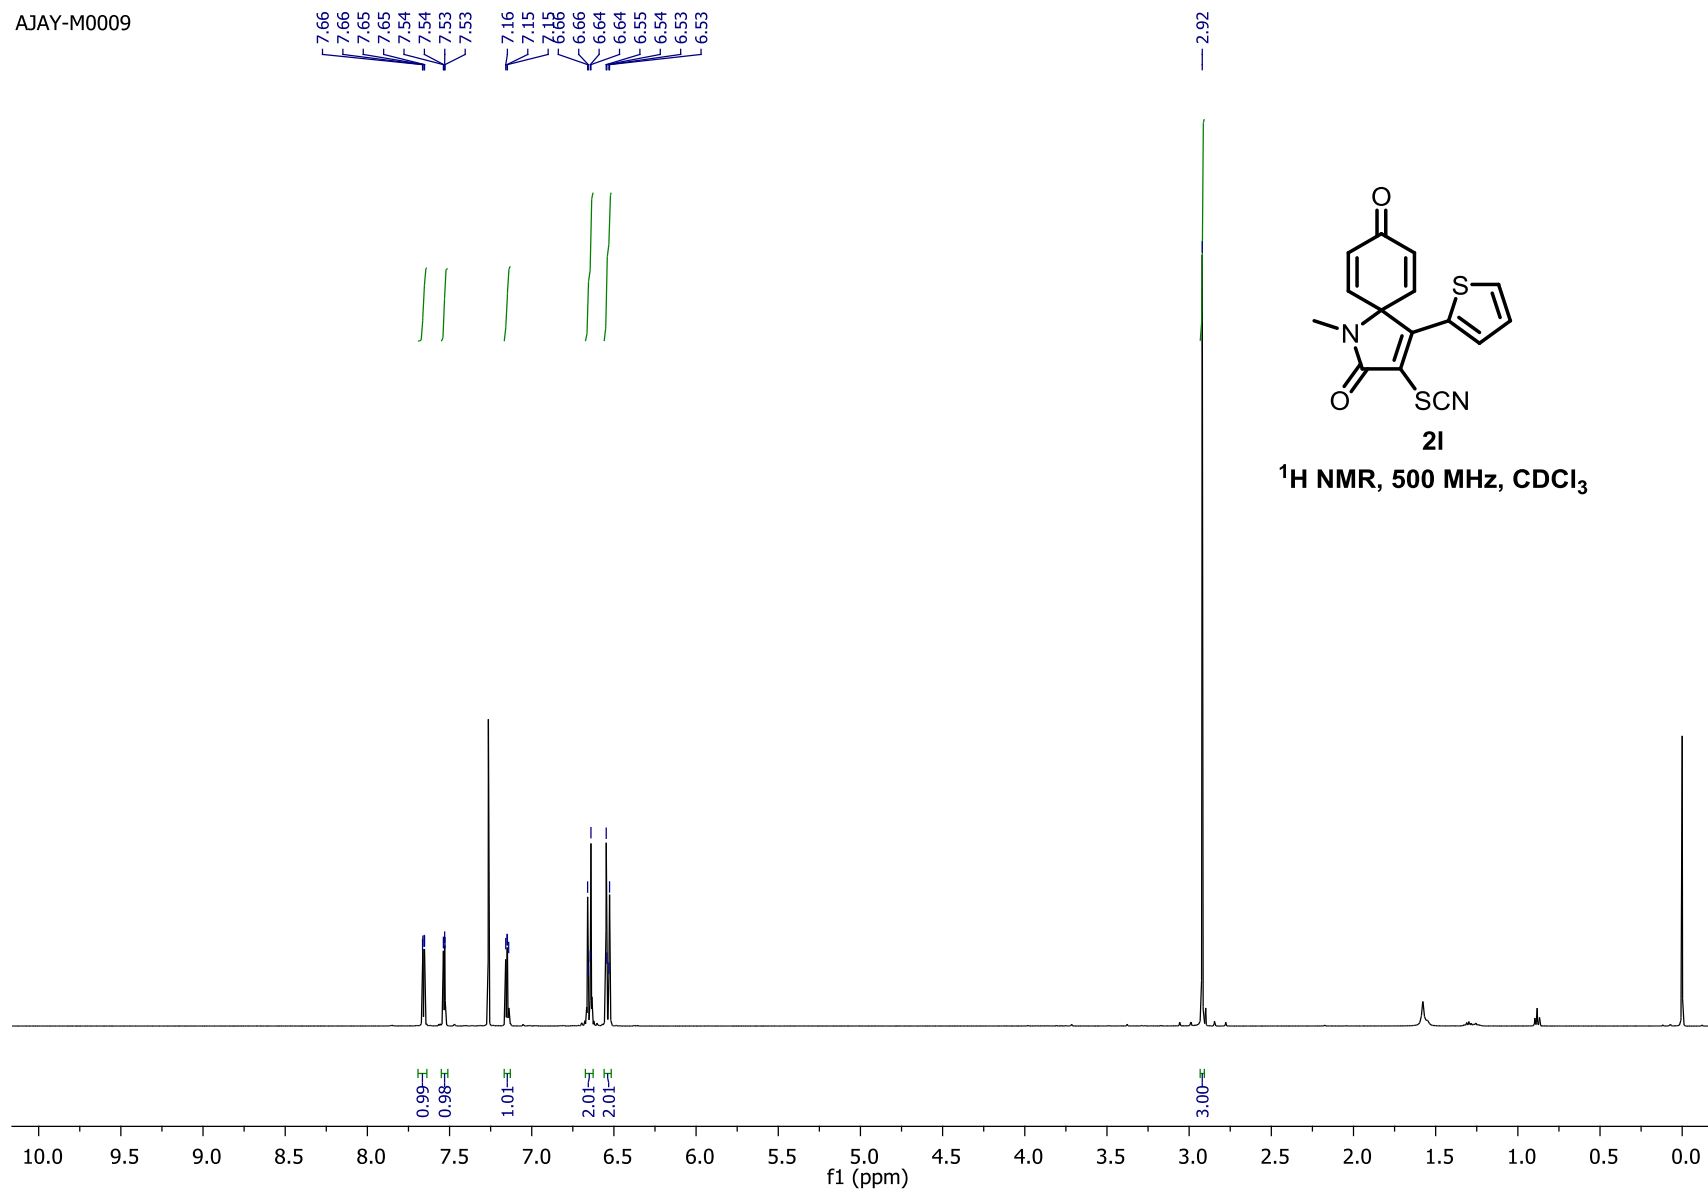

AJAY-M0009  
— 183.53

— 165.18

— 150.84

— 144.09

133.83

132.42

131.71

130.63

128.25

— 116.39

— 106.42

— 66.82

— 26.09

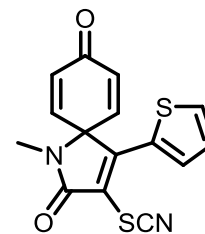

21

<sup>13</sup>C NMR, 101 MHz, CDCl<sub>3</sub>

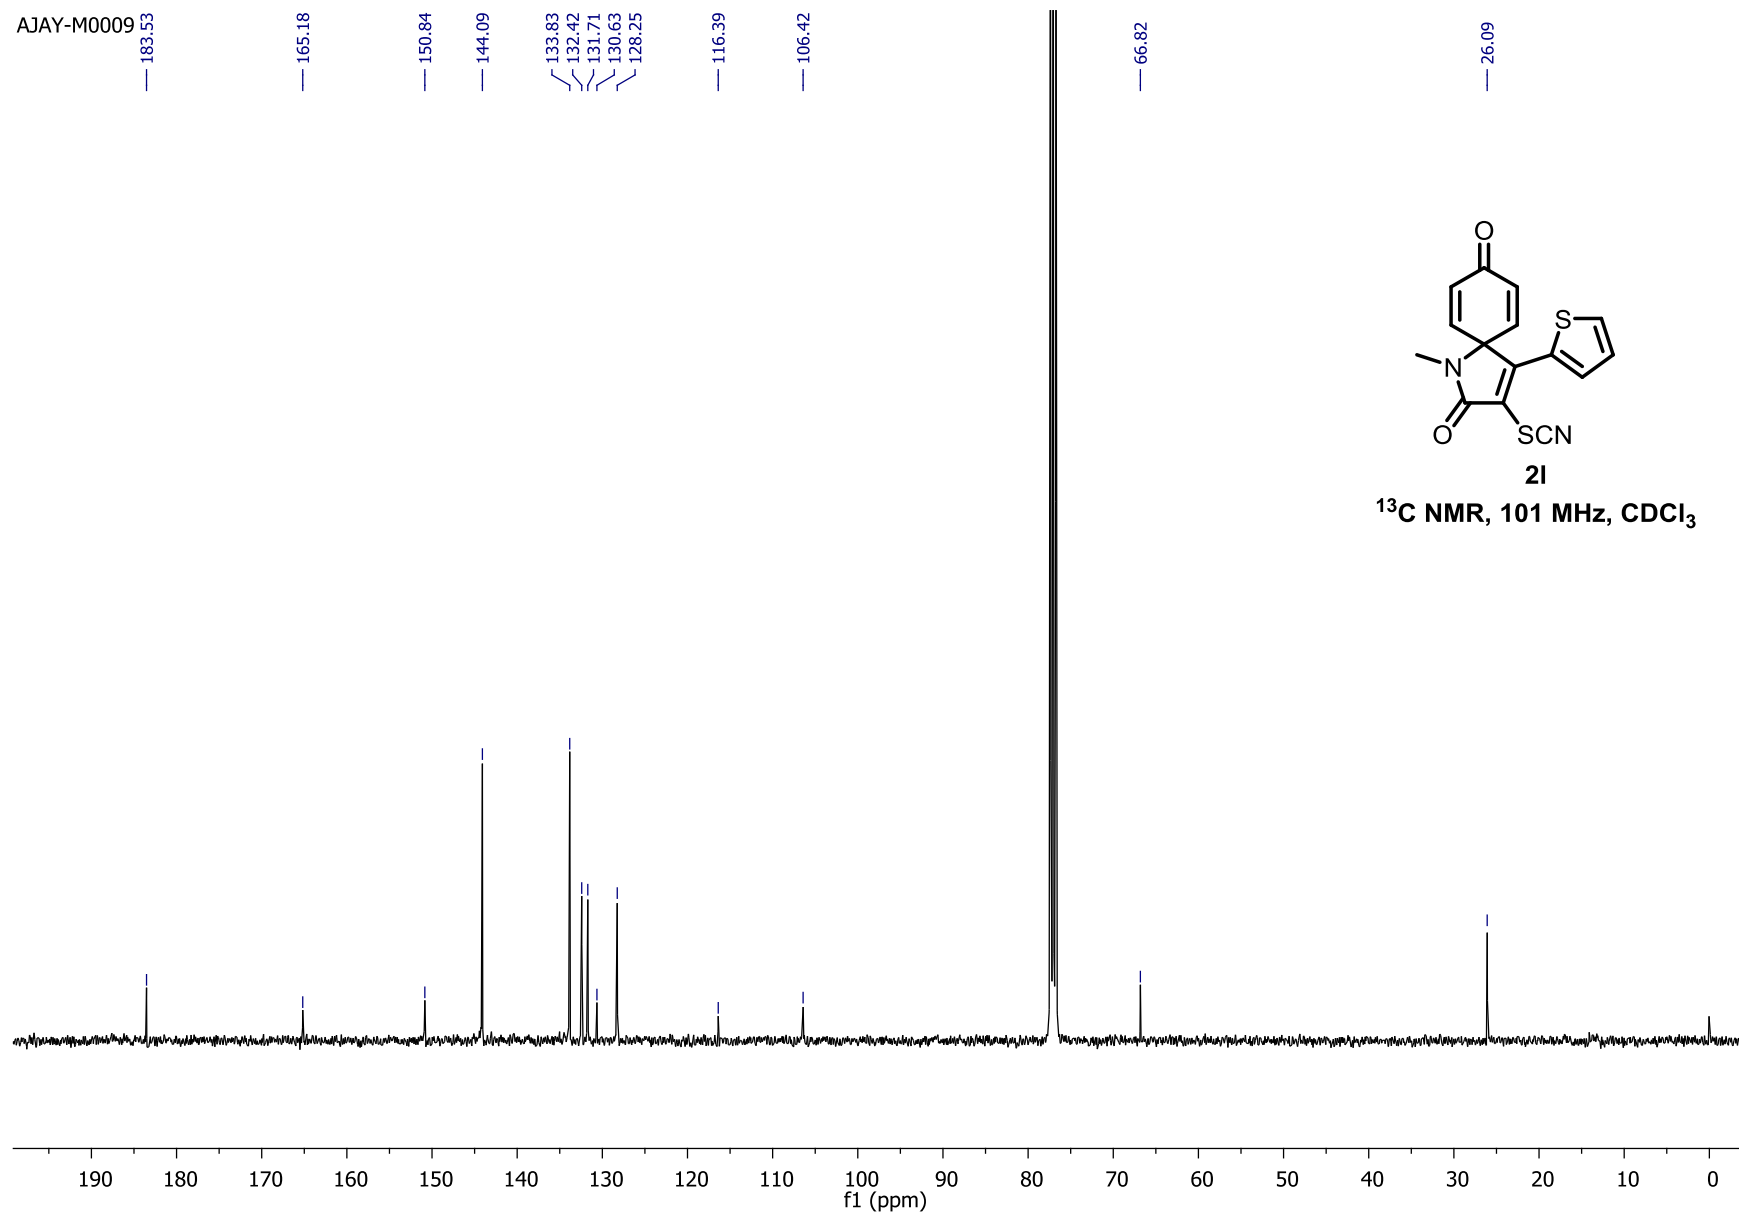

S34

AJAY

6.64  
6.63  
6.62  
6.61  
6.37  
6.37  
6.35  
6.35

2.92

2.06

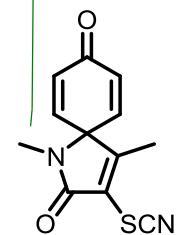

2m

$^1\text{H}$  NMR, 400 MHz,  $\text{CDCl}_3$

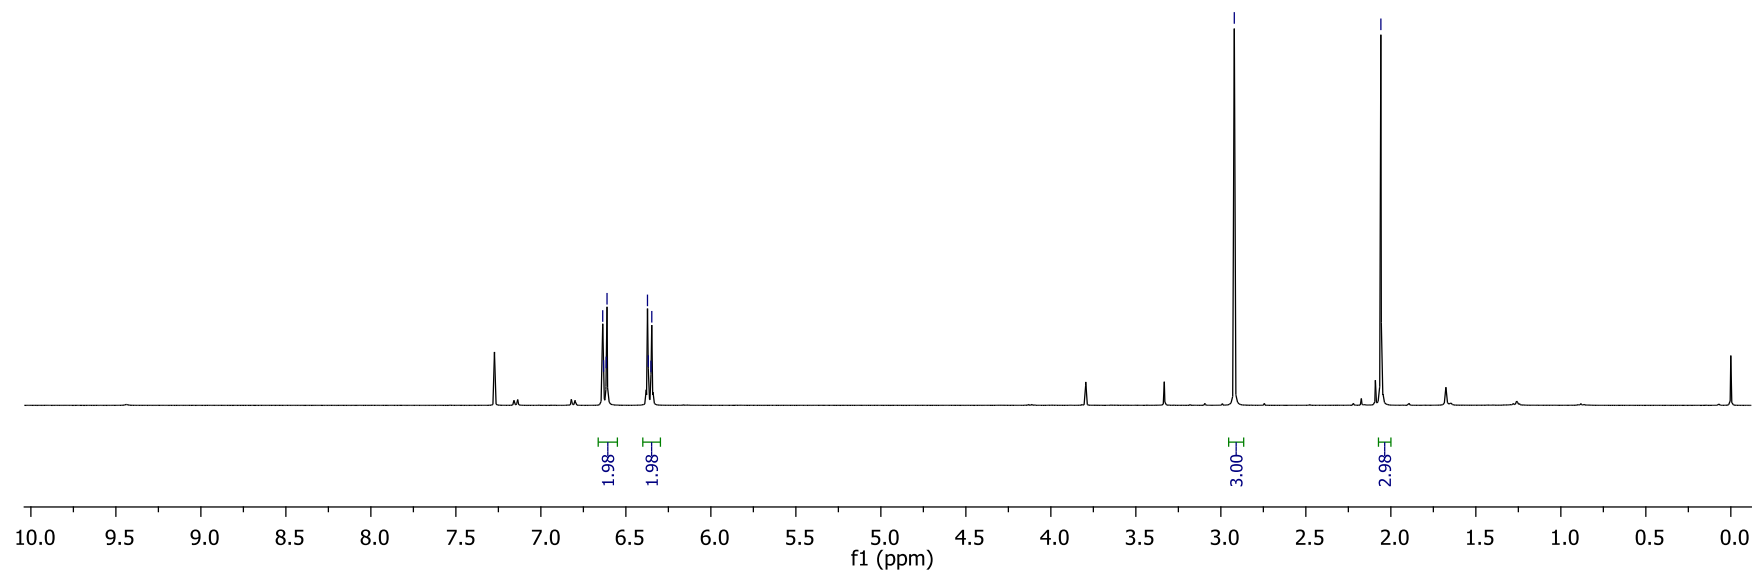

S35

AJAY

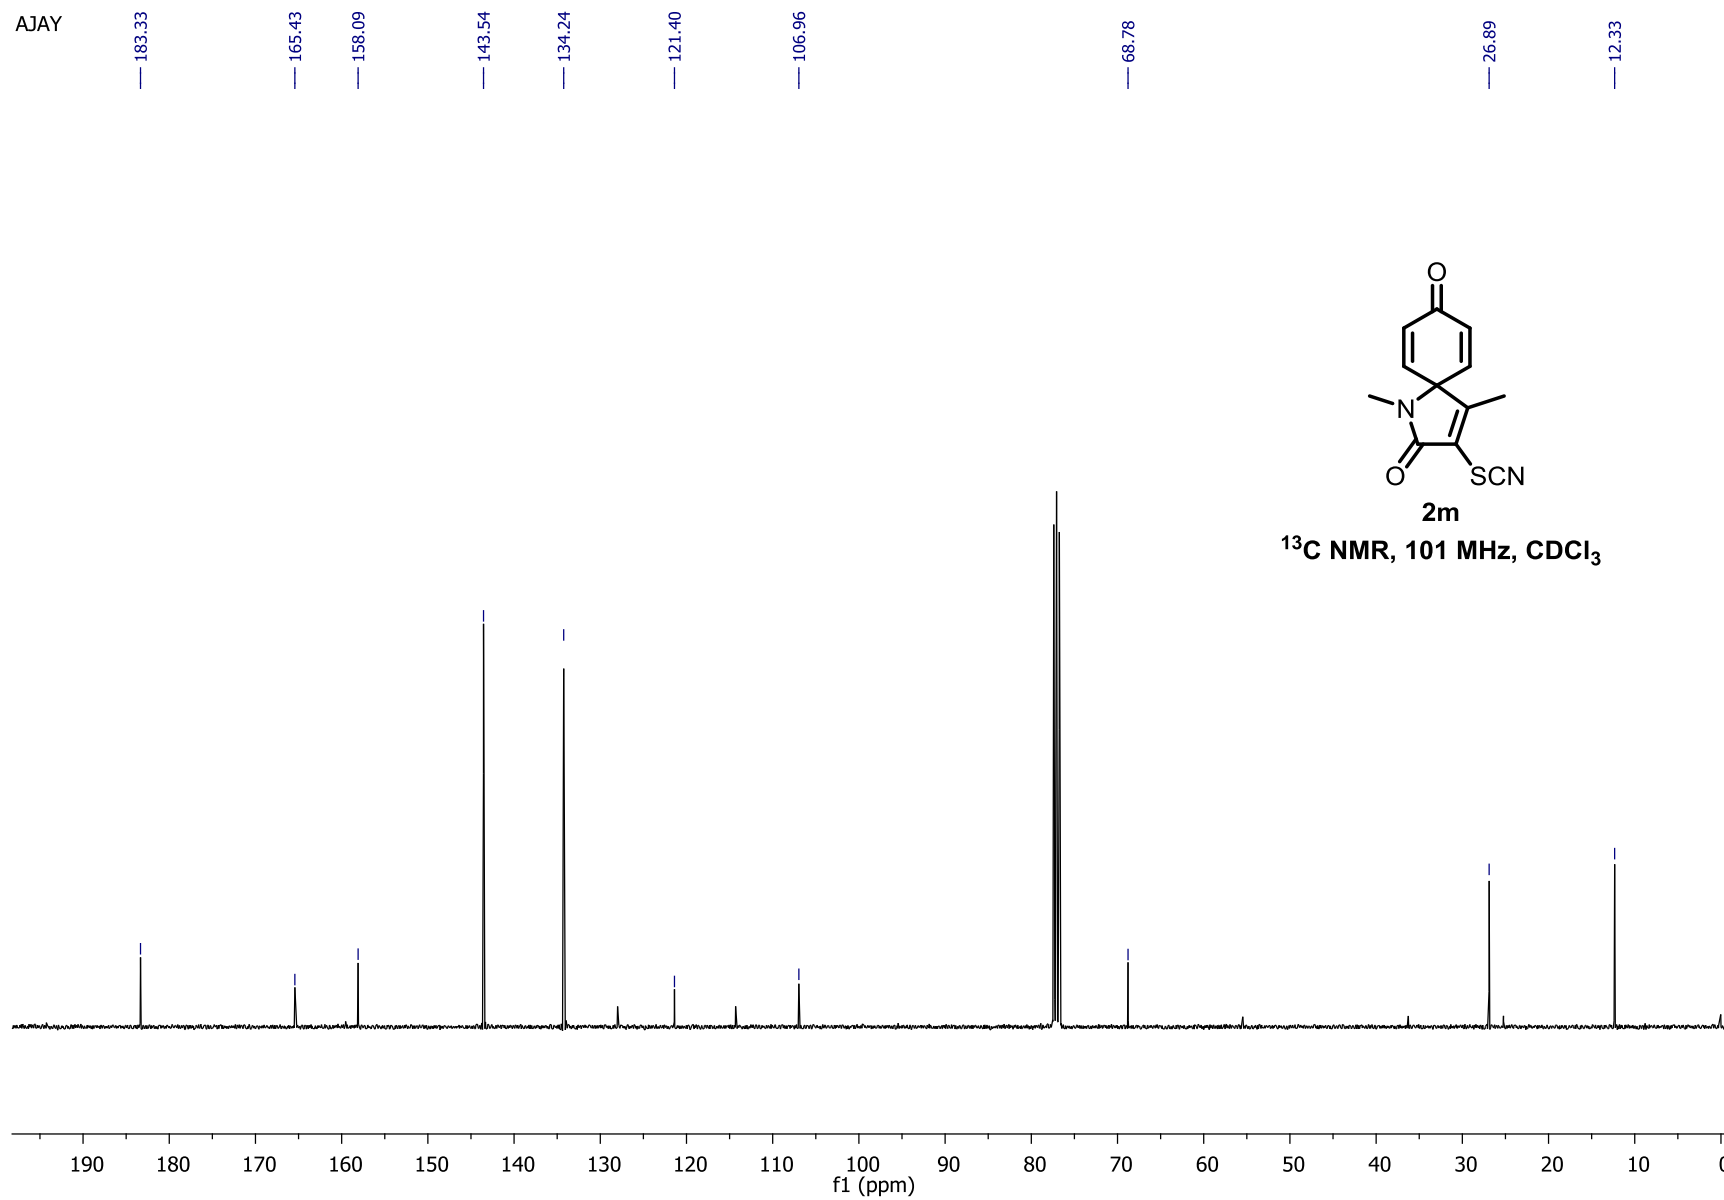

AJAY

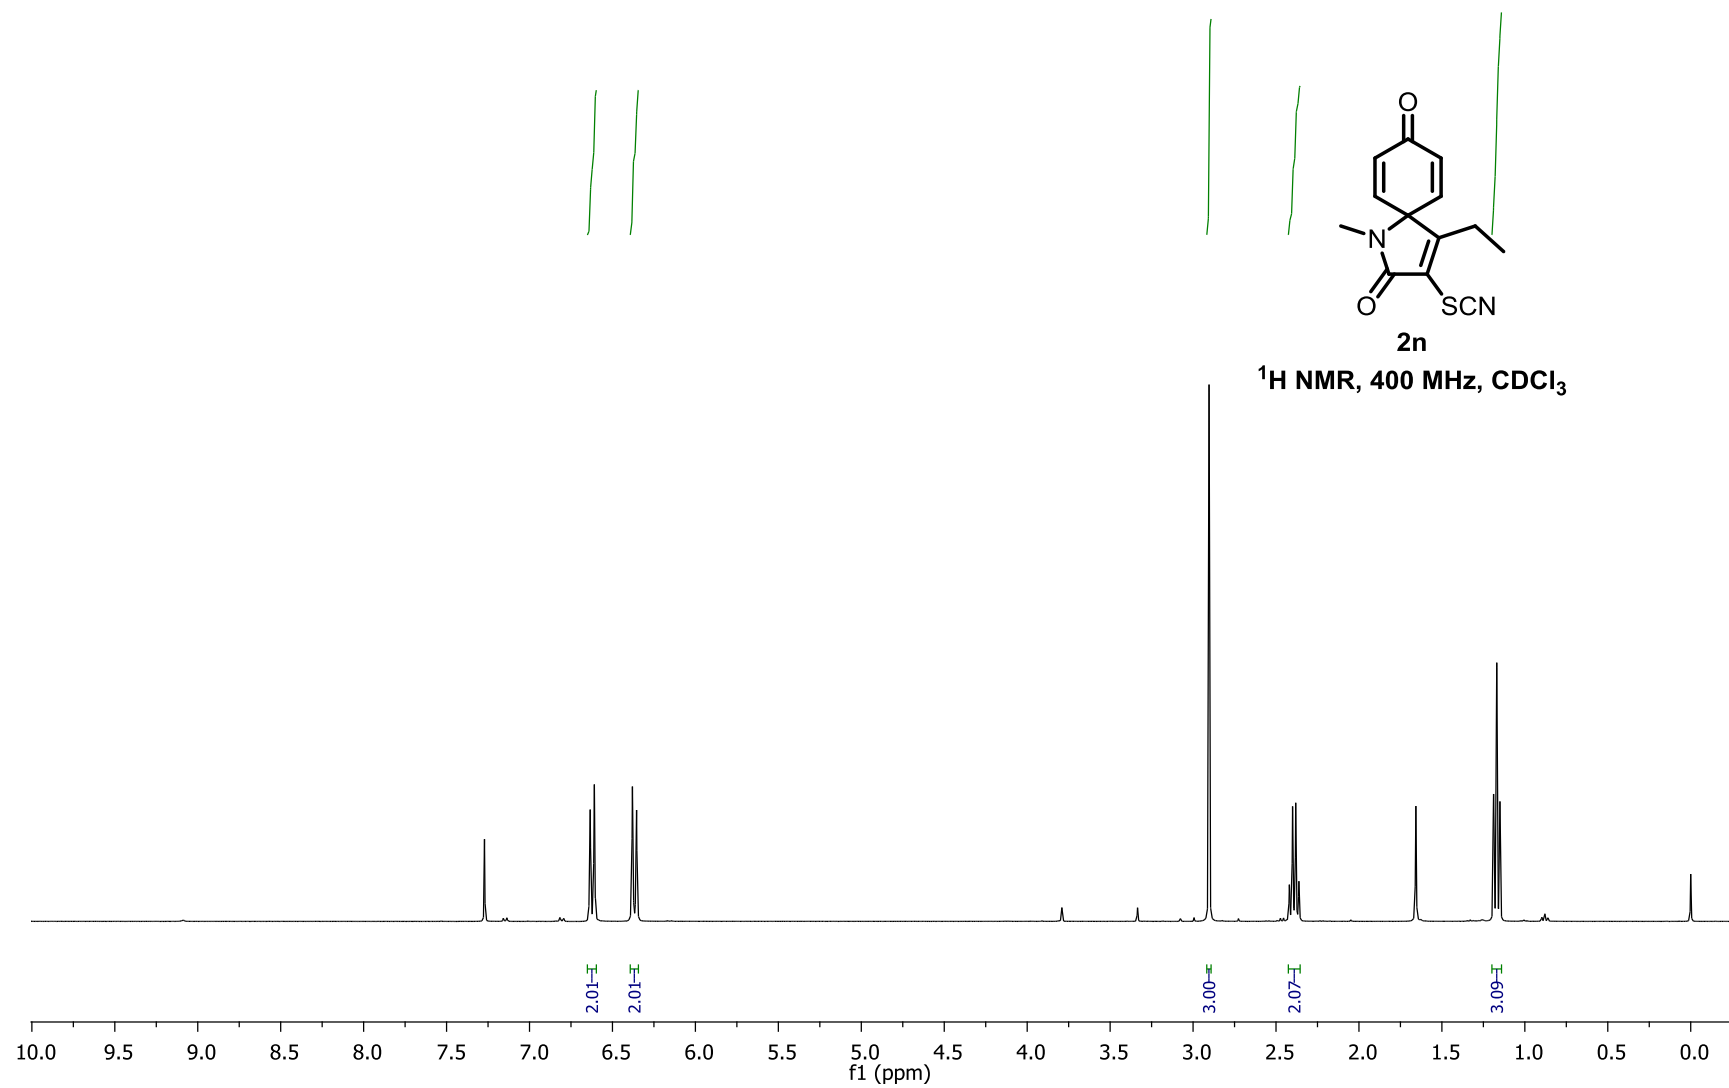

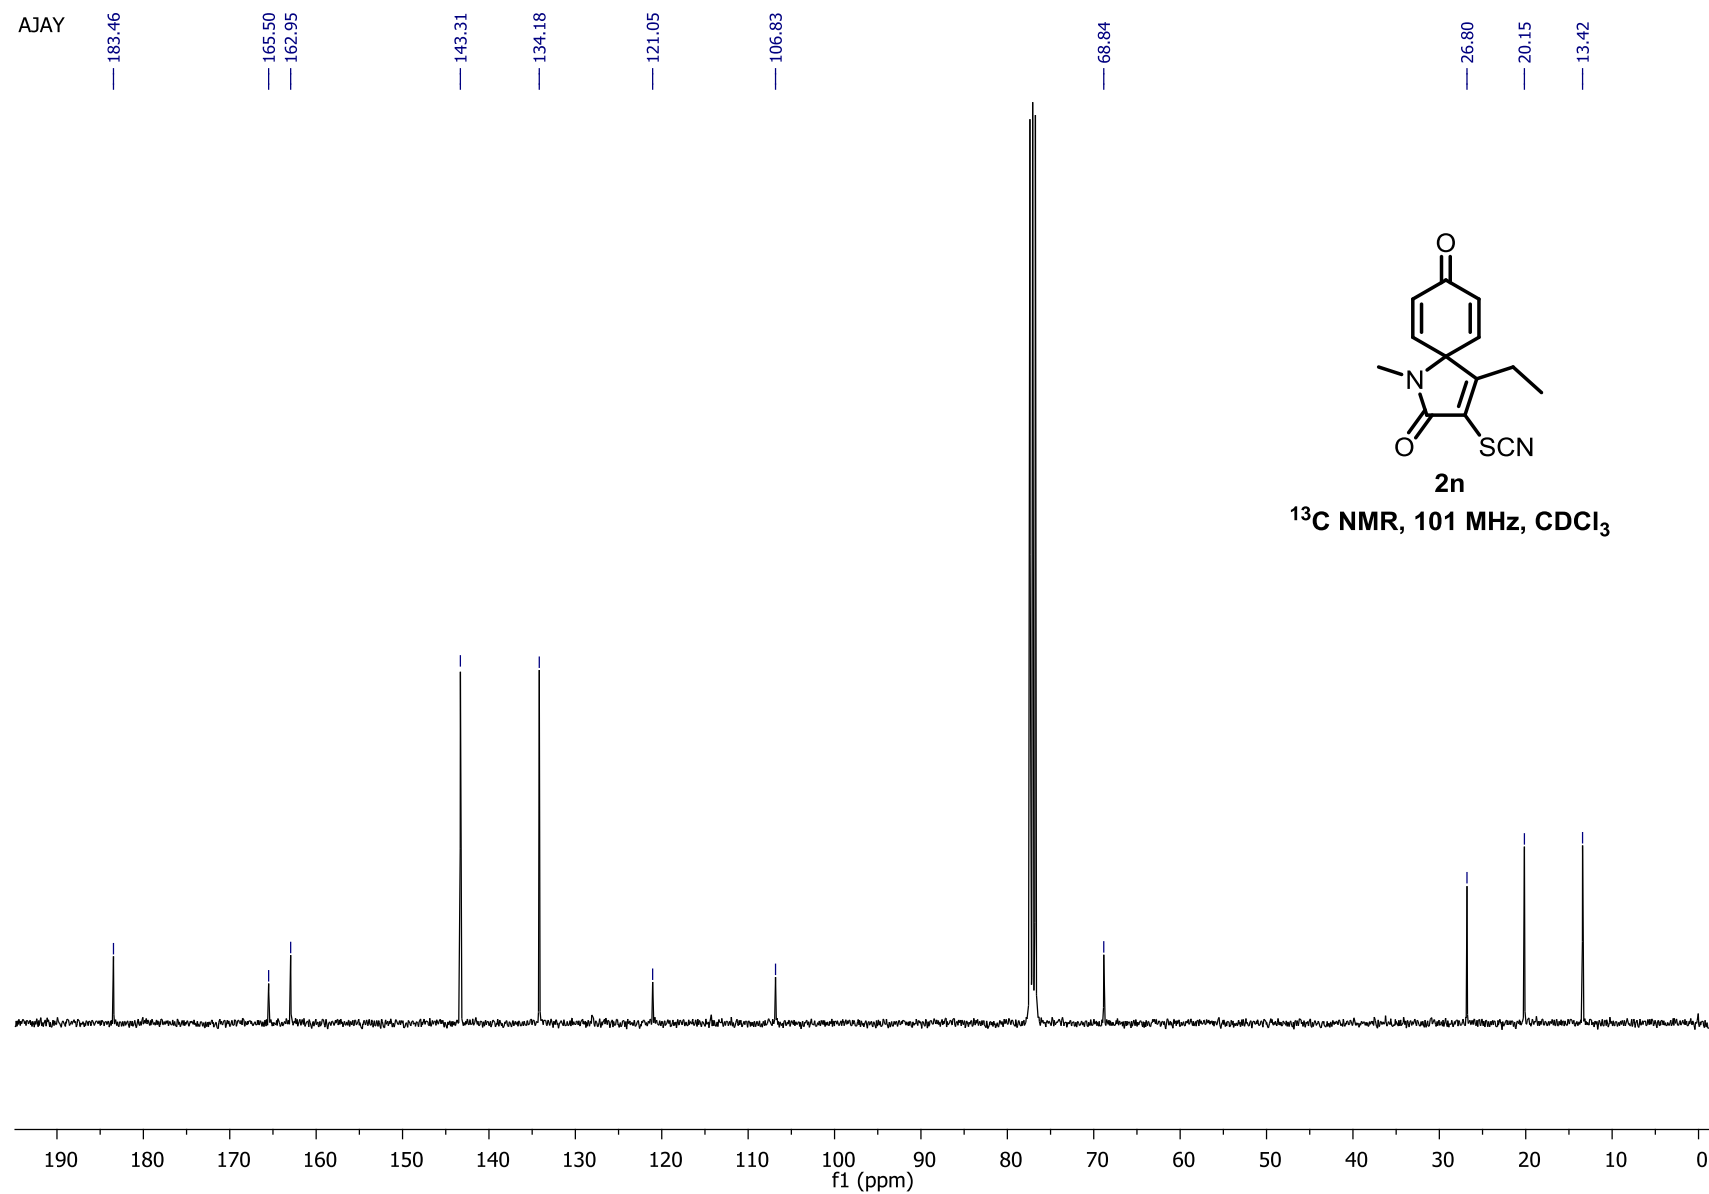

DATA F1 140000

7.74 7.73 7.72 7.71 7.70 7.69 7.68 7.67 7.66 7.65 7.64 7.63 7.62 7.61 7.60 7.59 7.58 7.57 7.56 7.55 7.54 7.53 7.52 7.51 7.50 7.49 7.48 7.47 7.46 7.45 7.44 7.43 7.42 7.41 7.40 7.39 7.38 7.37 7.36 7.35 7.34 7.33 7.32 7.31 7.30 7.29 7.28 7.27 7.26 7.25 7.24 7.23 7.22 7.21 7.20 7.19 7.18 7.17 7.16 7.15 7.14 7.13 7.12 7.11 7.10 7.09 7.08 7.07 7.06 7.05 7.04 7.03 7.02 7.01 7.00 6.99 6.98 6.97 6.96 6.95 6.94 6.93 6.92 6.91 6.90 6.89 6.88 6.87 6.86 6.85 6.84 6.83 6.82 6.81 6.80 6.79 6.78 6.77 6.76 6.75 6.74 6.73 6.72 6.71 6.70 6.69 6.68 6.67 6.66 6.65 6.64 6.63 6.62 6.61 6.60 6.59 6.58 6.57 6.56 6.55 6.54 6.53 6.52 6.51 6.50 6.49 6.48 6.47 6.46 6.45 6.44 6.43 6.42 6.41 6.40 6.39 6.38 6.37 6.36 6.35 6.34 6.33 6.32 6.31 6.30 6.29 6.28

4.59

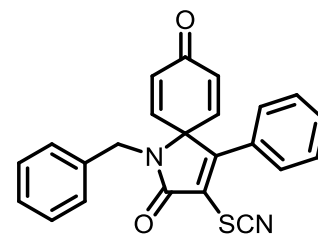

2o

<sup>1</sup>H NMR, 400 MHz, CDCl<sub>3</sub>

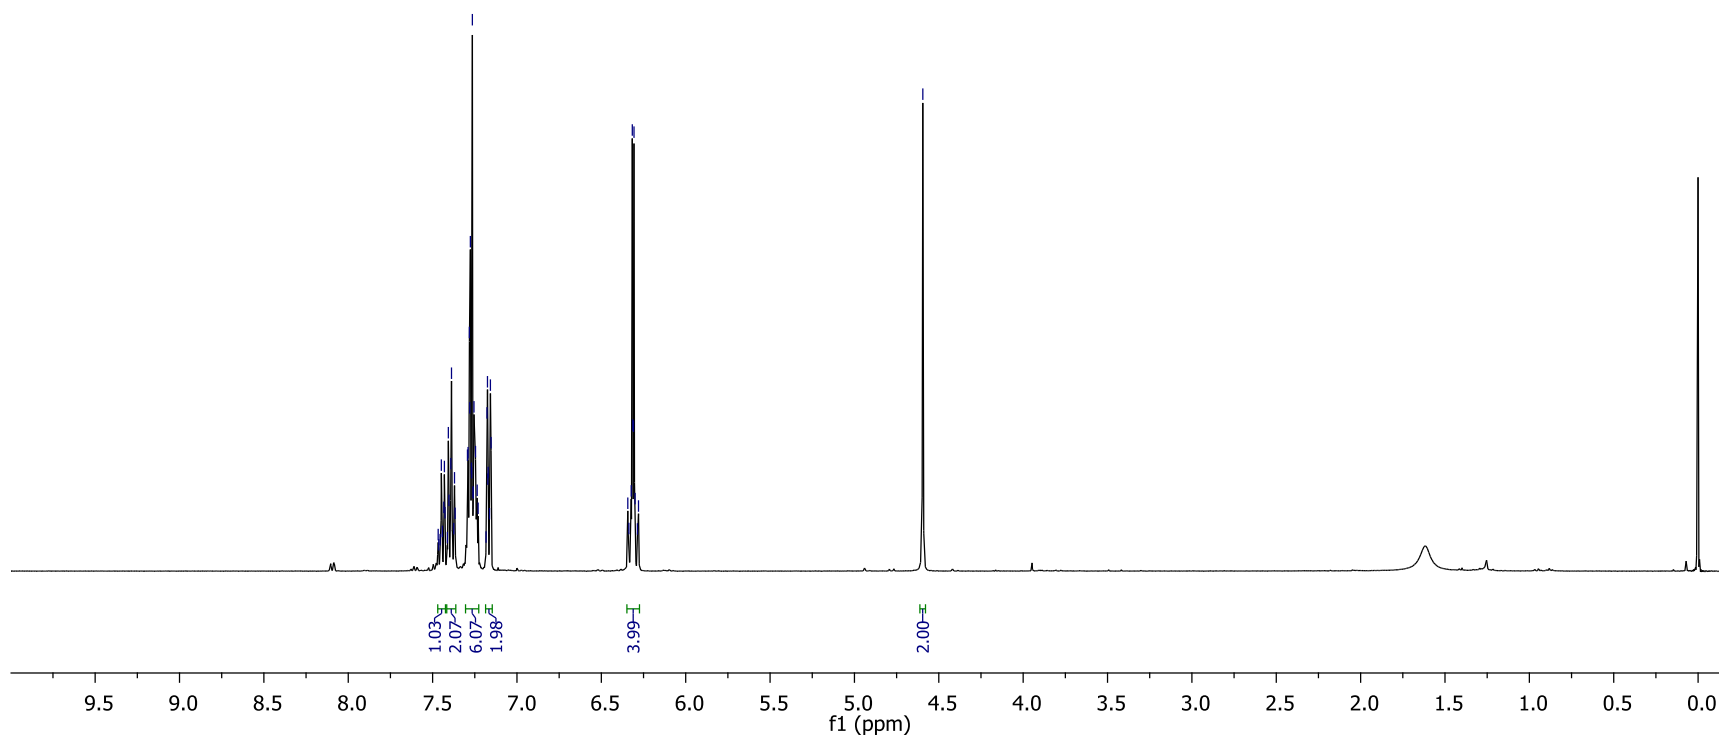

VASU-M0009

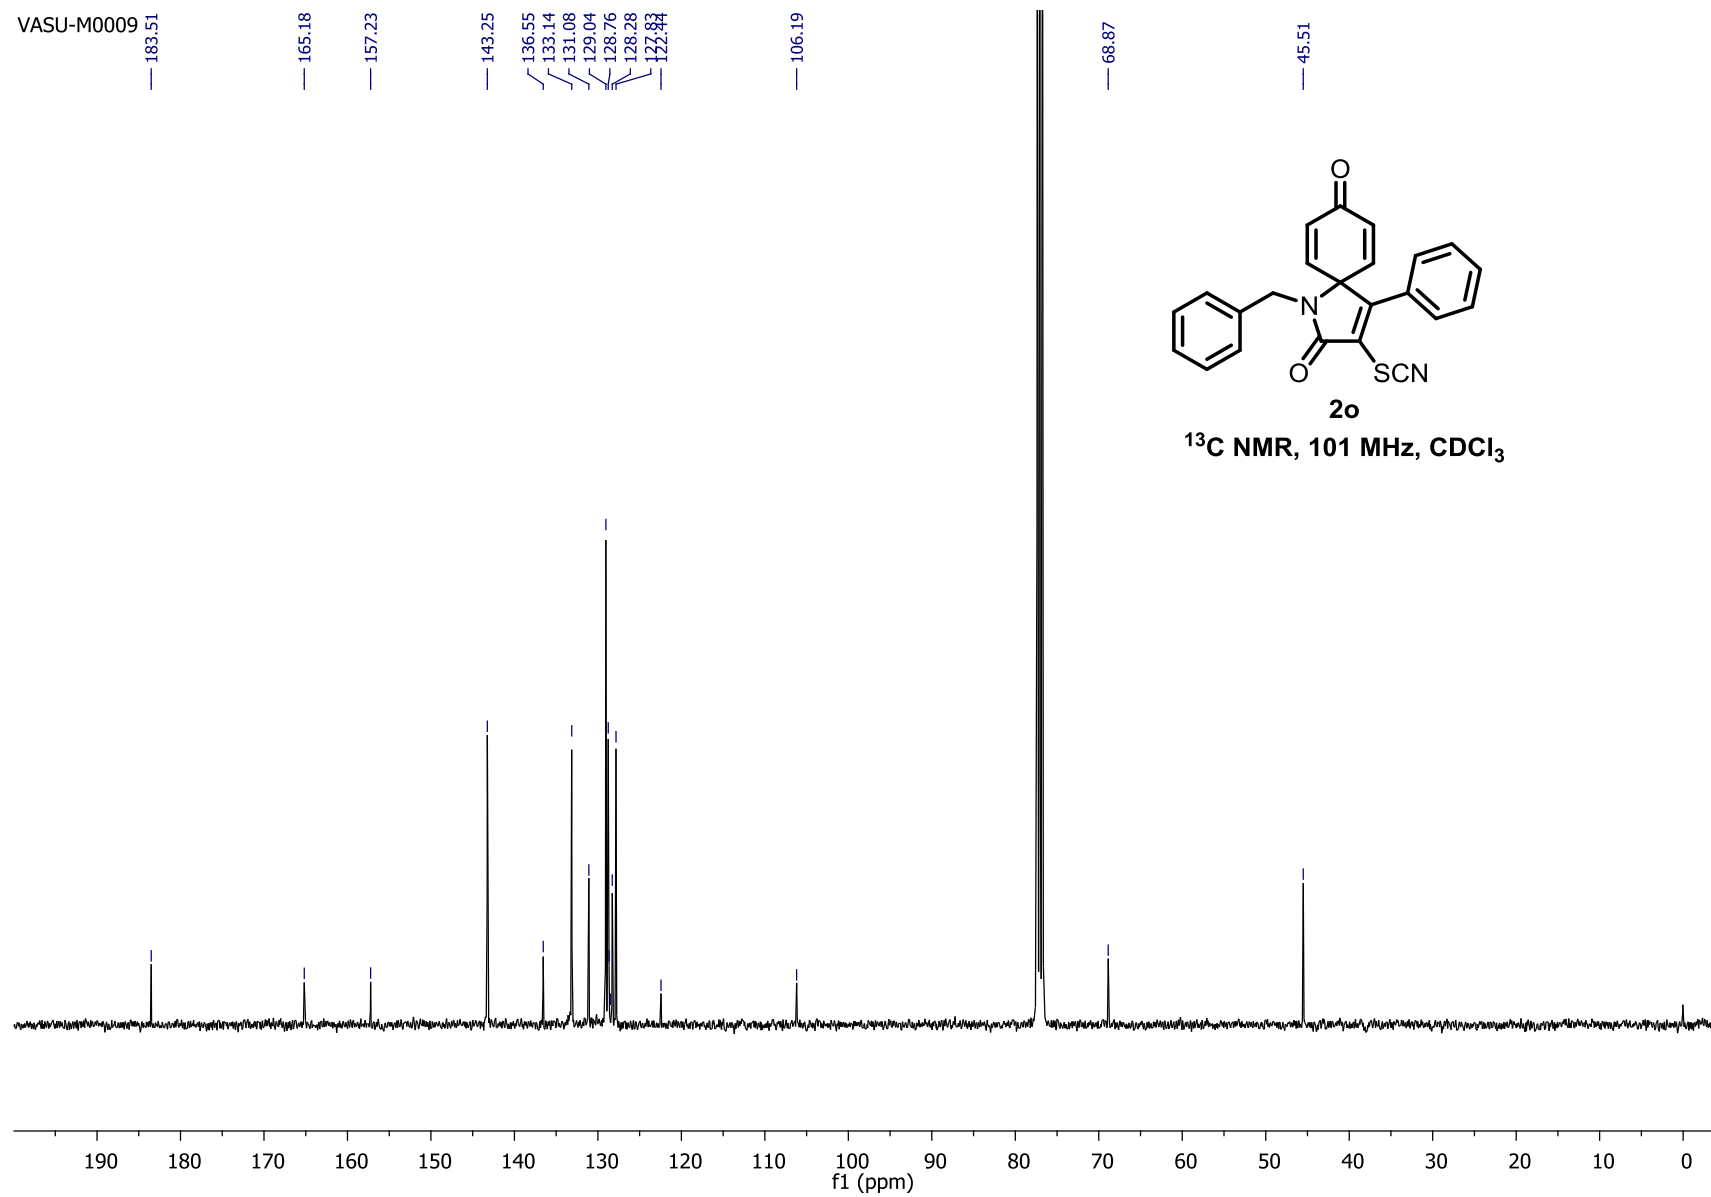



AJAY

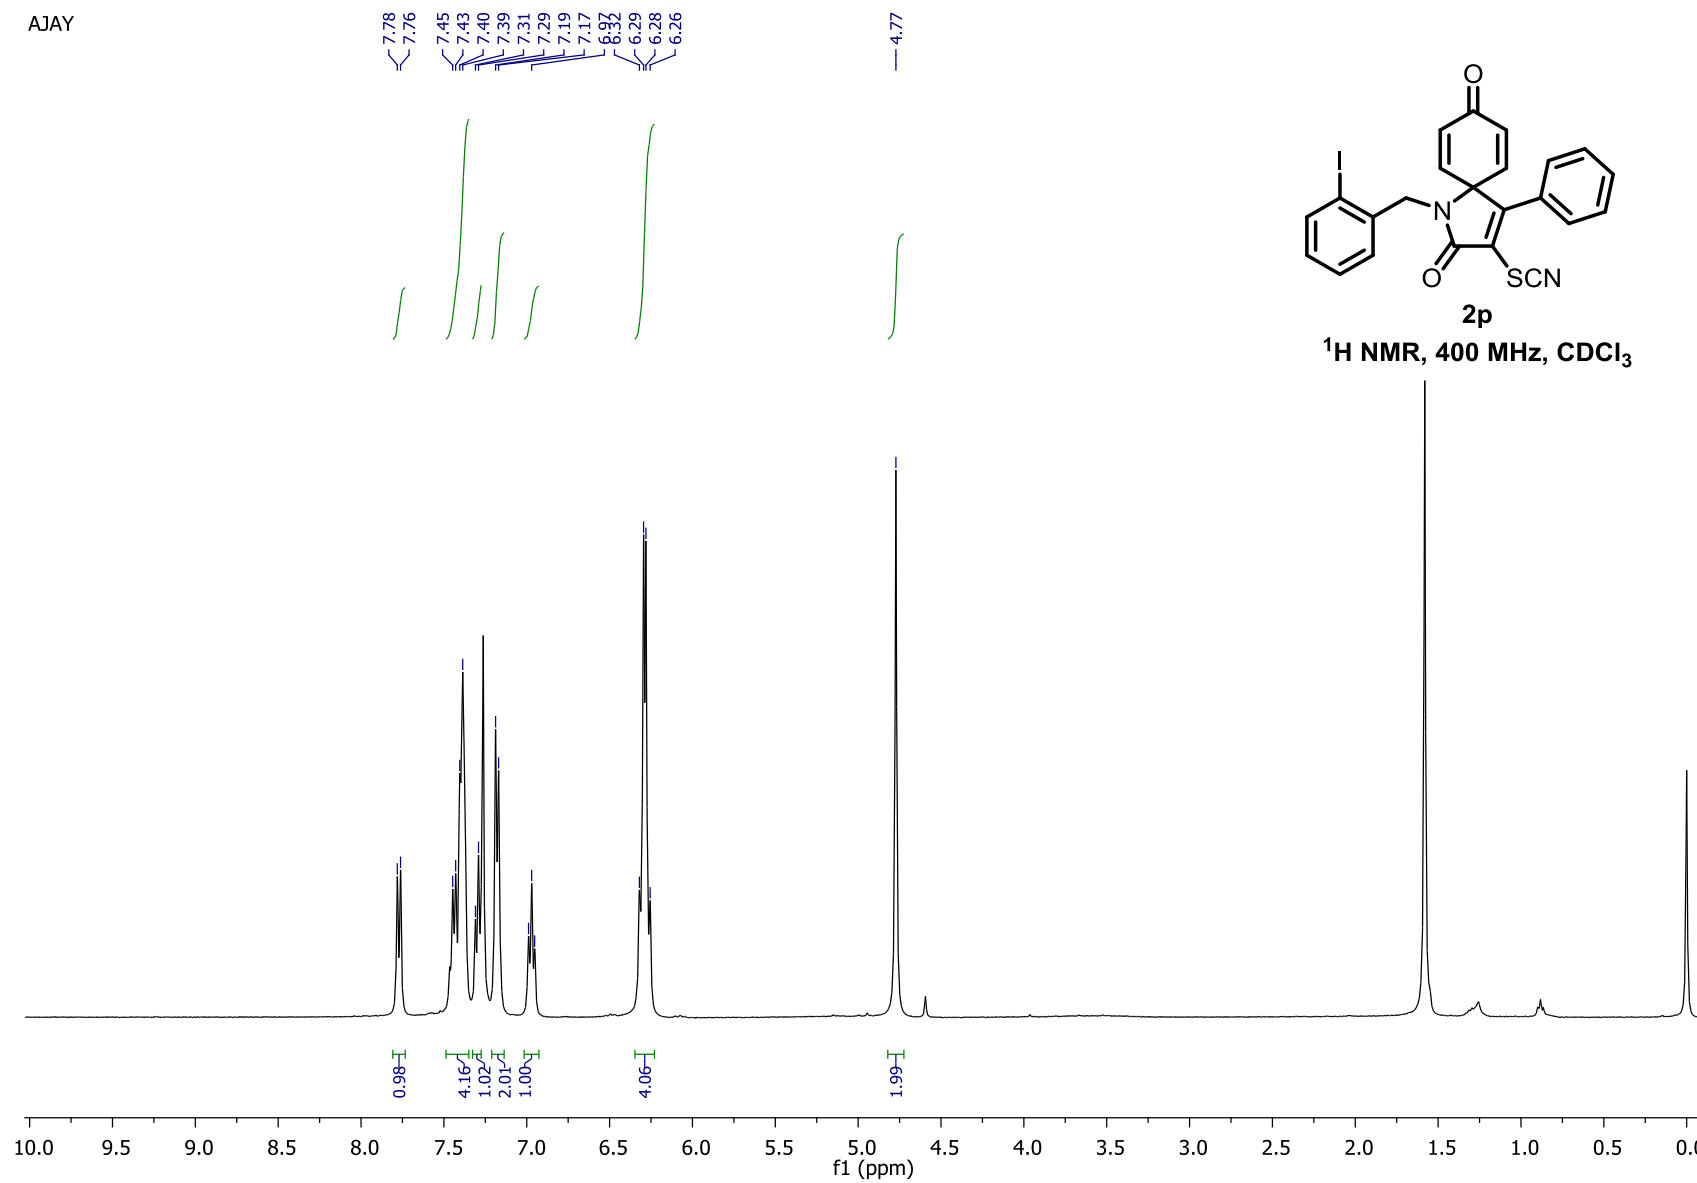

AJAY

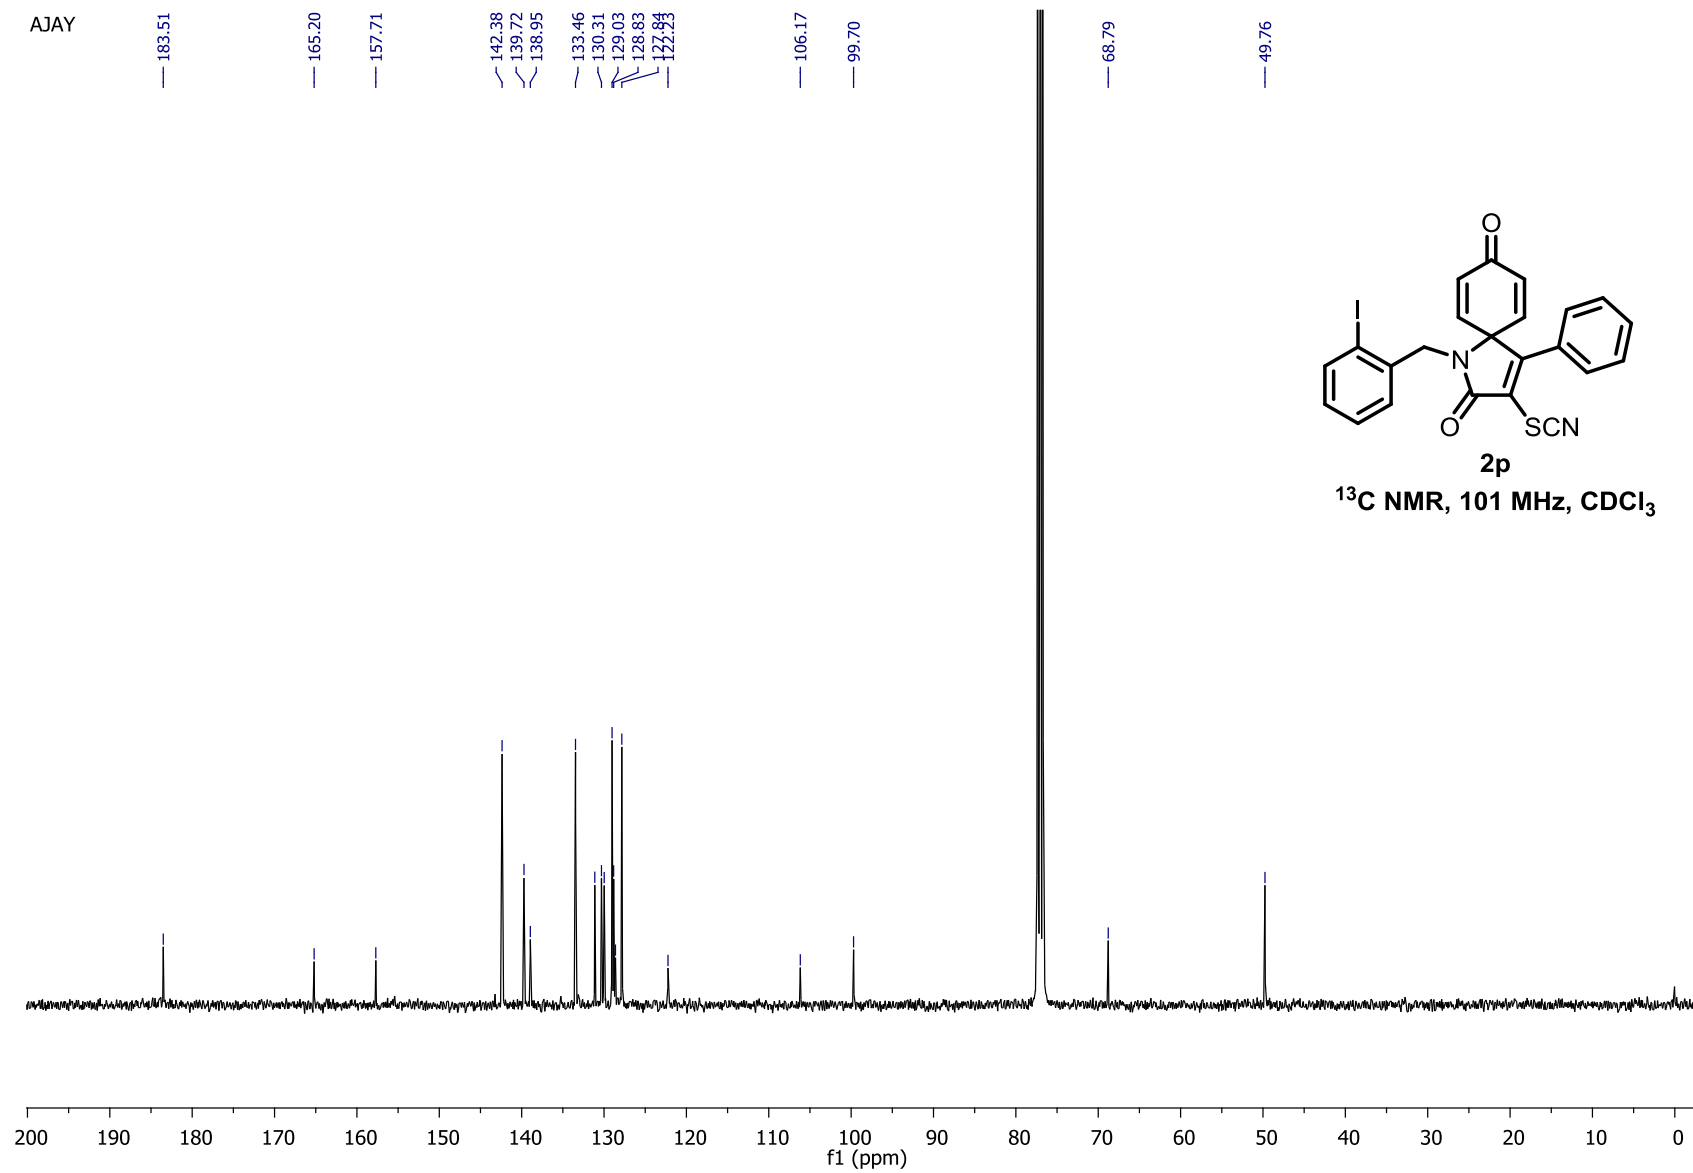

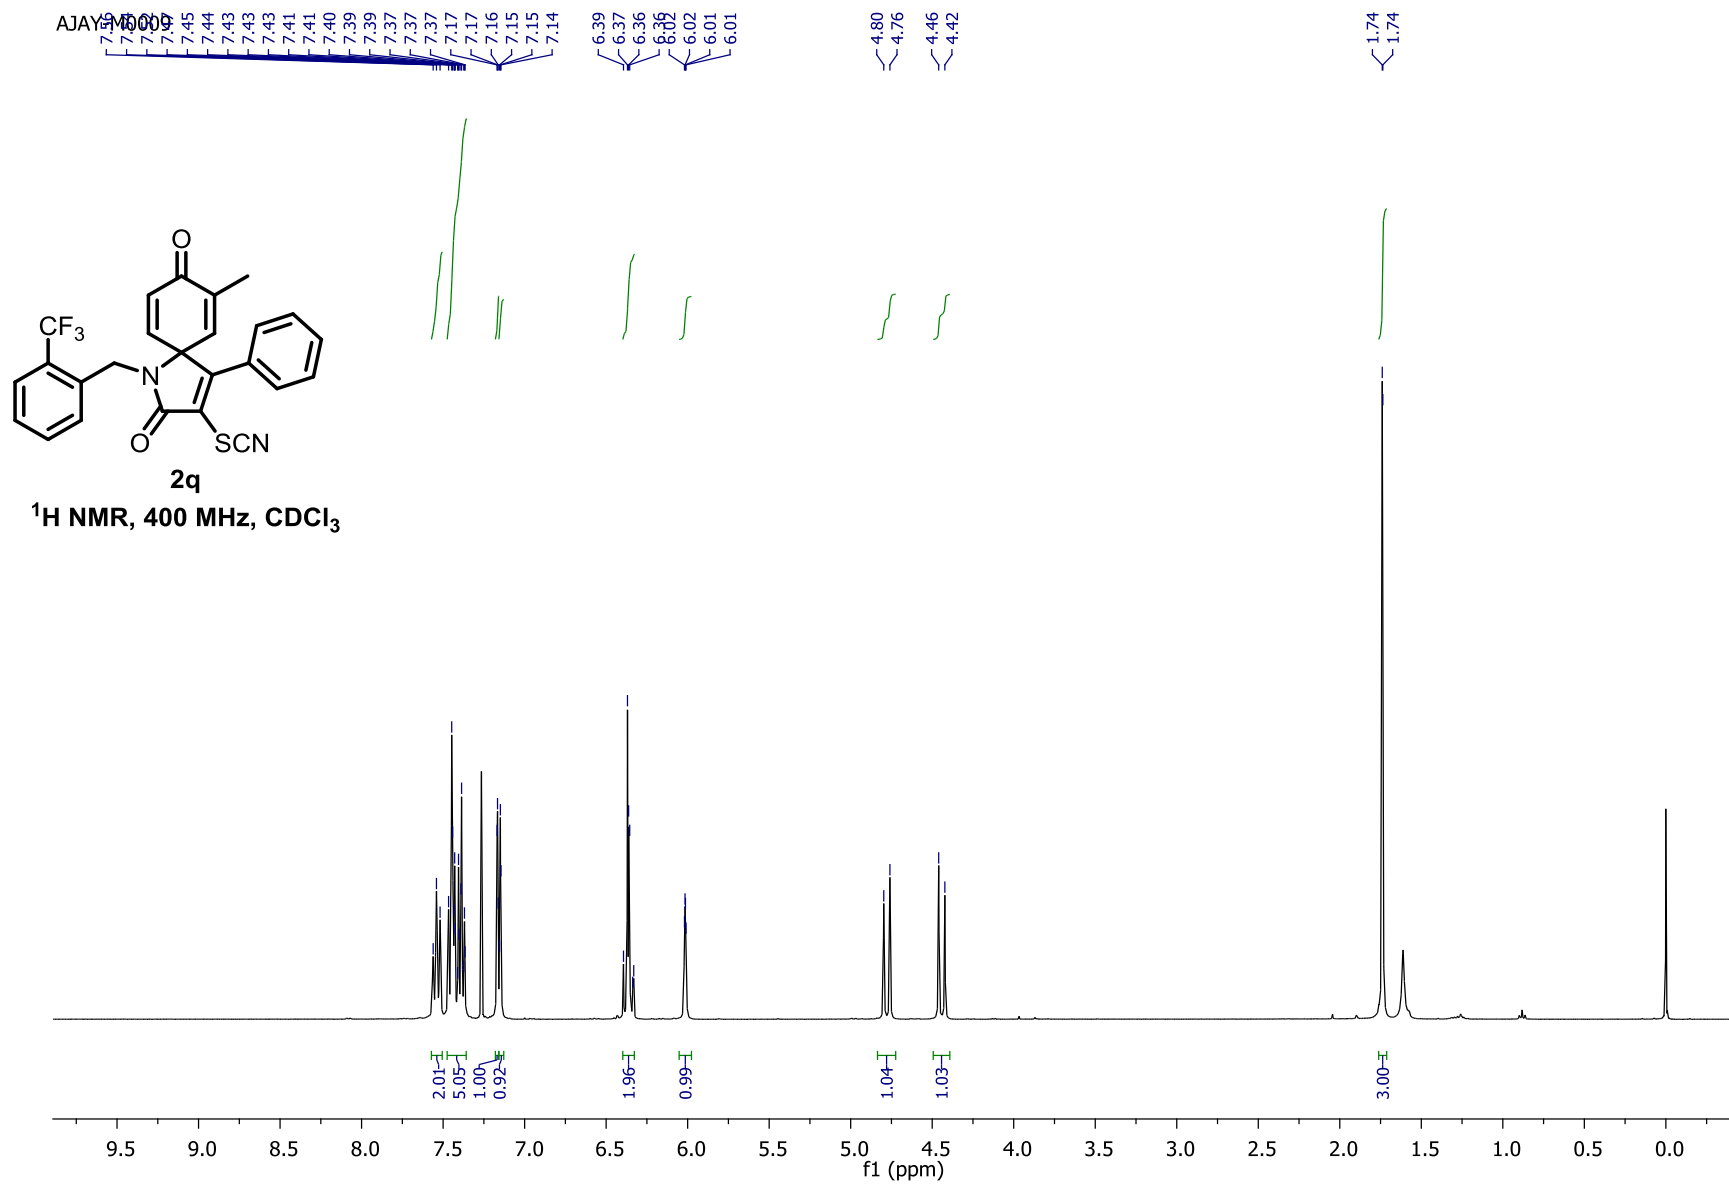

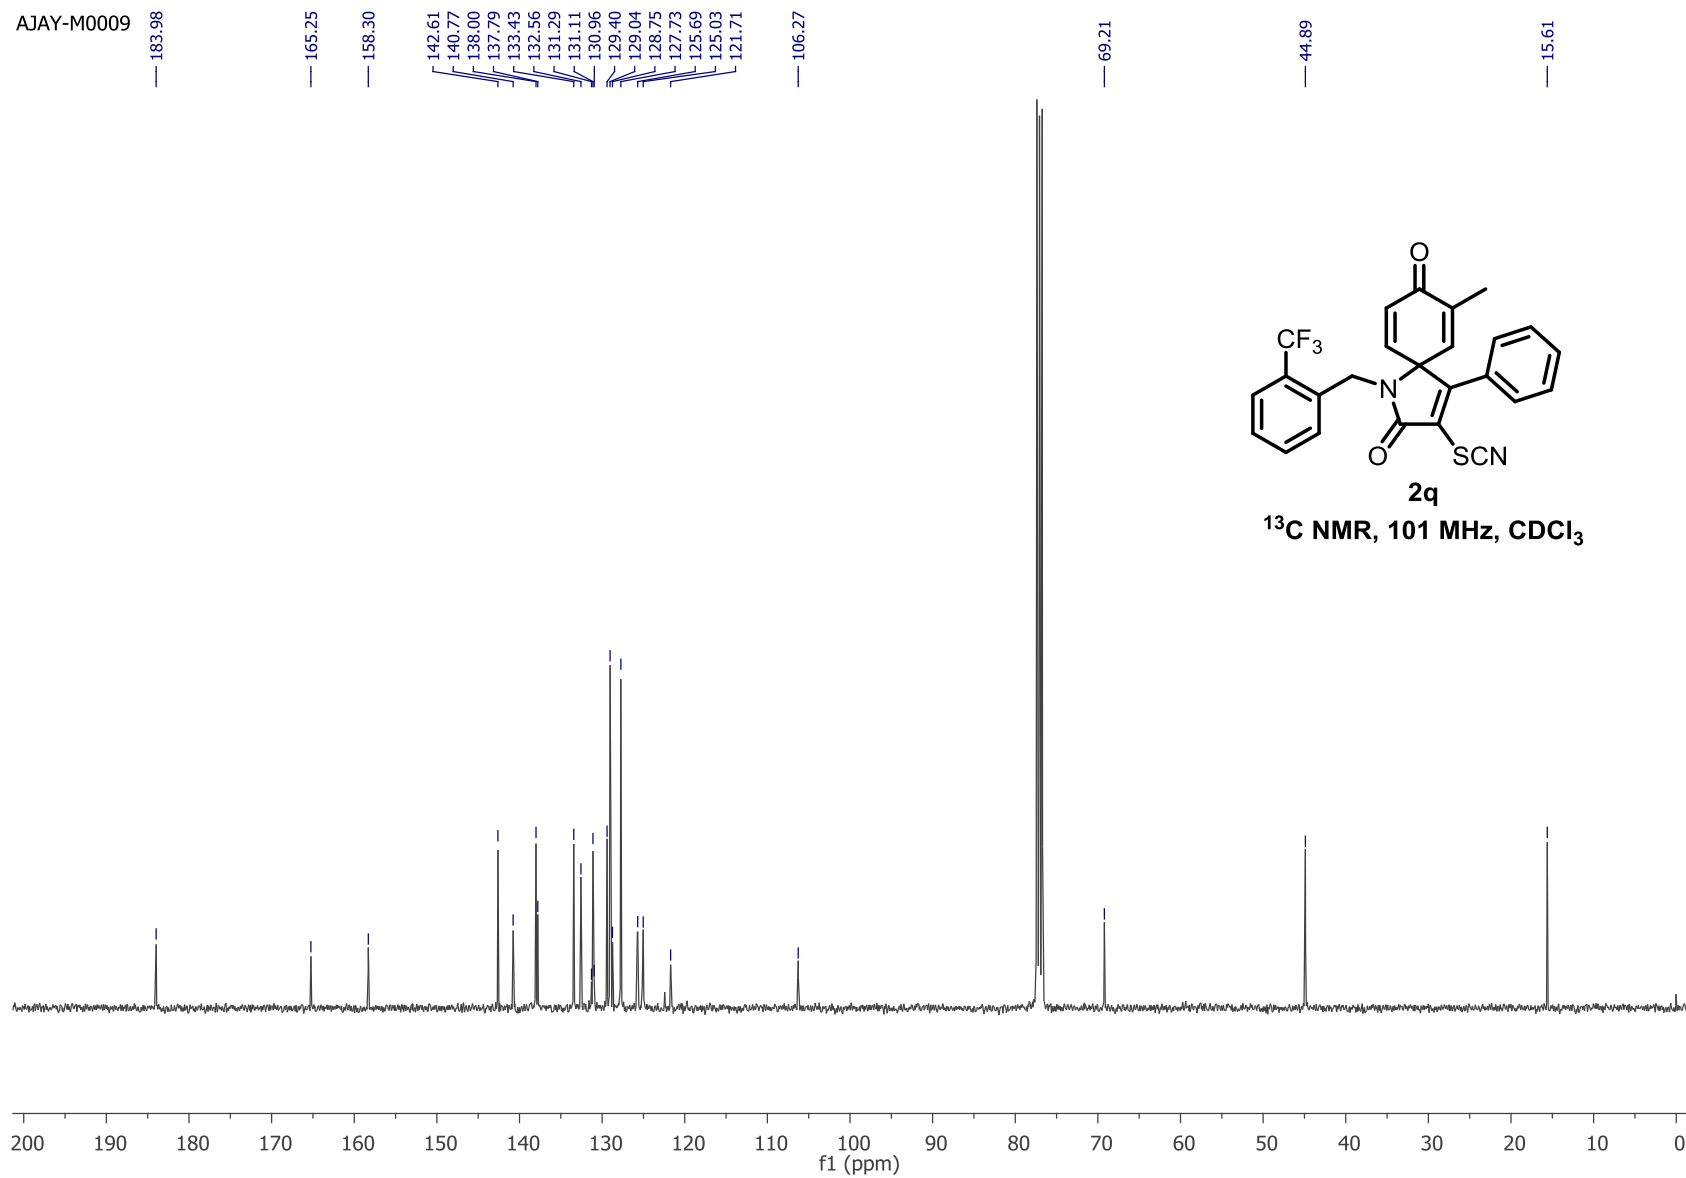

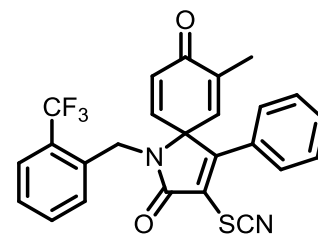

2q

<sup>19</sup>F NMR, 377 MHz, CDCl<sub>3</sub>

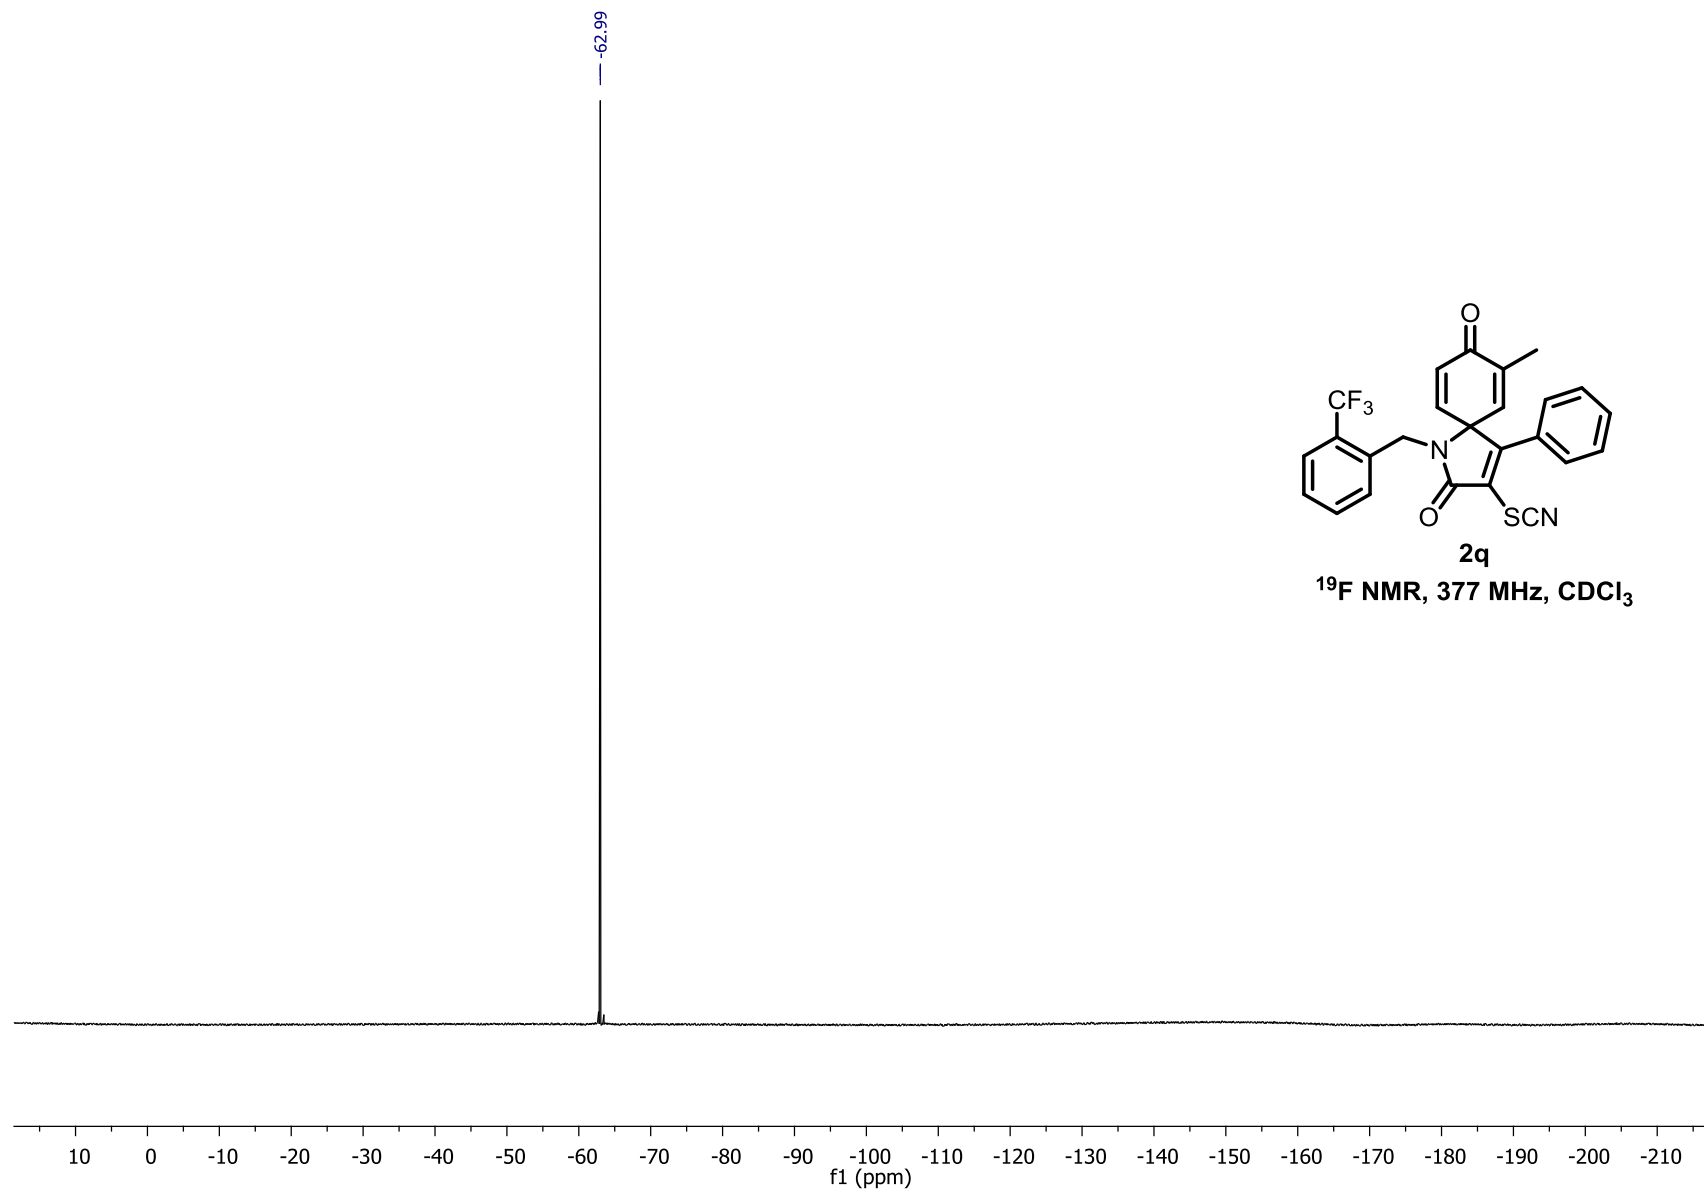

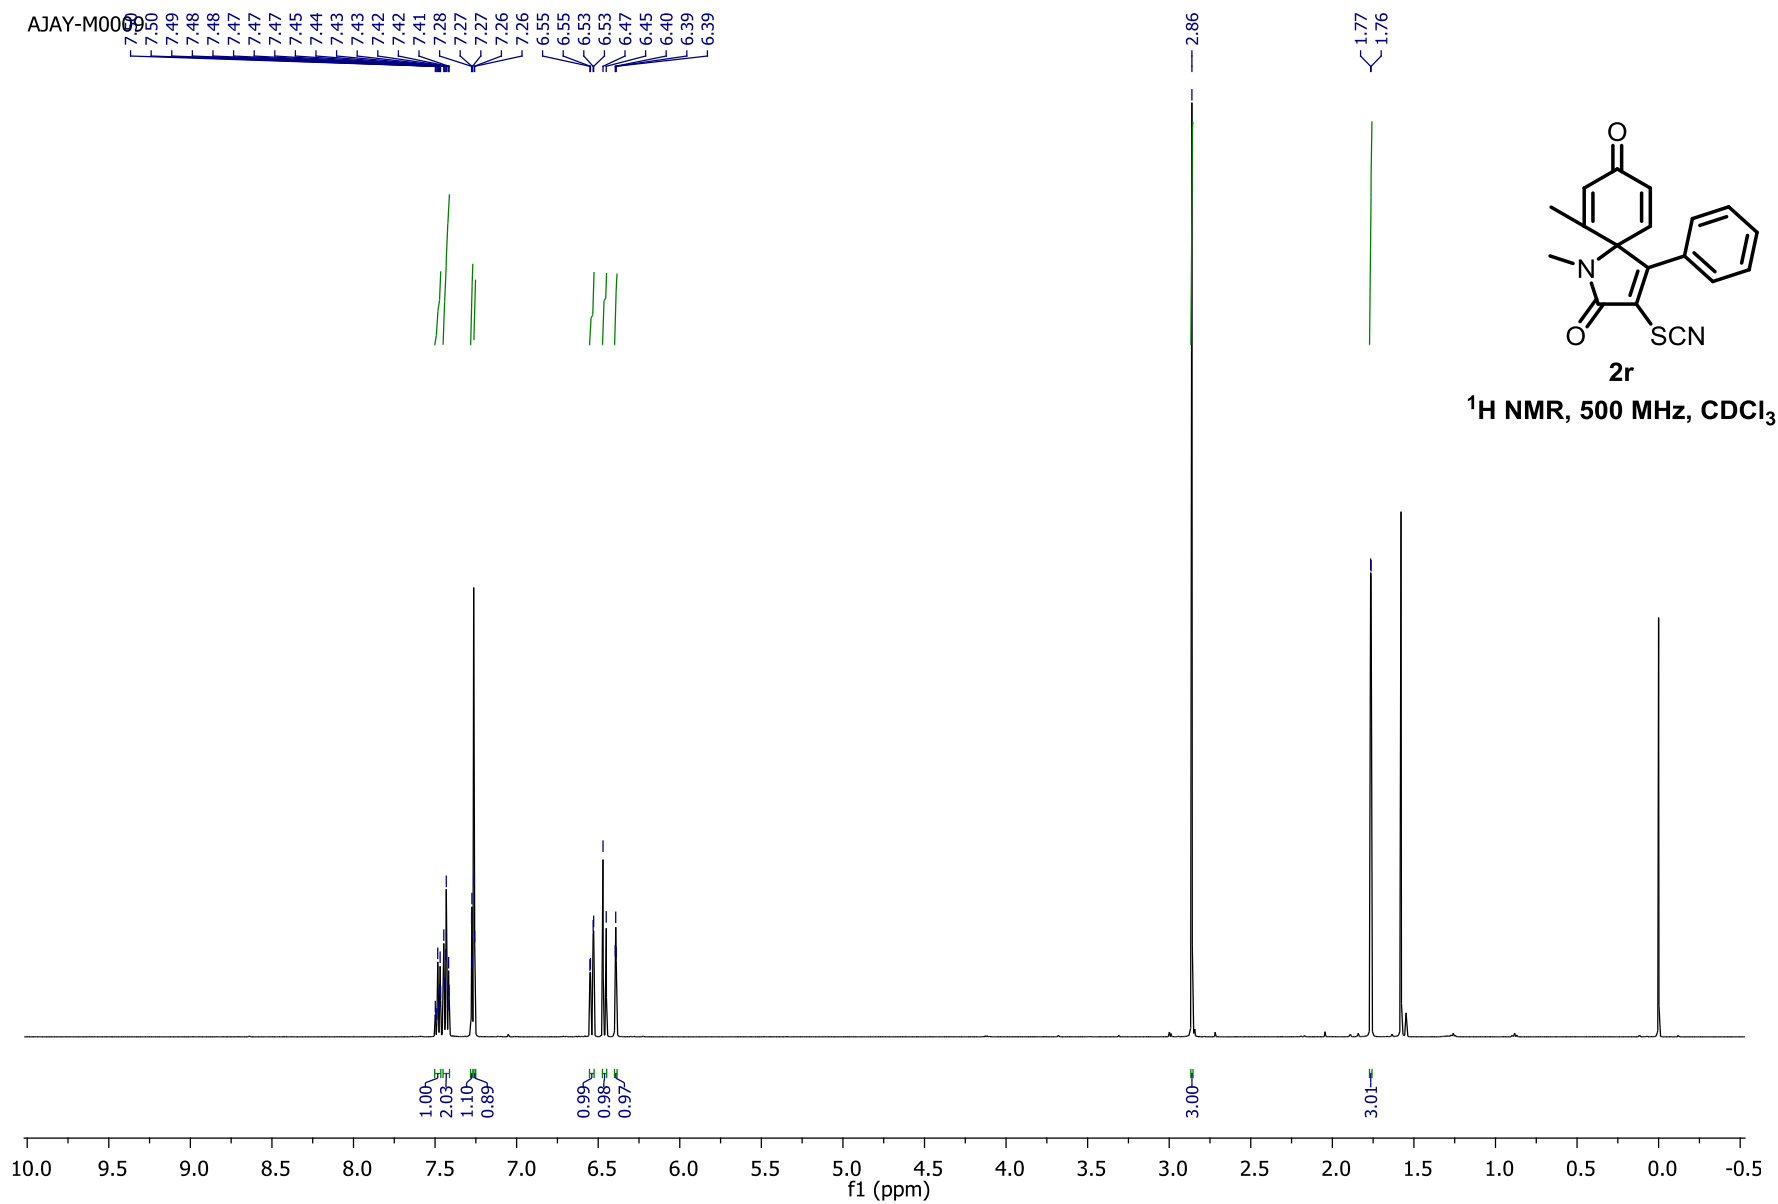

AJAY-M0009  
— 184.06

— 165.45

— 157.36

— 151.57

— 143.24

133.51

132.63

131.40

129.32

128.75

127.58

122.43

— 106.30

— 70.53

— 26.17

— 17.75

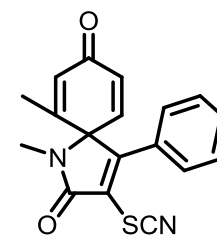

2r

<sup>13</sup>C NMR, 101 MHz, CDCl<sub>3</sub>

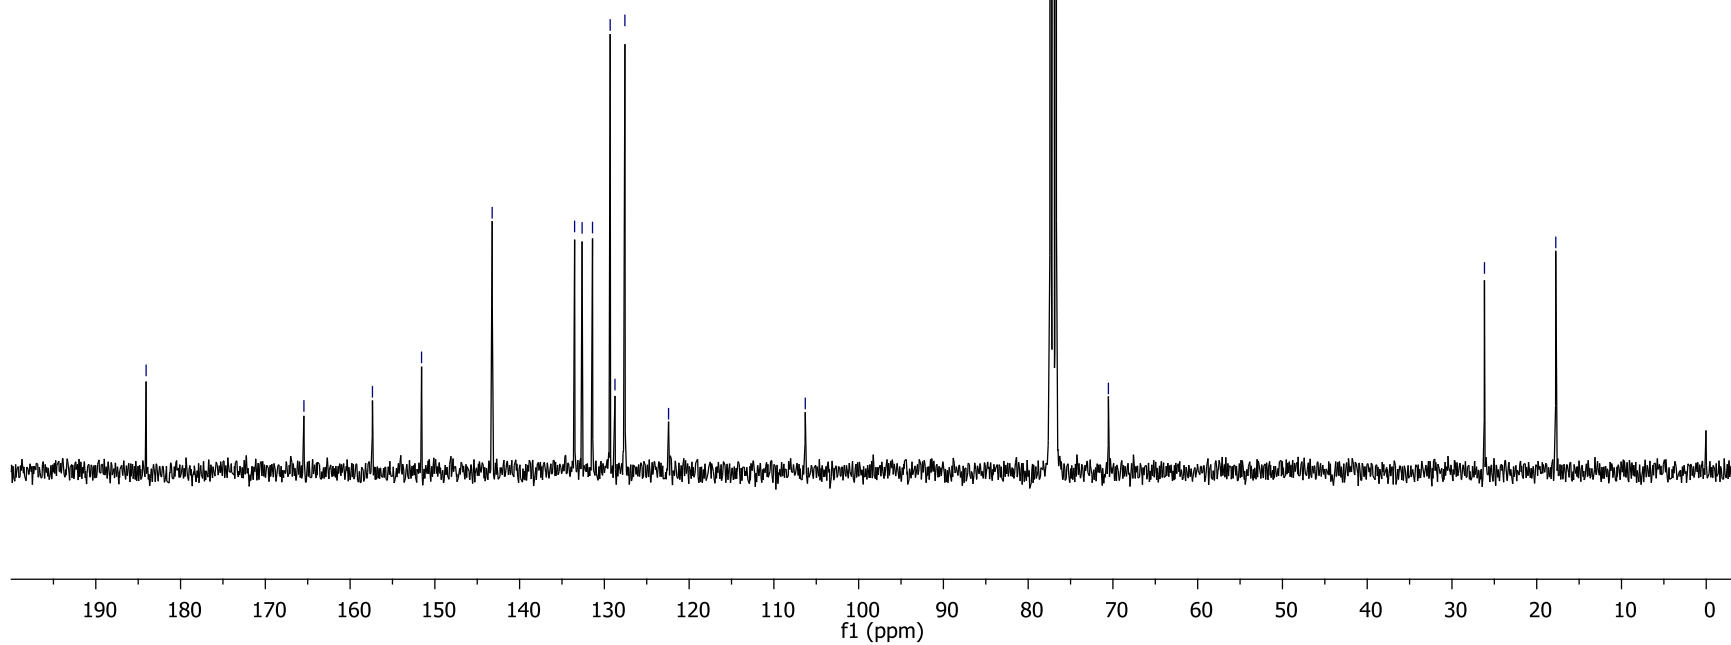

S47

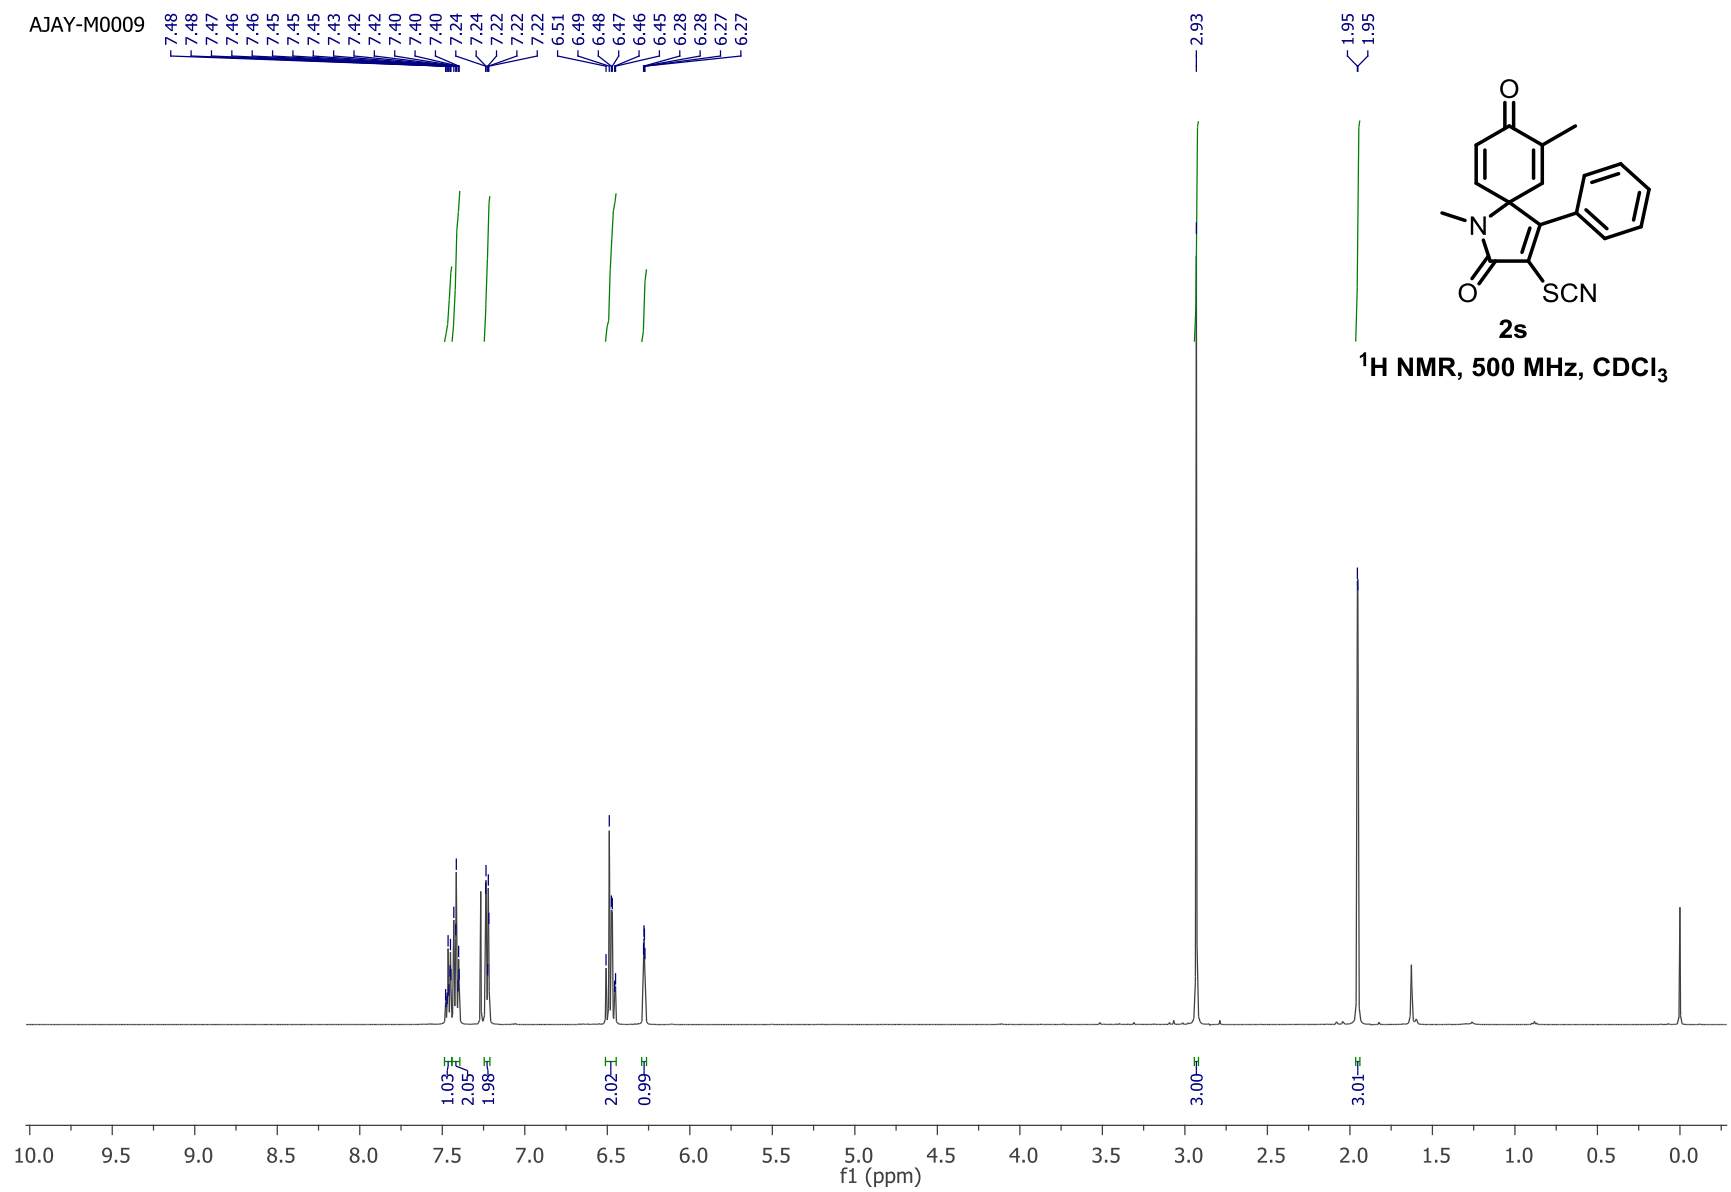



AJAY-M0009

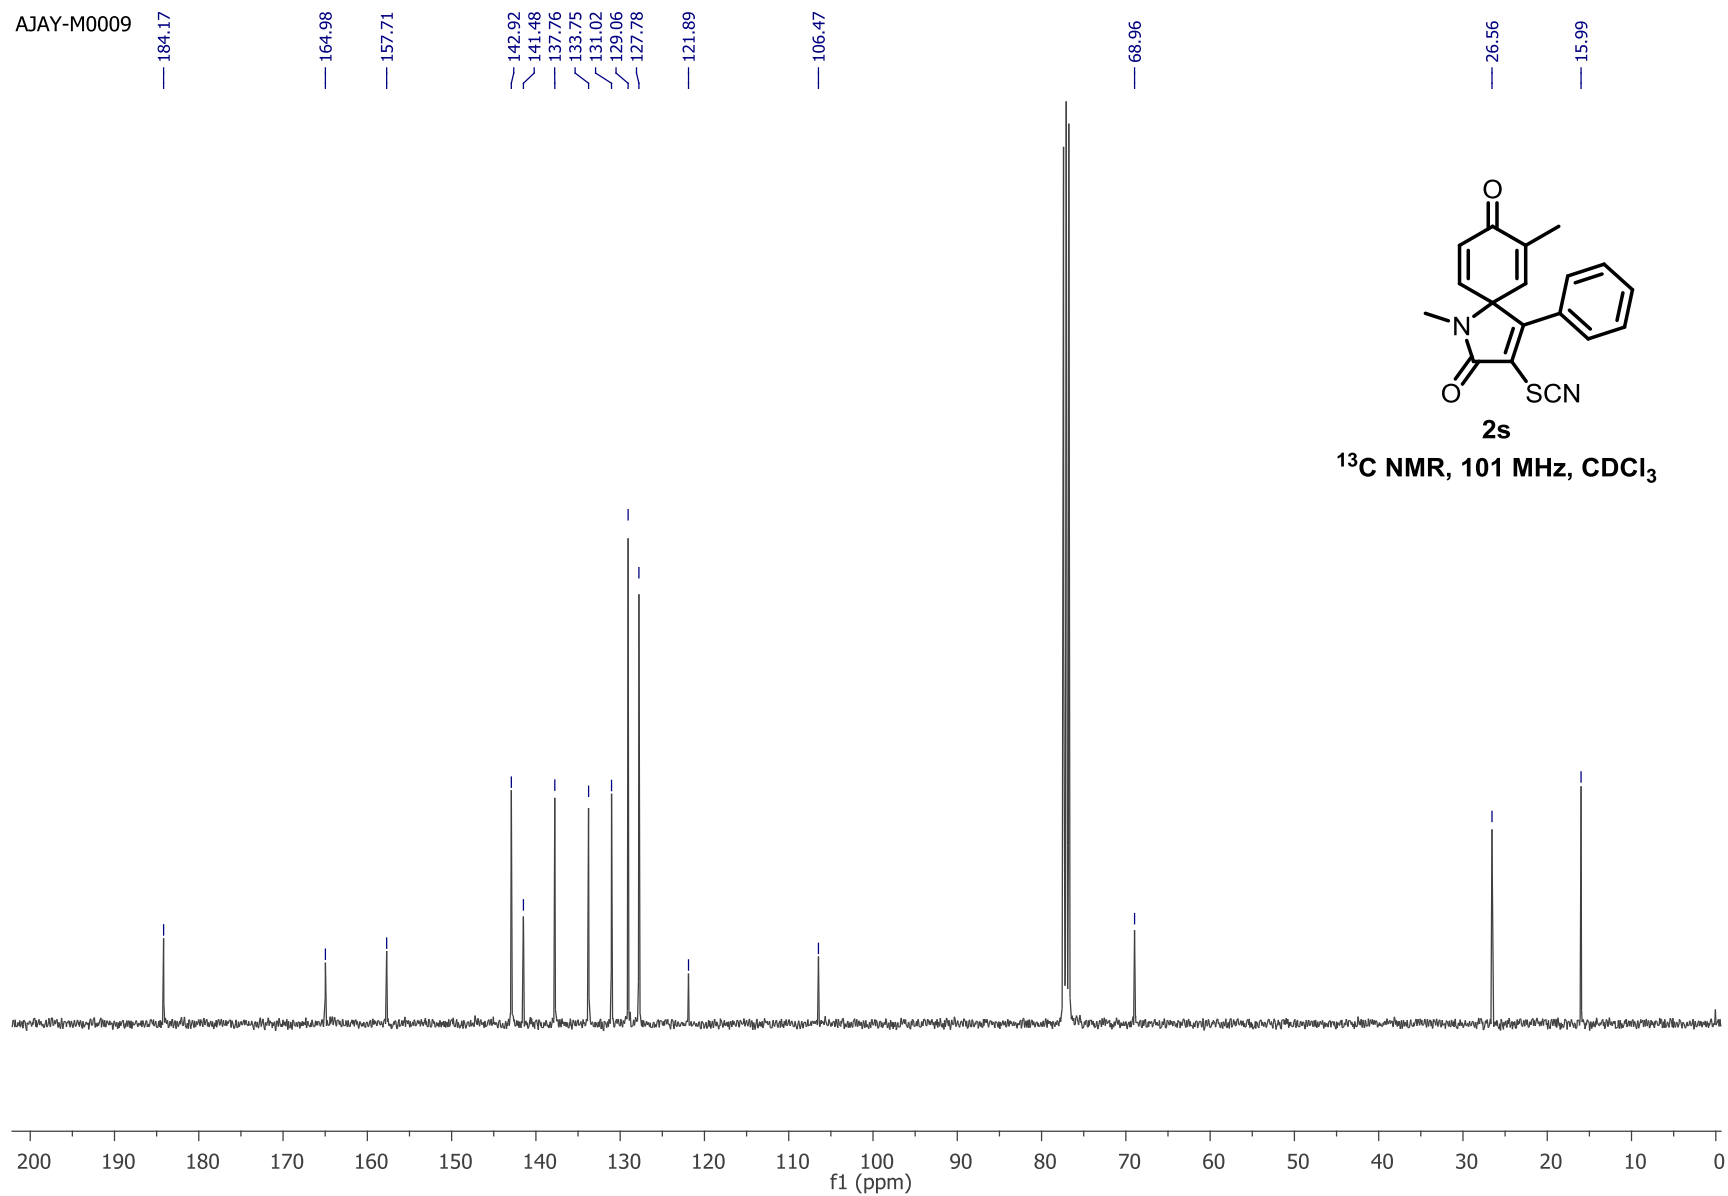

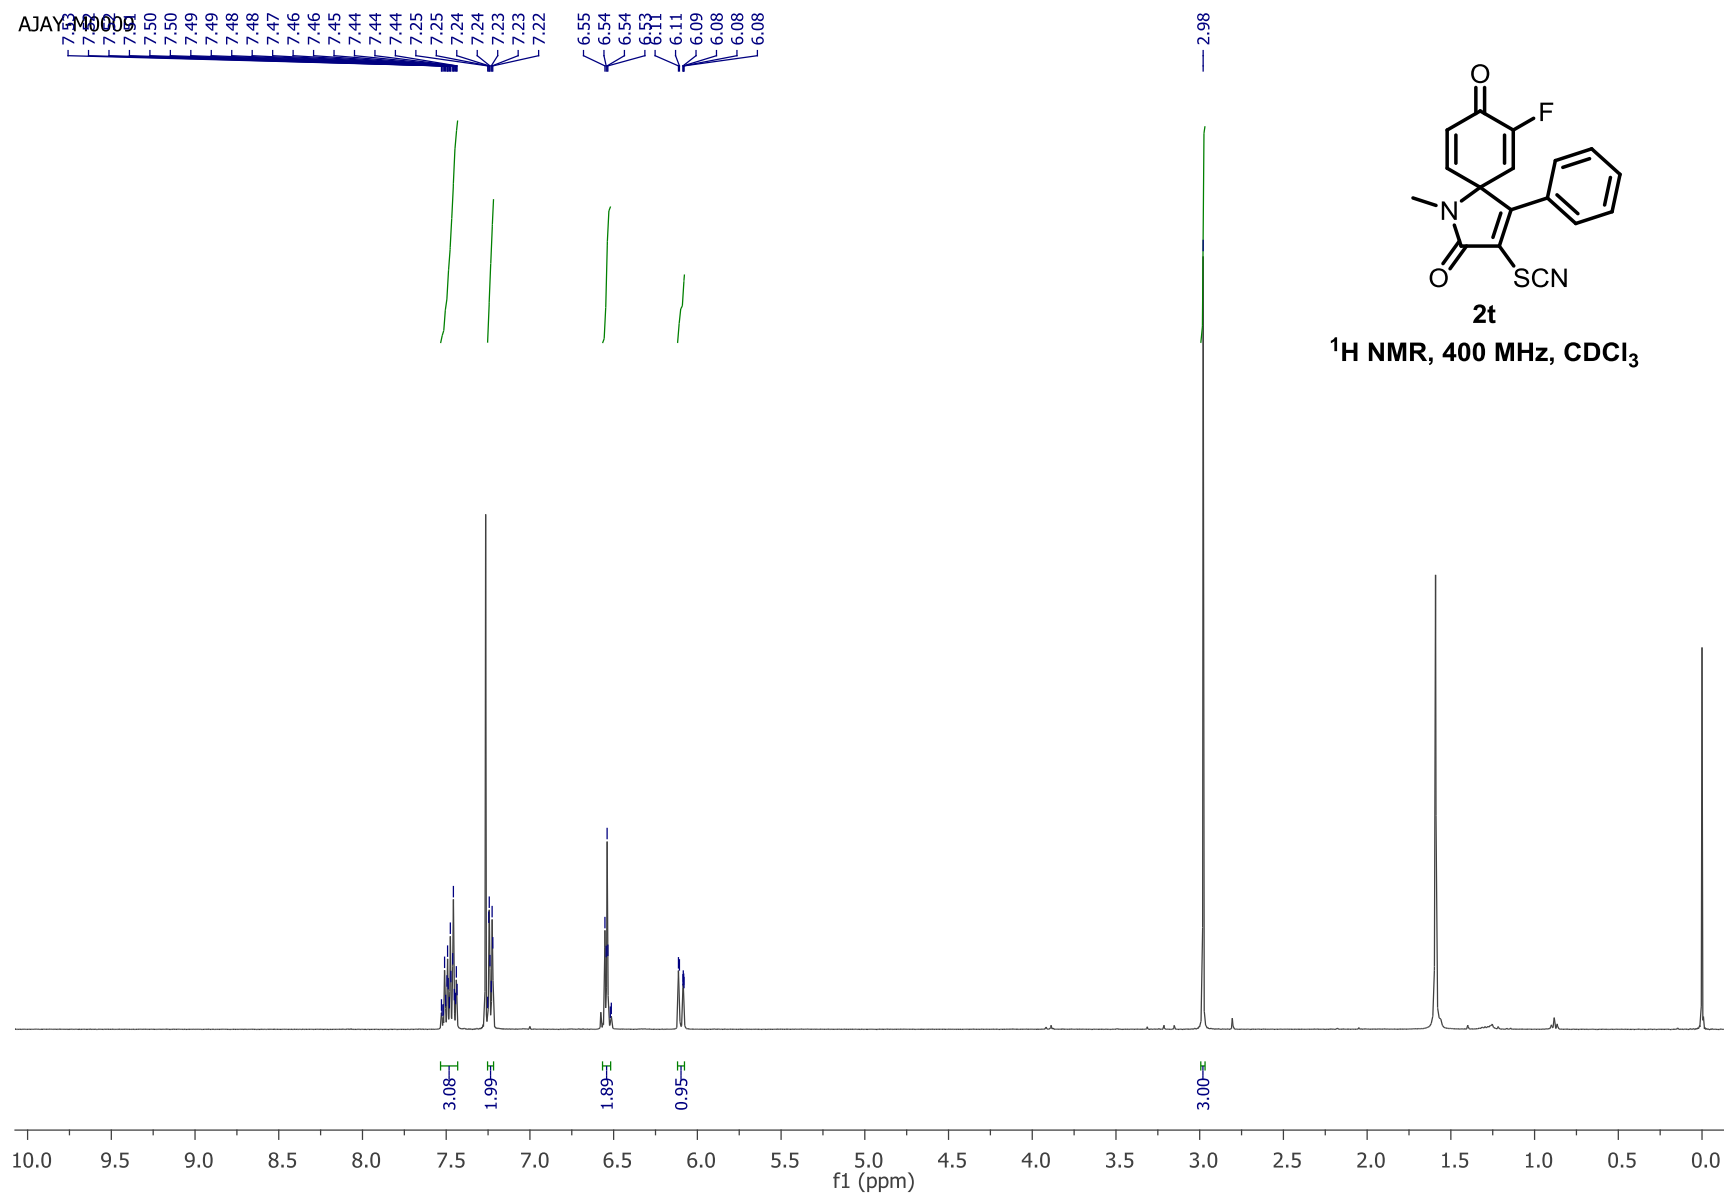

AJAY-M0009

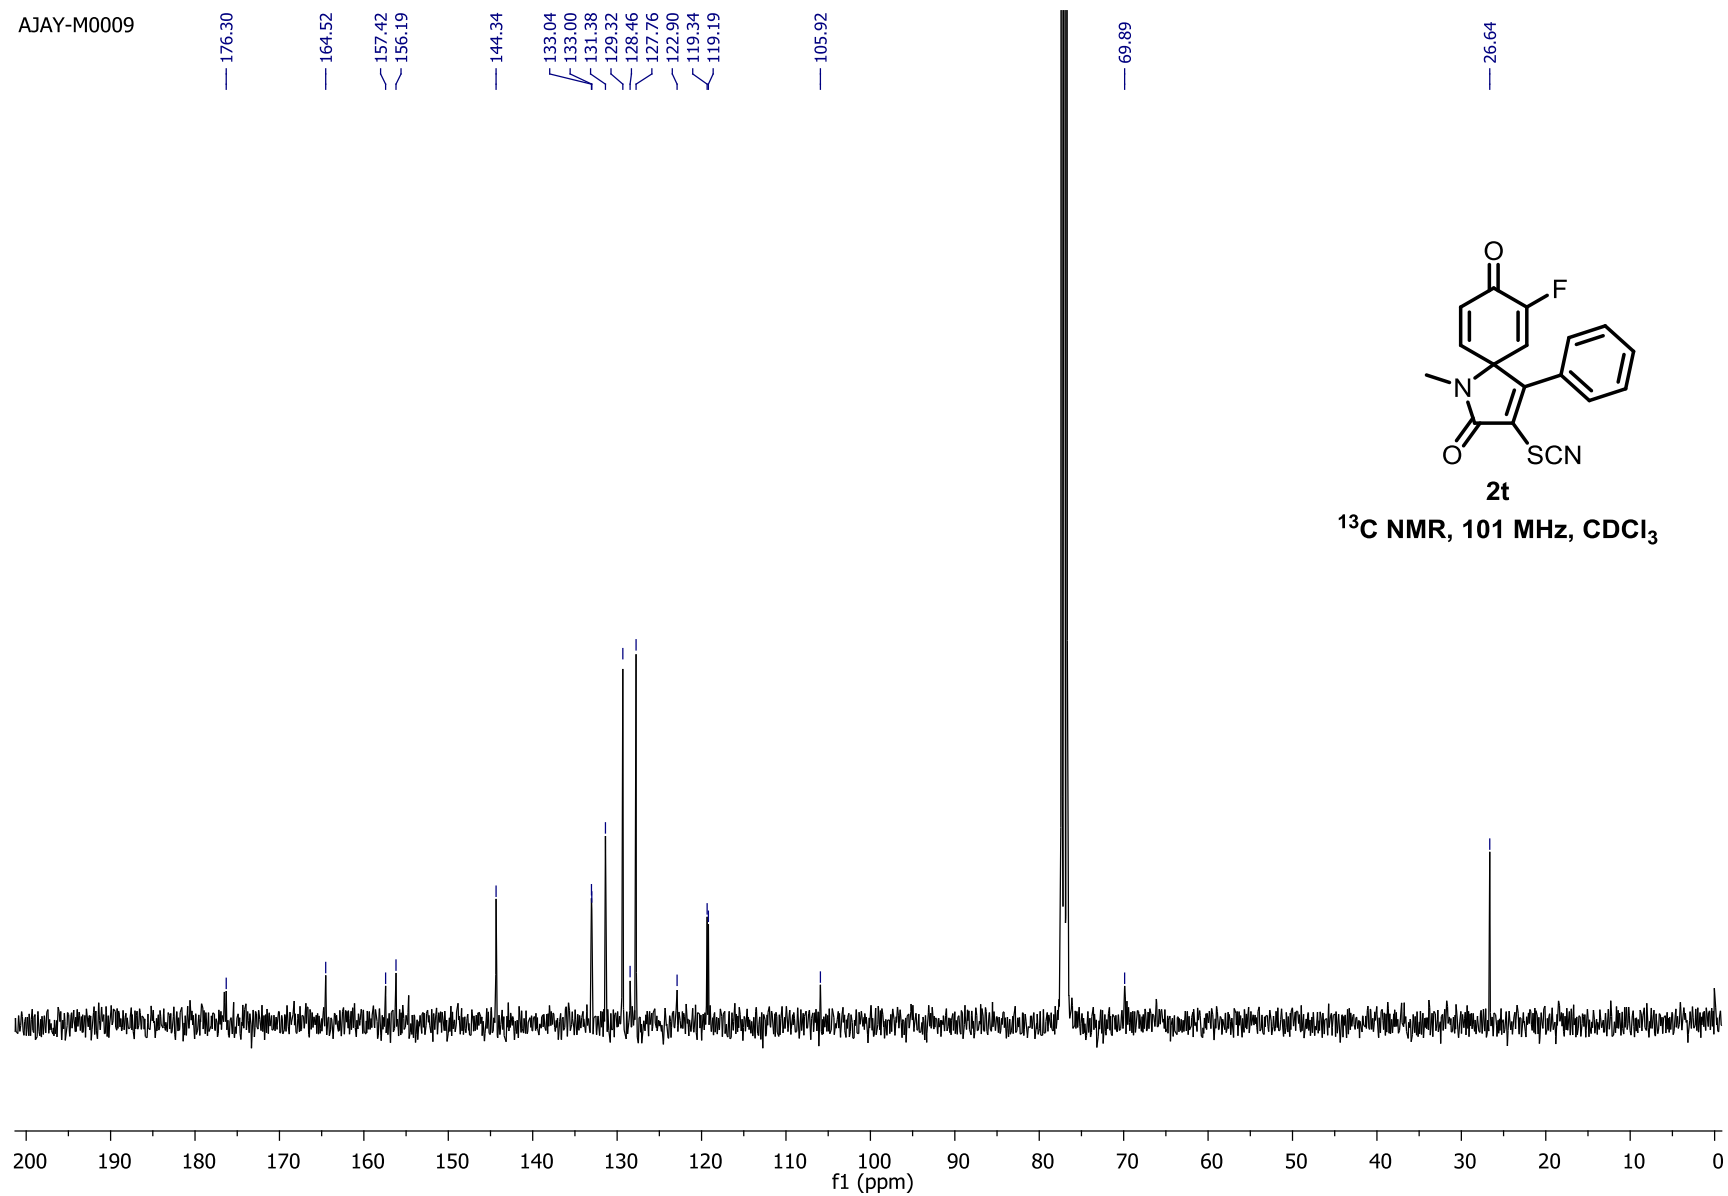

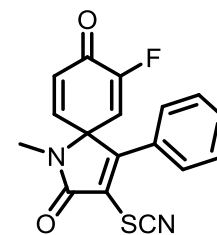

2t

<sup>19</sup>F NMR, 377 MHz, CDCl<sub>3</sub>

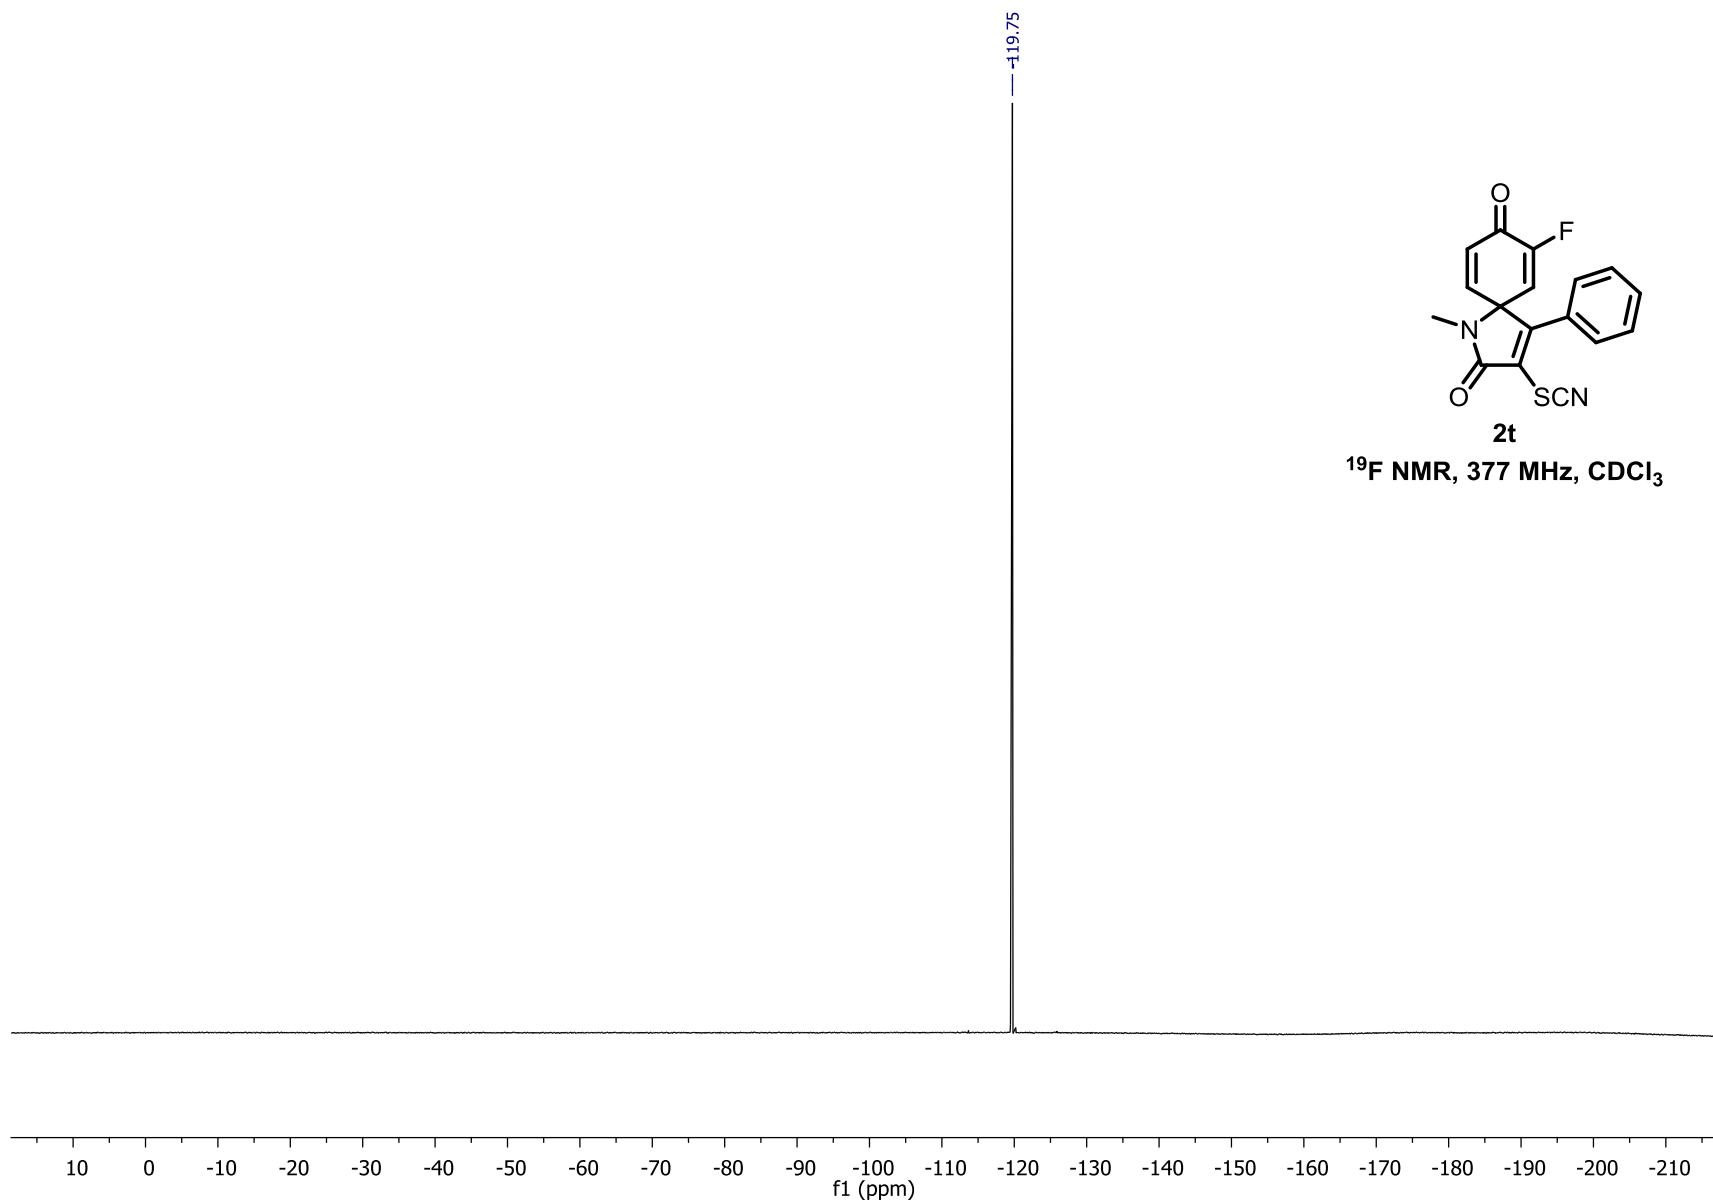

AJAY-M0009

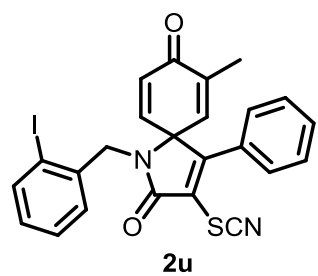

$^1\text{H}$  NMR, 500 MHz,  $\text{CDCl}_3$

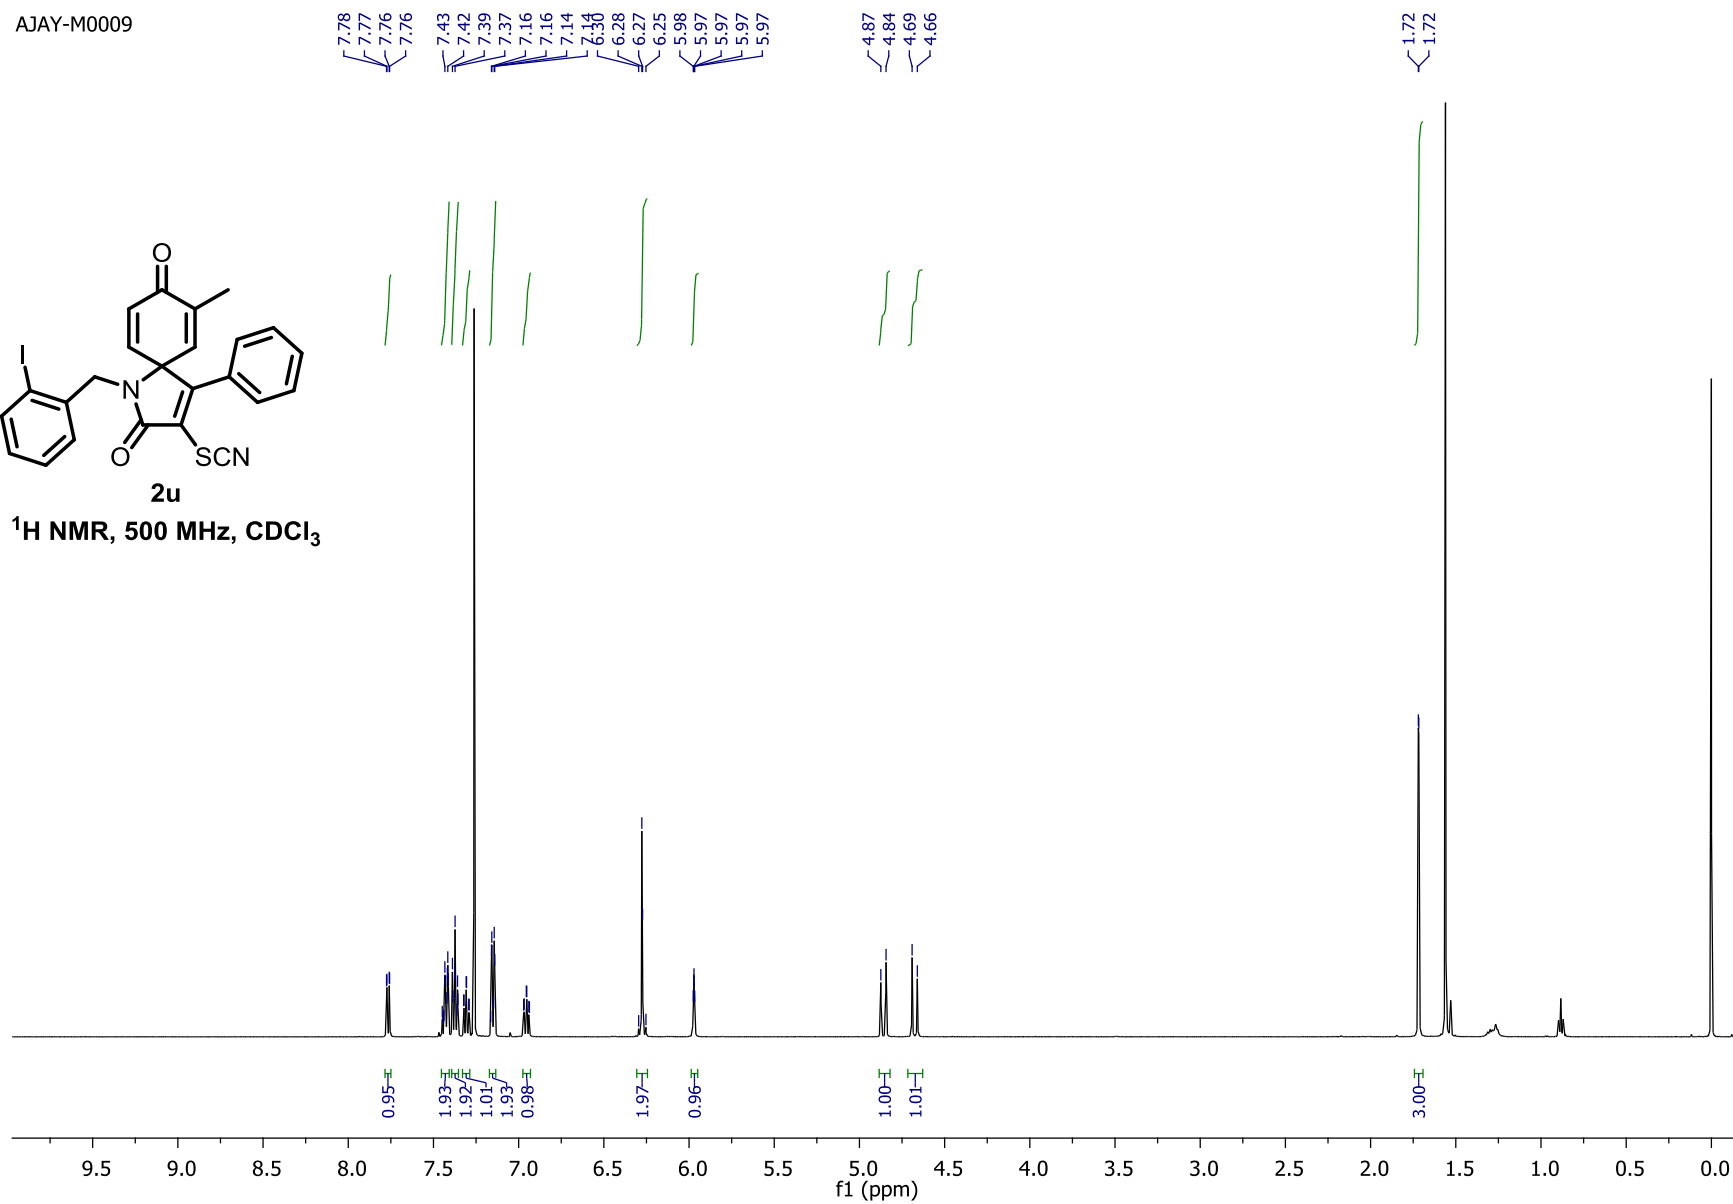

AJAY-M0009

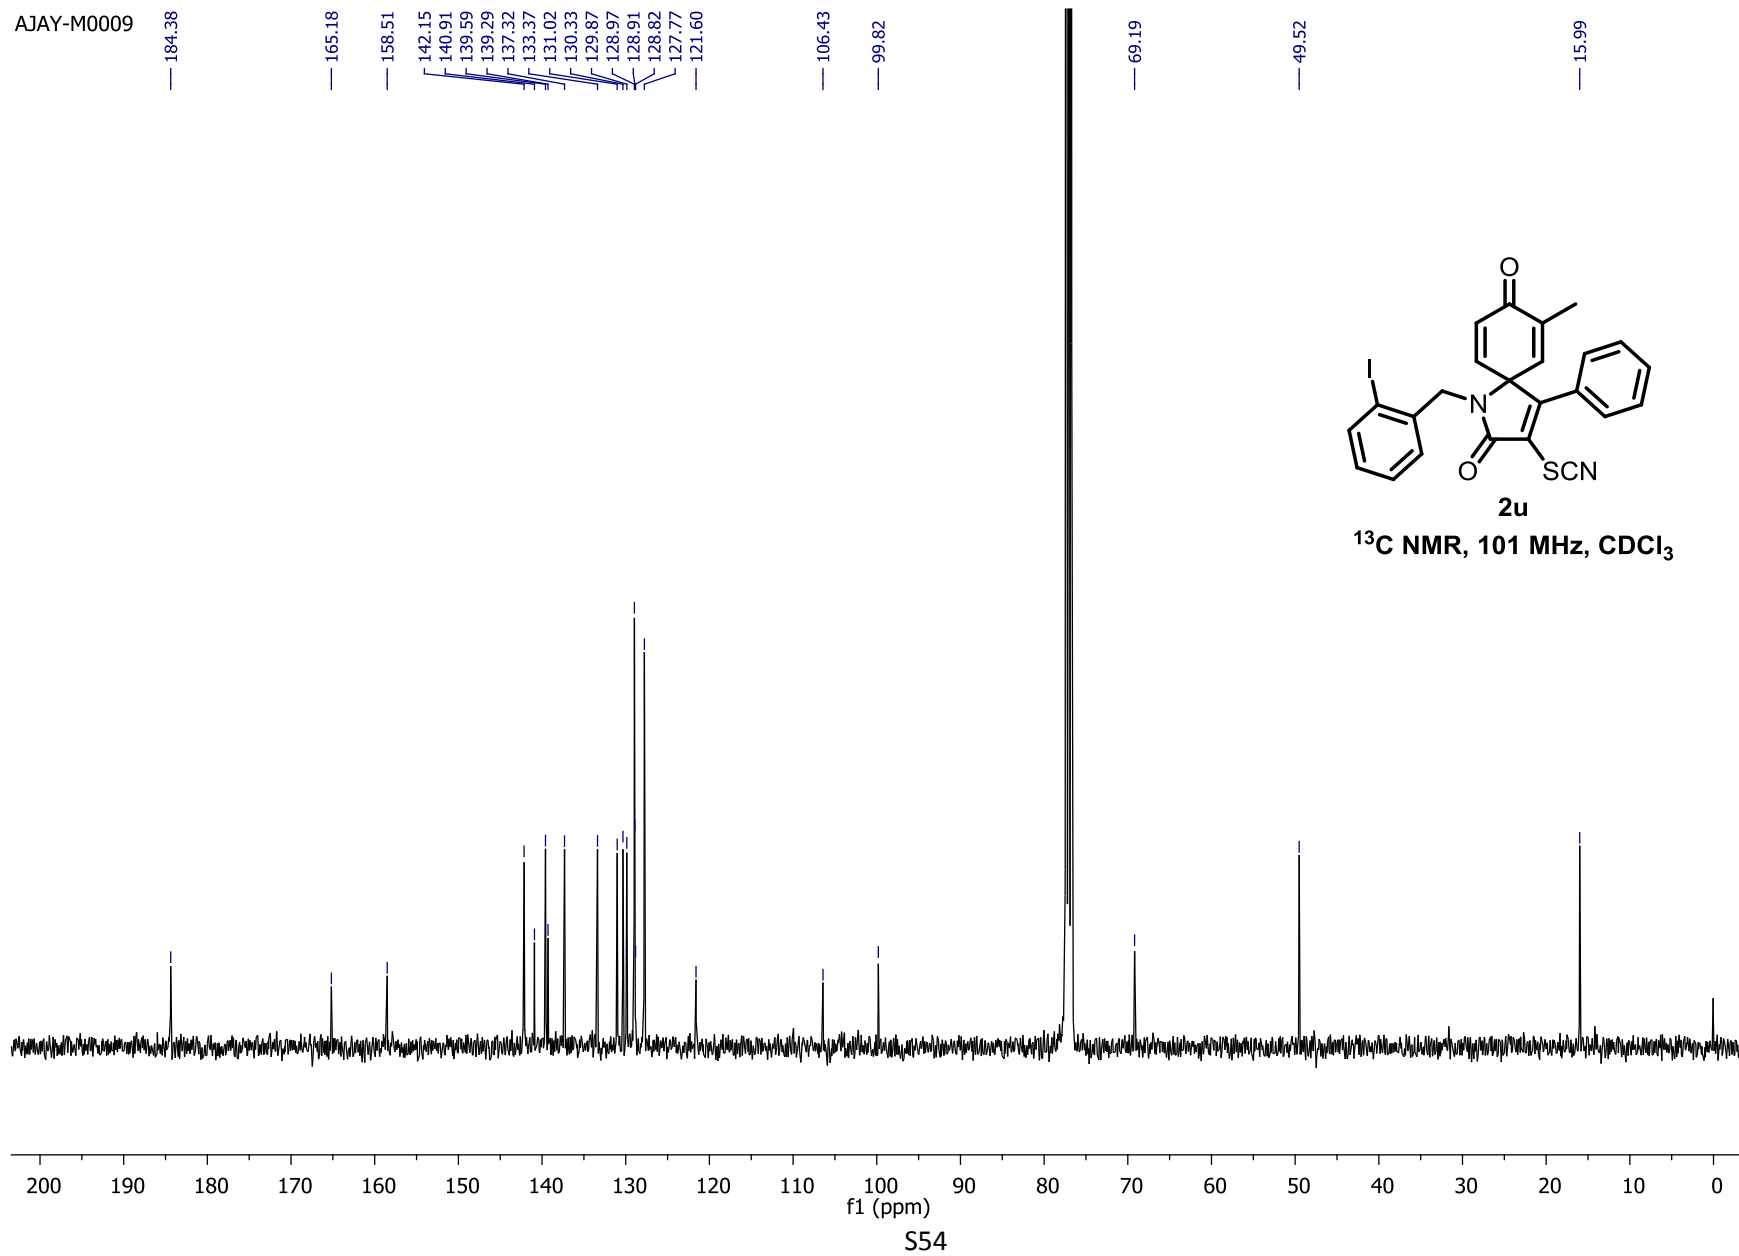

AJAY-M0009

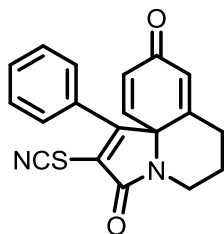

4

$^1\text{H}$ , 500 MHz,  $\text{CDCl}_3$

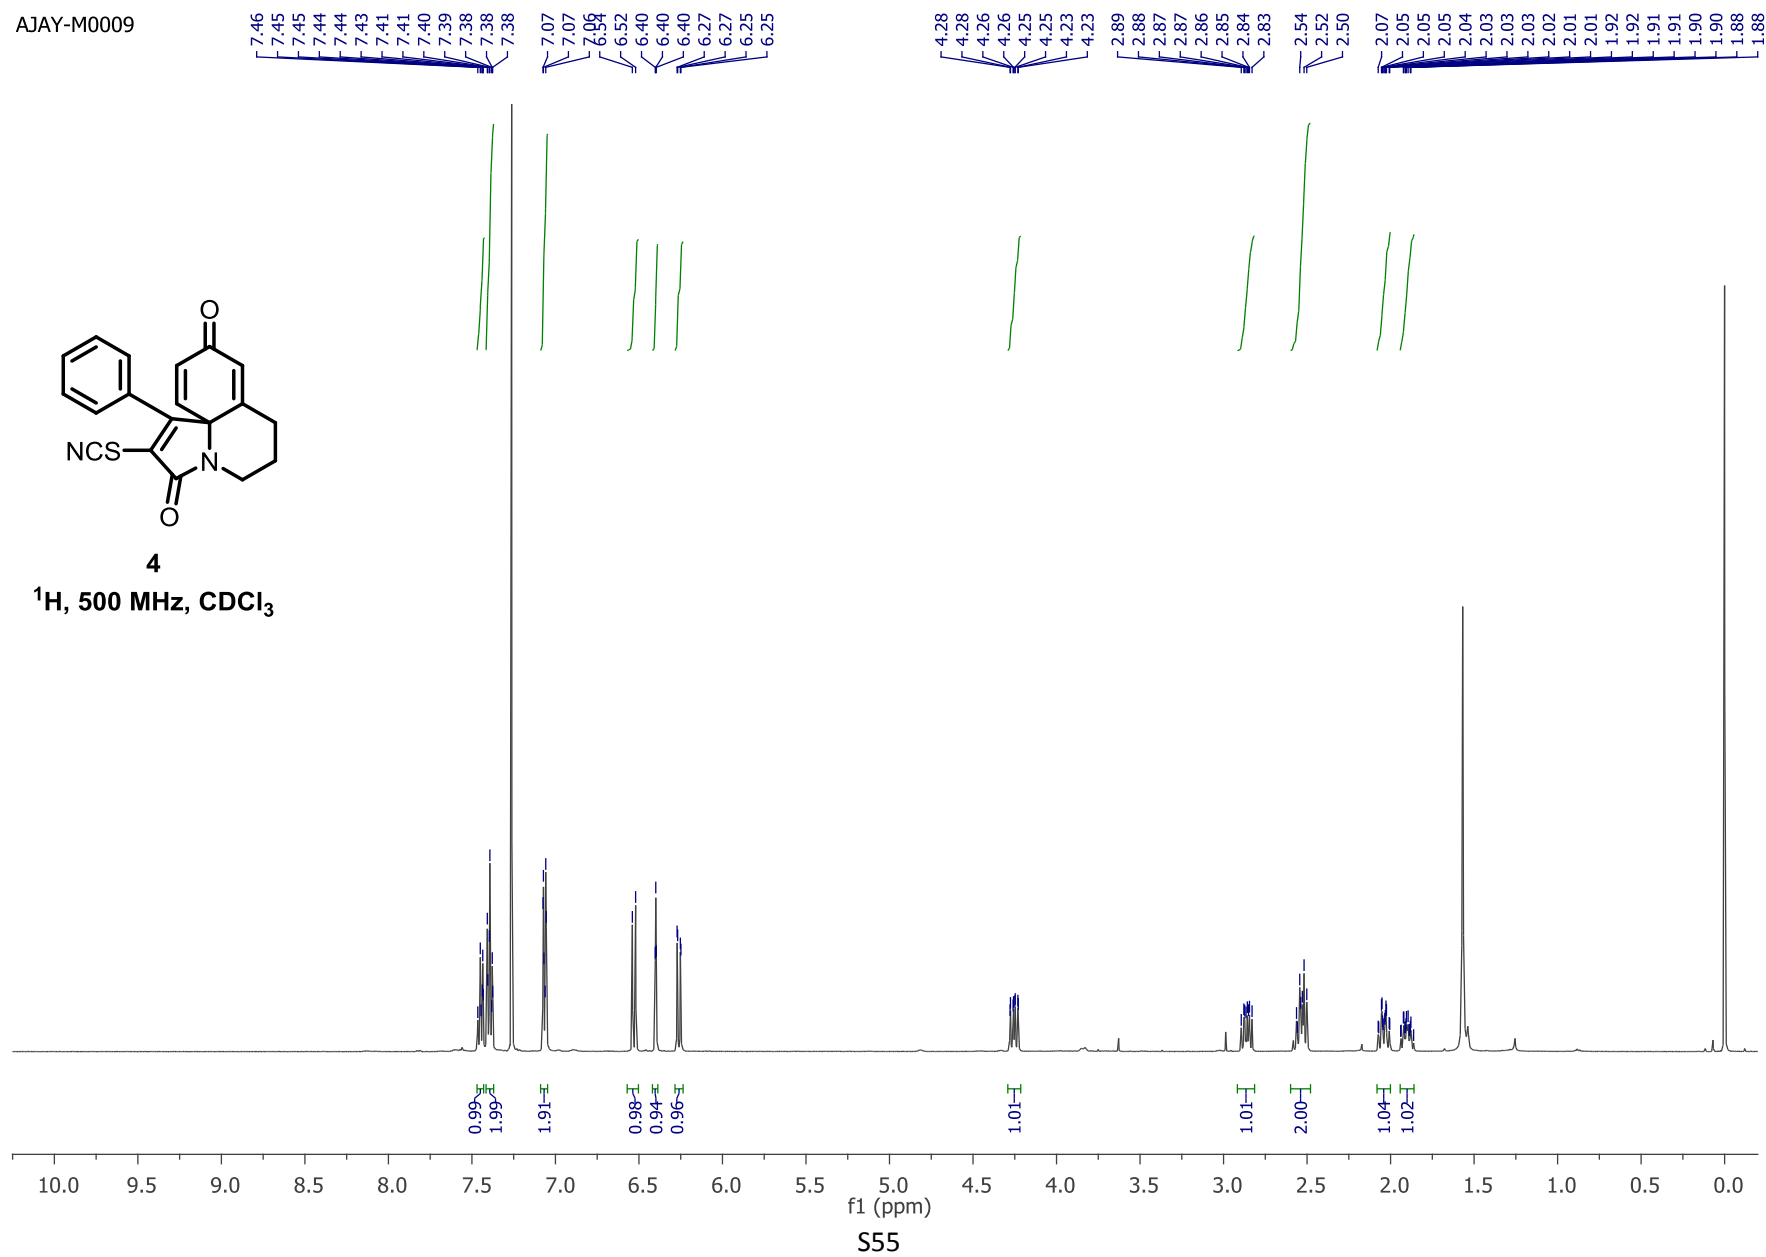

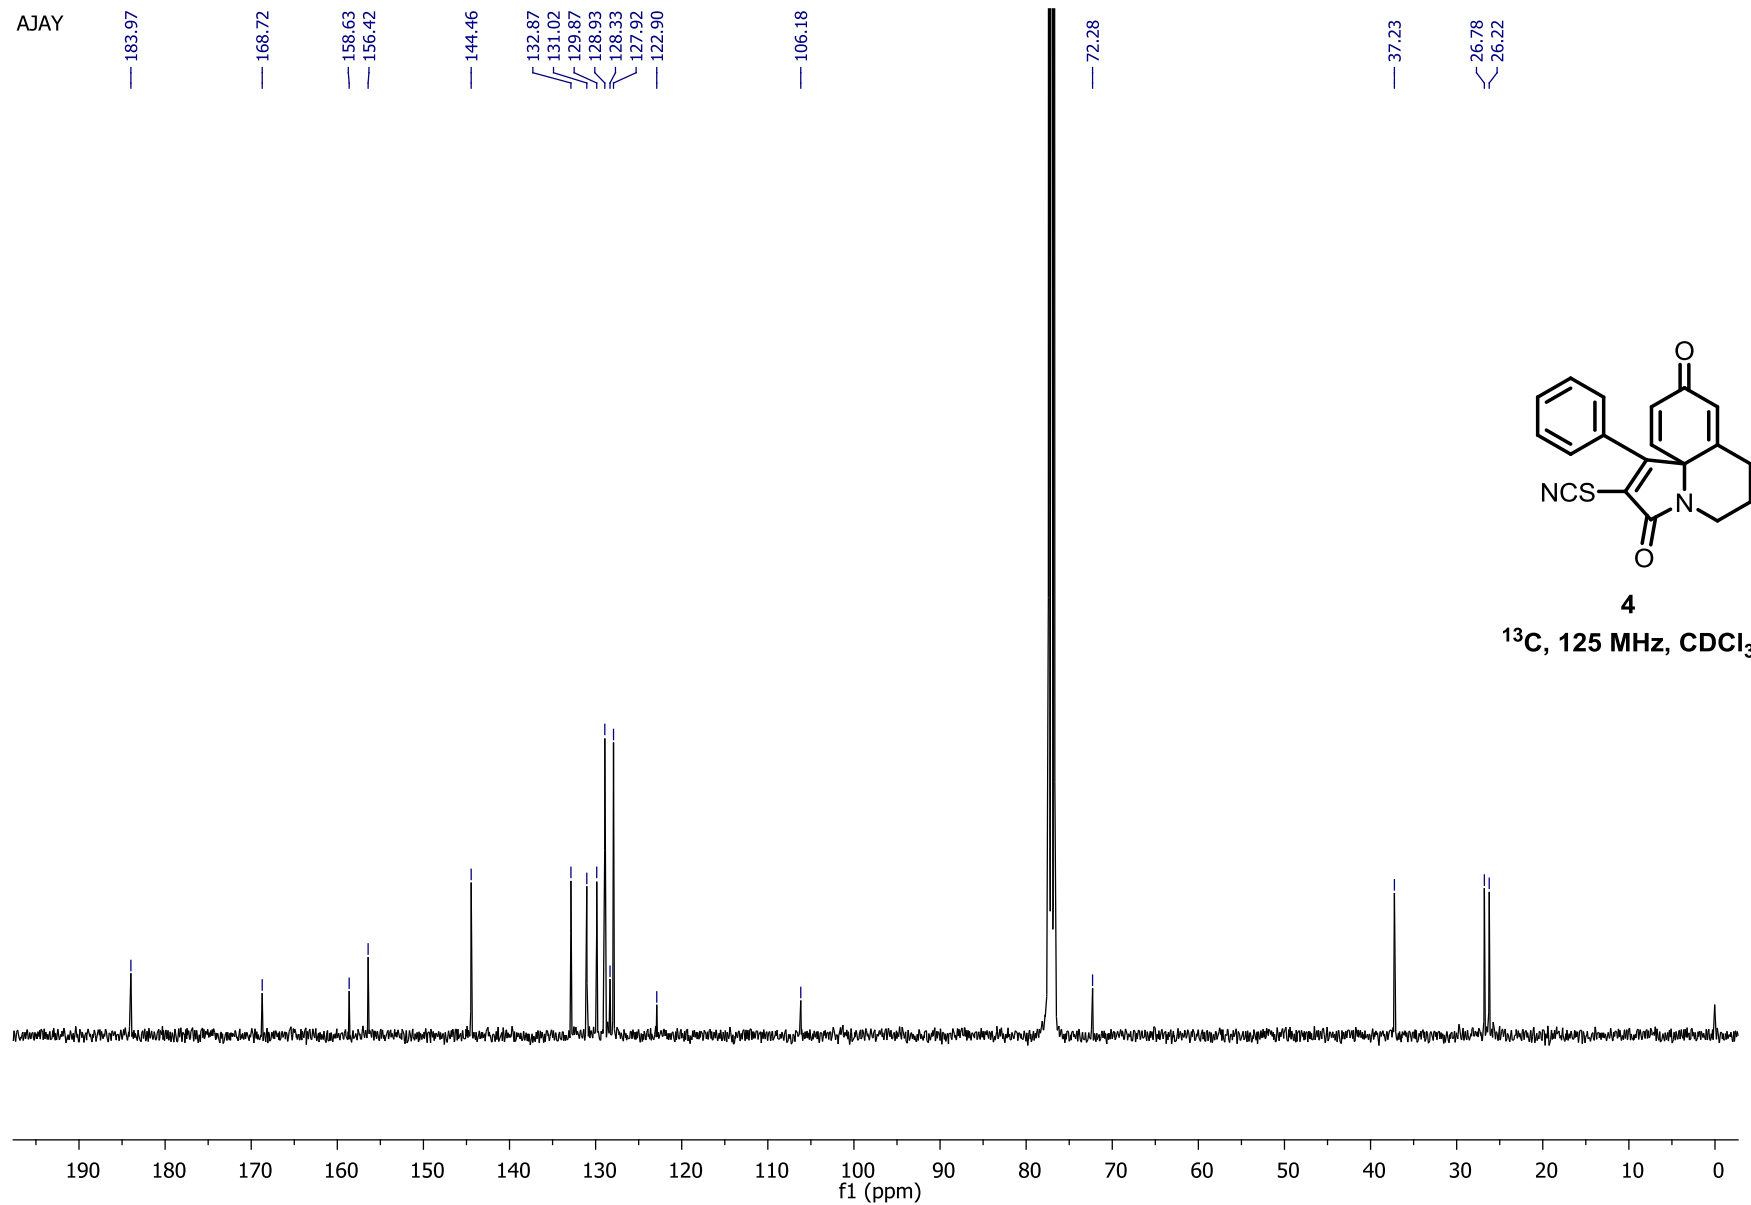



AJAY  
MLP0009  
OSPC1886

7.57  
7.55  
7.55  
7.54  
7.53  
7.50  
7.48  
7.47  
7.46  
7.34  
7.33  
7.32  
6.70  
6.69  
6.67  
6.66  
6.48  
6.45  
6.45

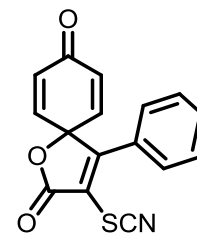

6a

$^1\text{H}$  NMR, 400 MHz,  $\text{CDCl}_3$

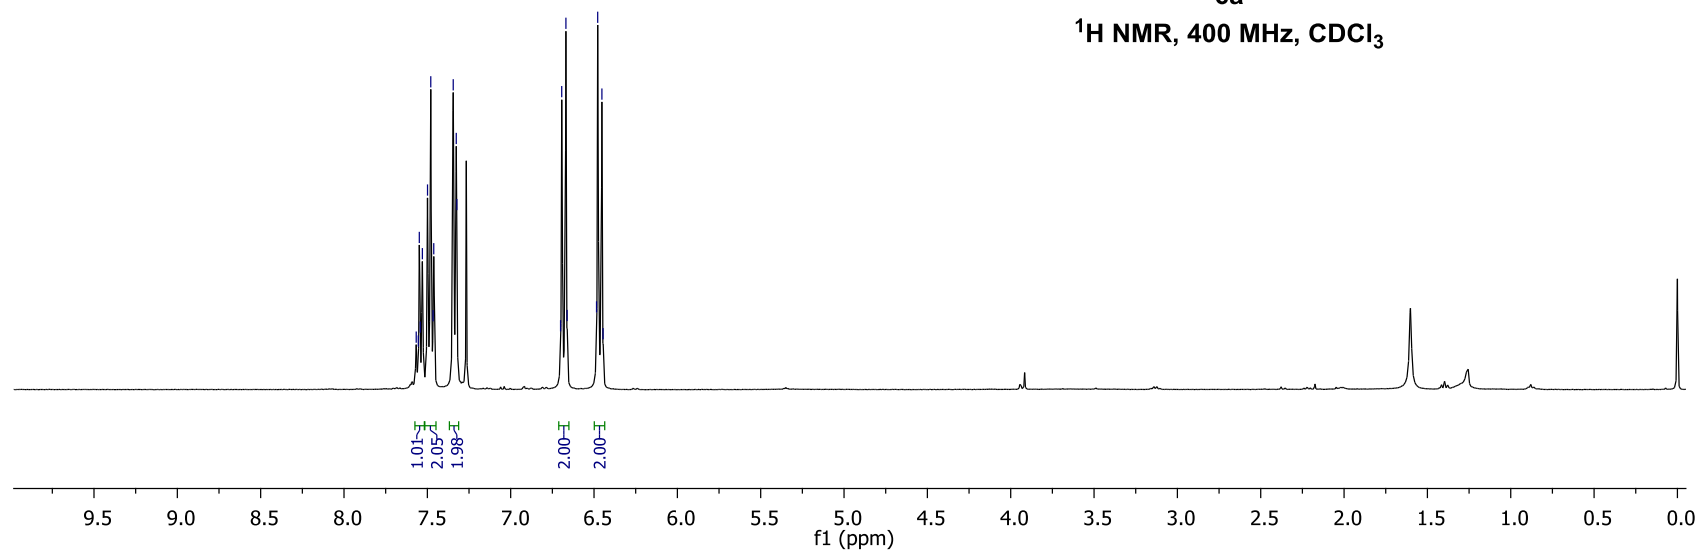

AJAY  
MLP0009  
OSPC1886

— 183.10

165.97  
165.73

140.65  
139.72

132.75  
132.30  
129.47  
127.55

— 116.36

— 105.20

— 83.07

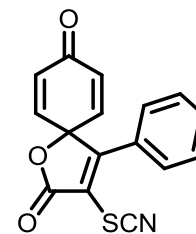

6a

<sup>13</sup>C NMR, 101 MHz, CDCl<sub>3</sub>

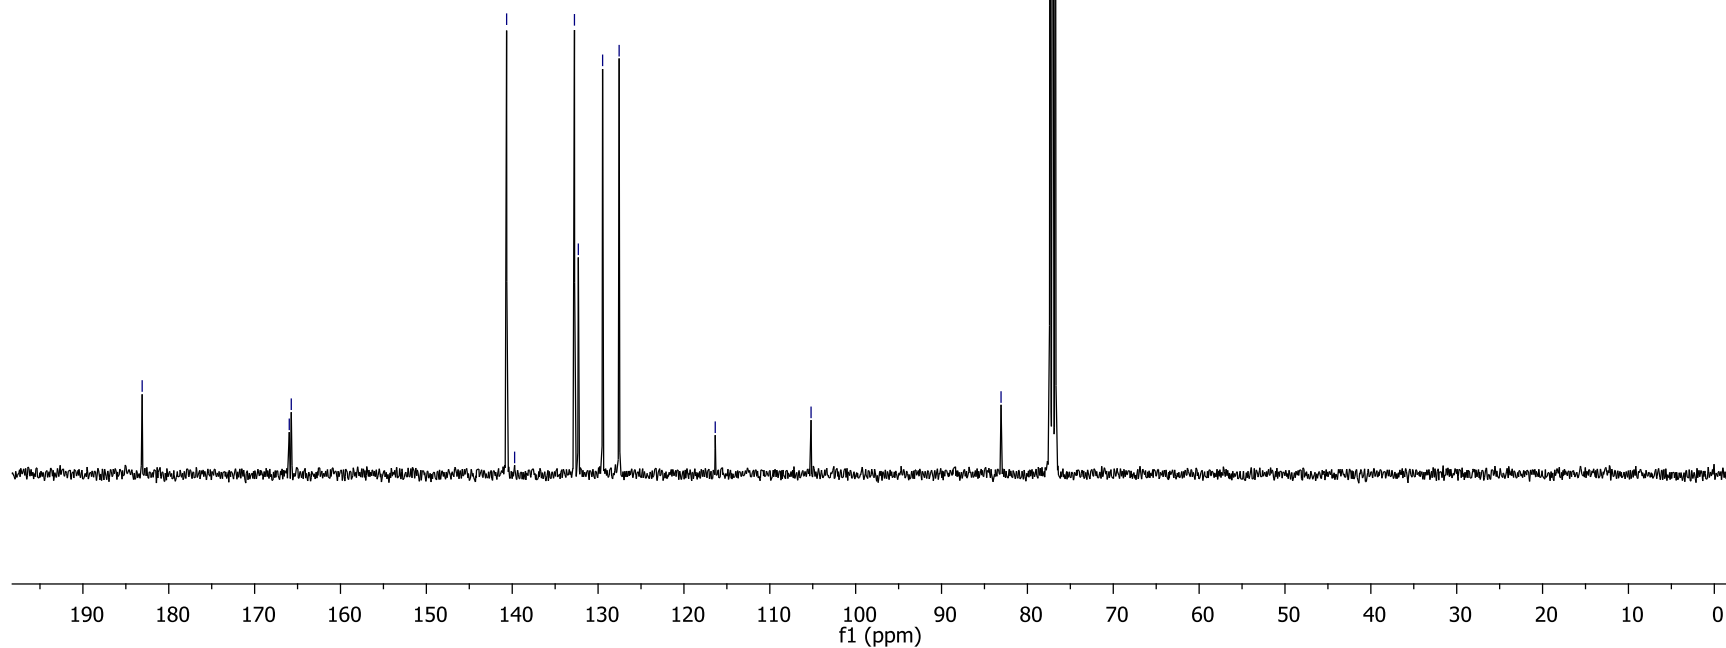

AJAY

7.48  
7.45  
7.32  
7.29  
6.67  
6.65  
6.49  
6.46

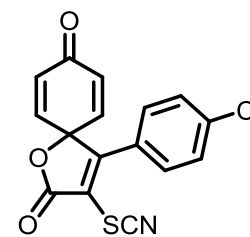

6b

$^1\text{H}$  NMR, 400 MHz,  $\text{CDCl}_3$

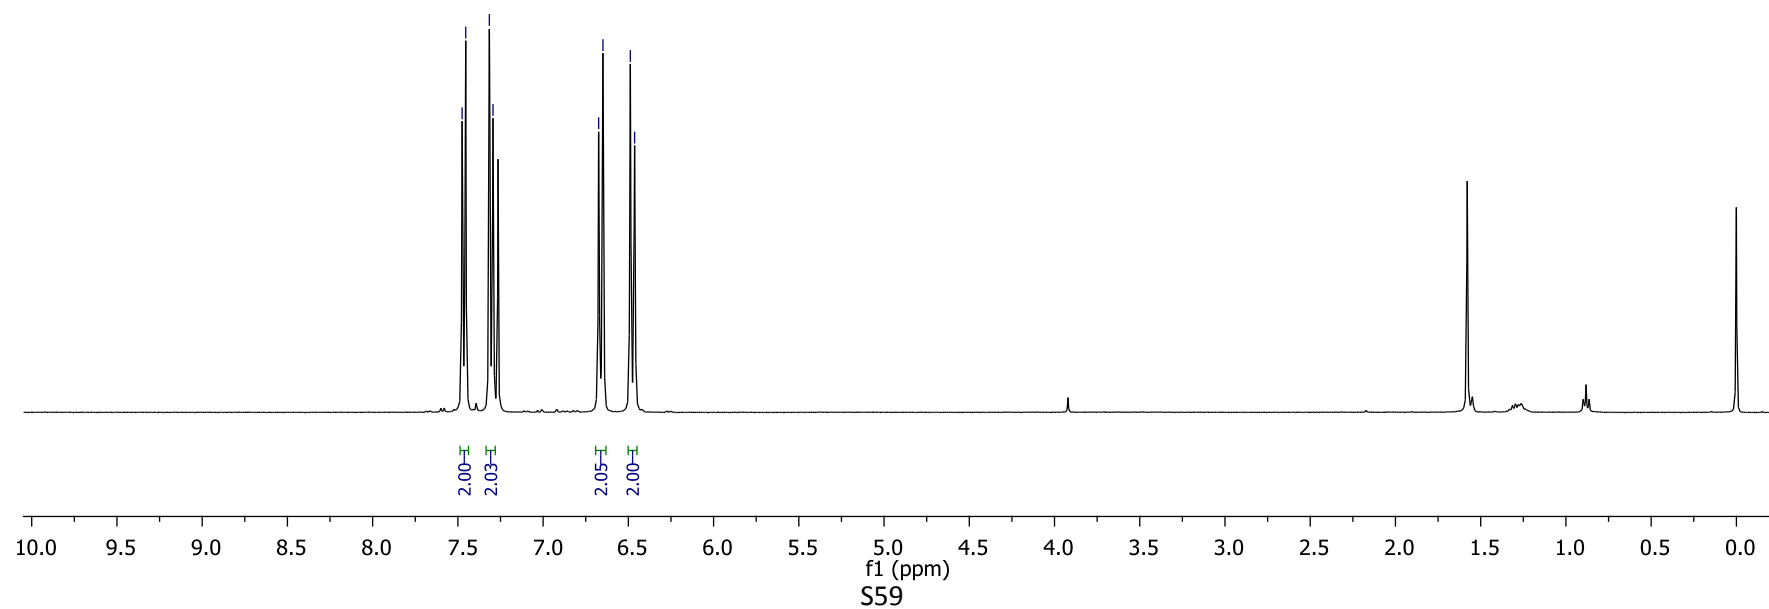

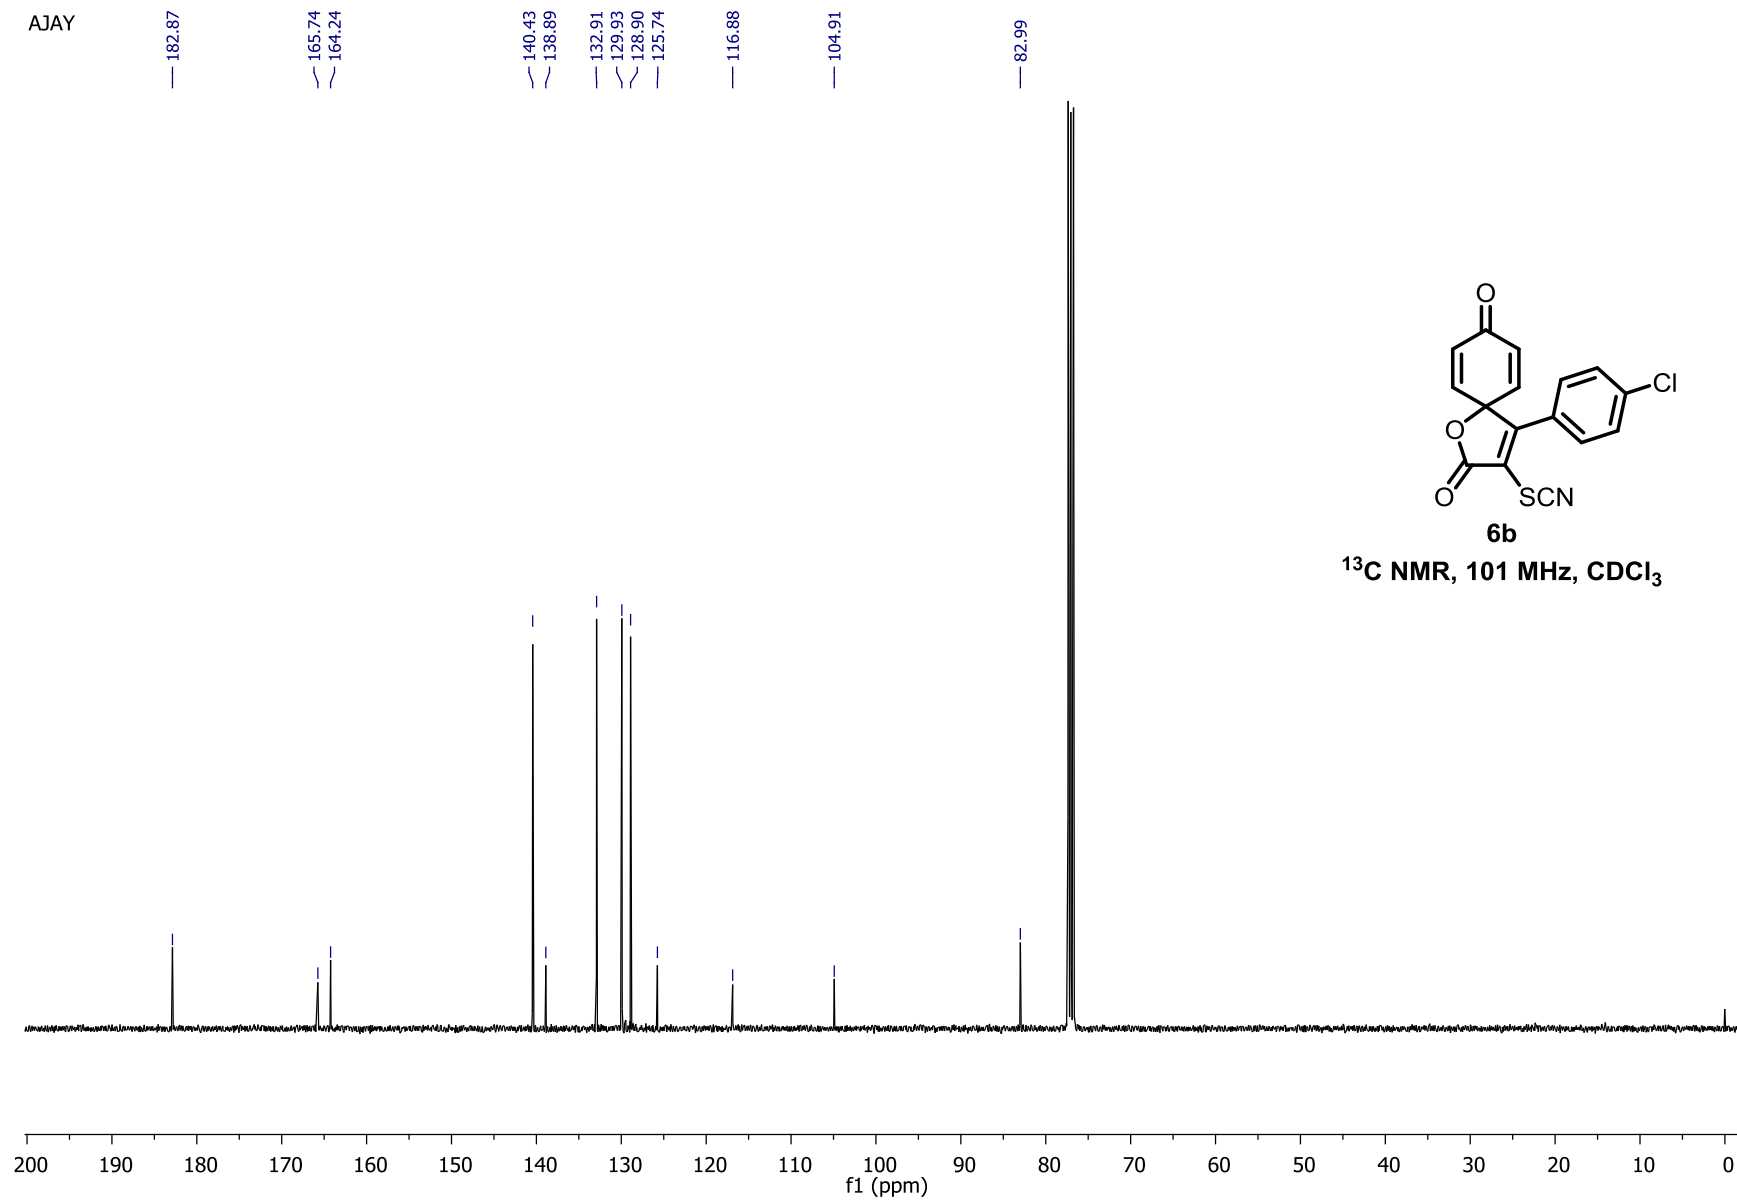

AJAY

8.05  
8.02

7.43  
7.41

6.69  
6.66

6.48  
6.46

2.63

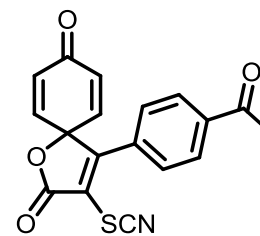

6c

$^1\text{H}$  NMR, 400 MHz,  $\text{CDCl}_3$

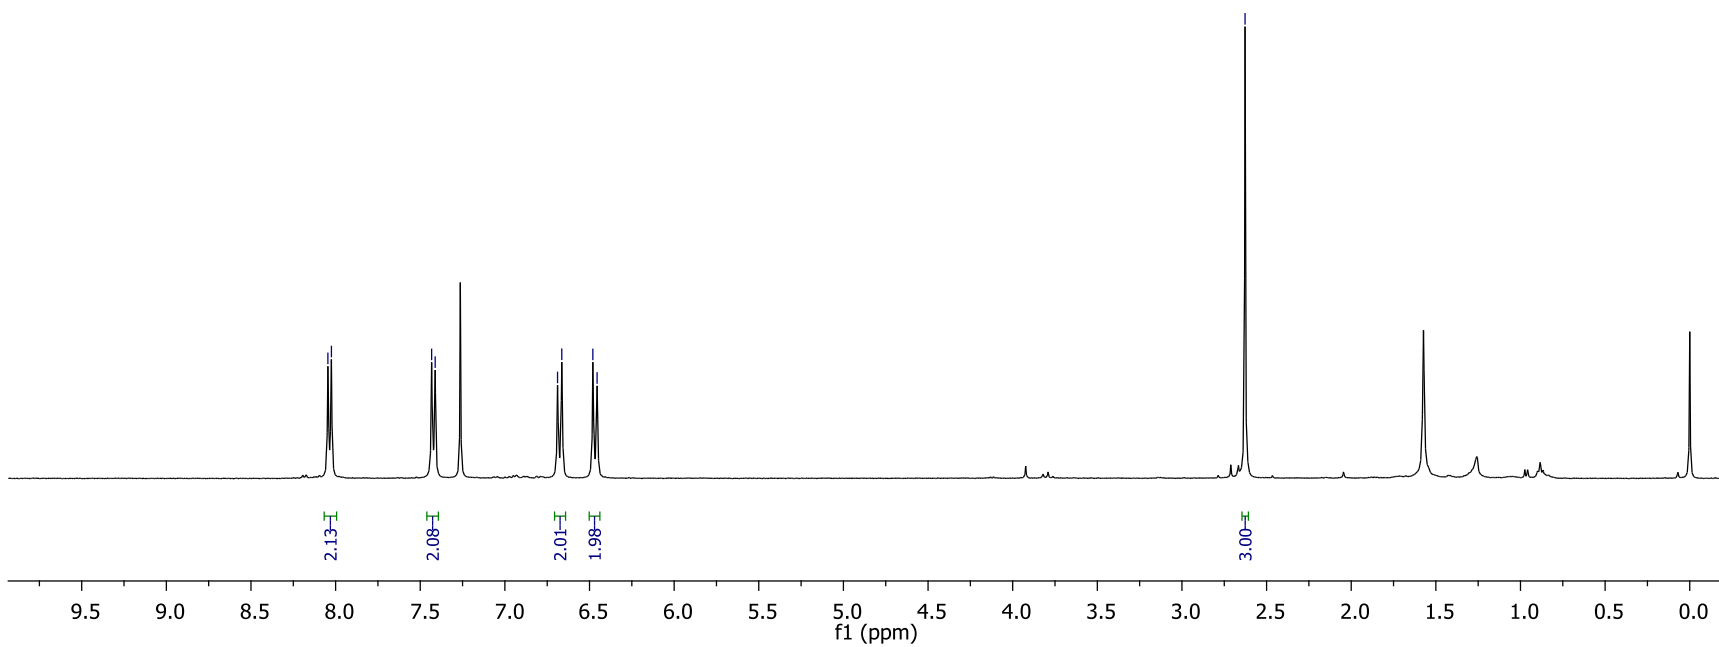

AJAY

— 196.49

— 182.76

— 165.61  
— 164.11

— 140.20  
— 139.44

— 132.99  
— 131.42

— 129.09  
— 127.97

— 117.99

— 104.63

— 83.22

— 26.71

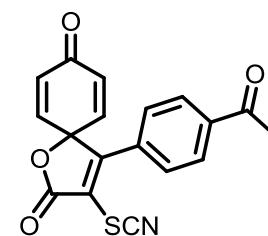

**6c**

<sup>13</sup>C NMR, 101 MHz, CDCl<sub>3</sub>

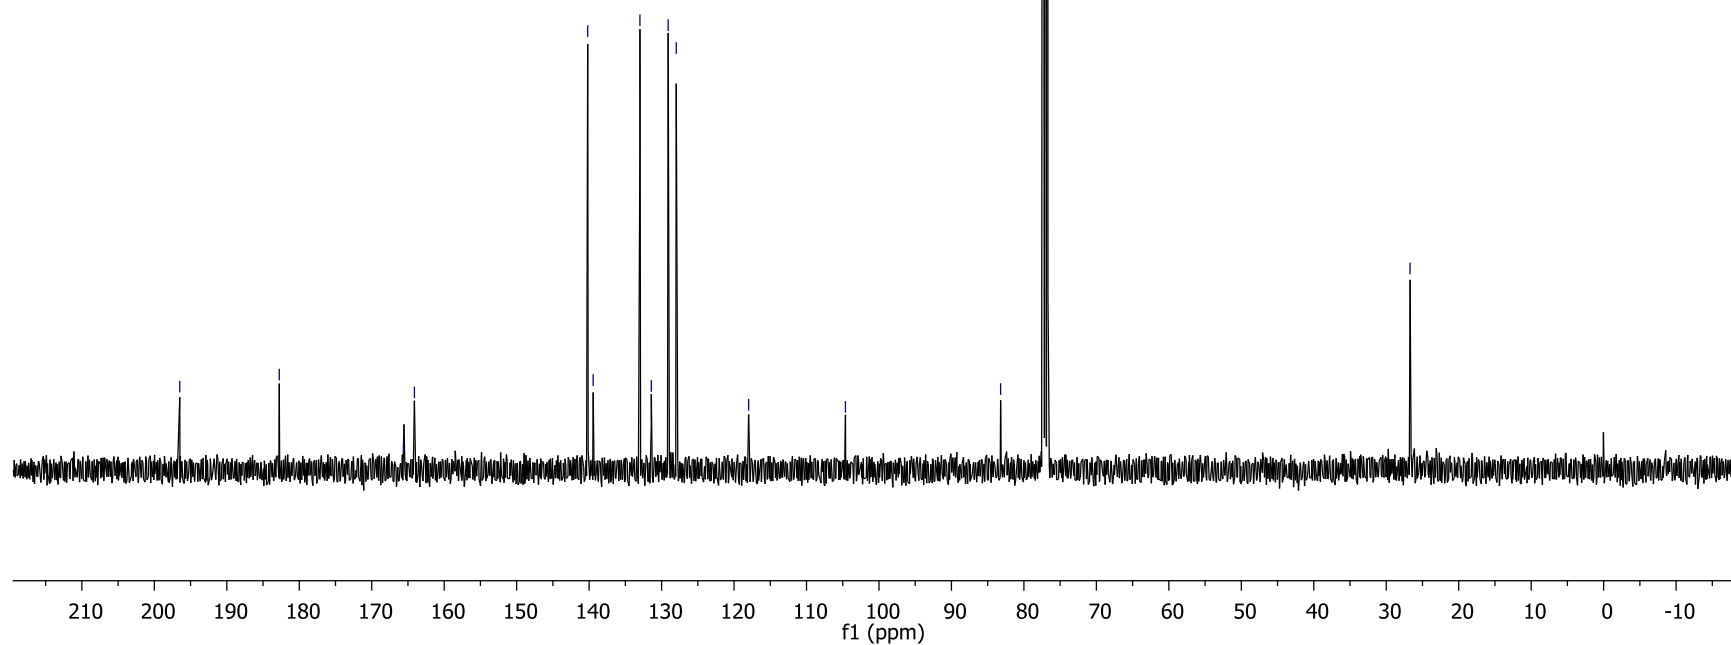

AJAY

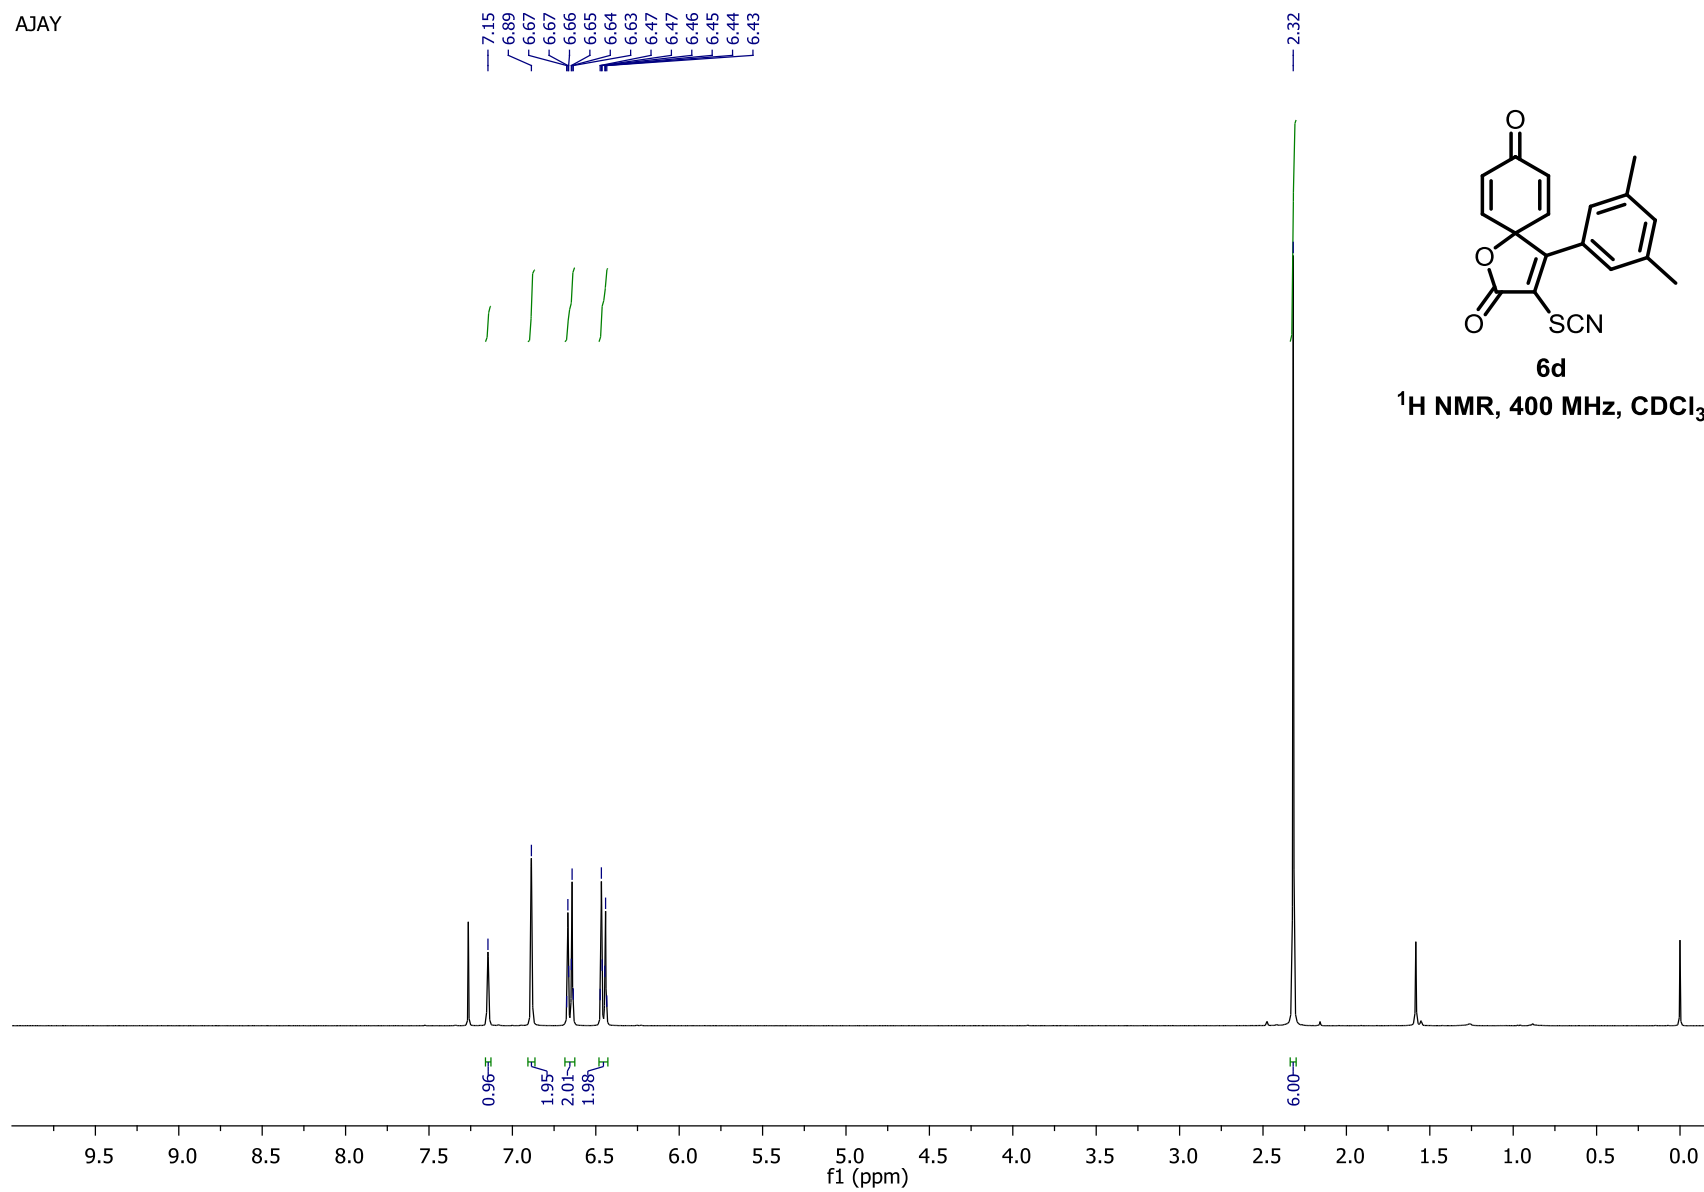

AJAY

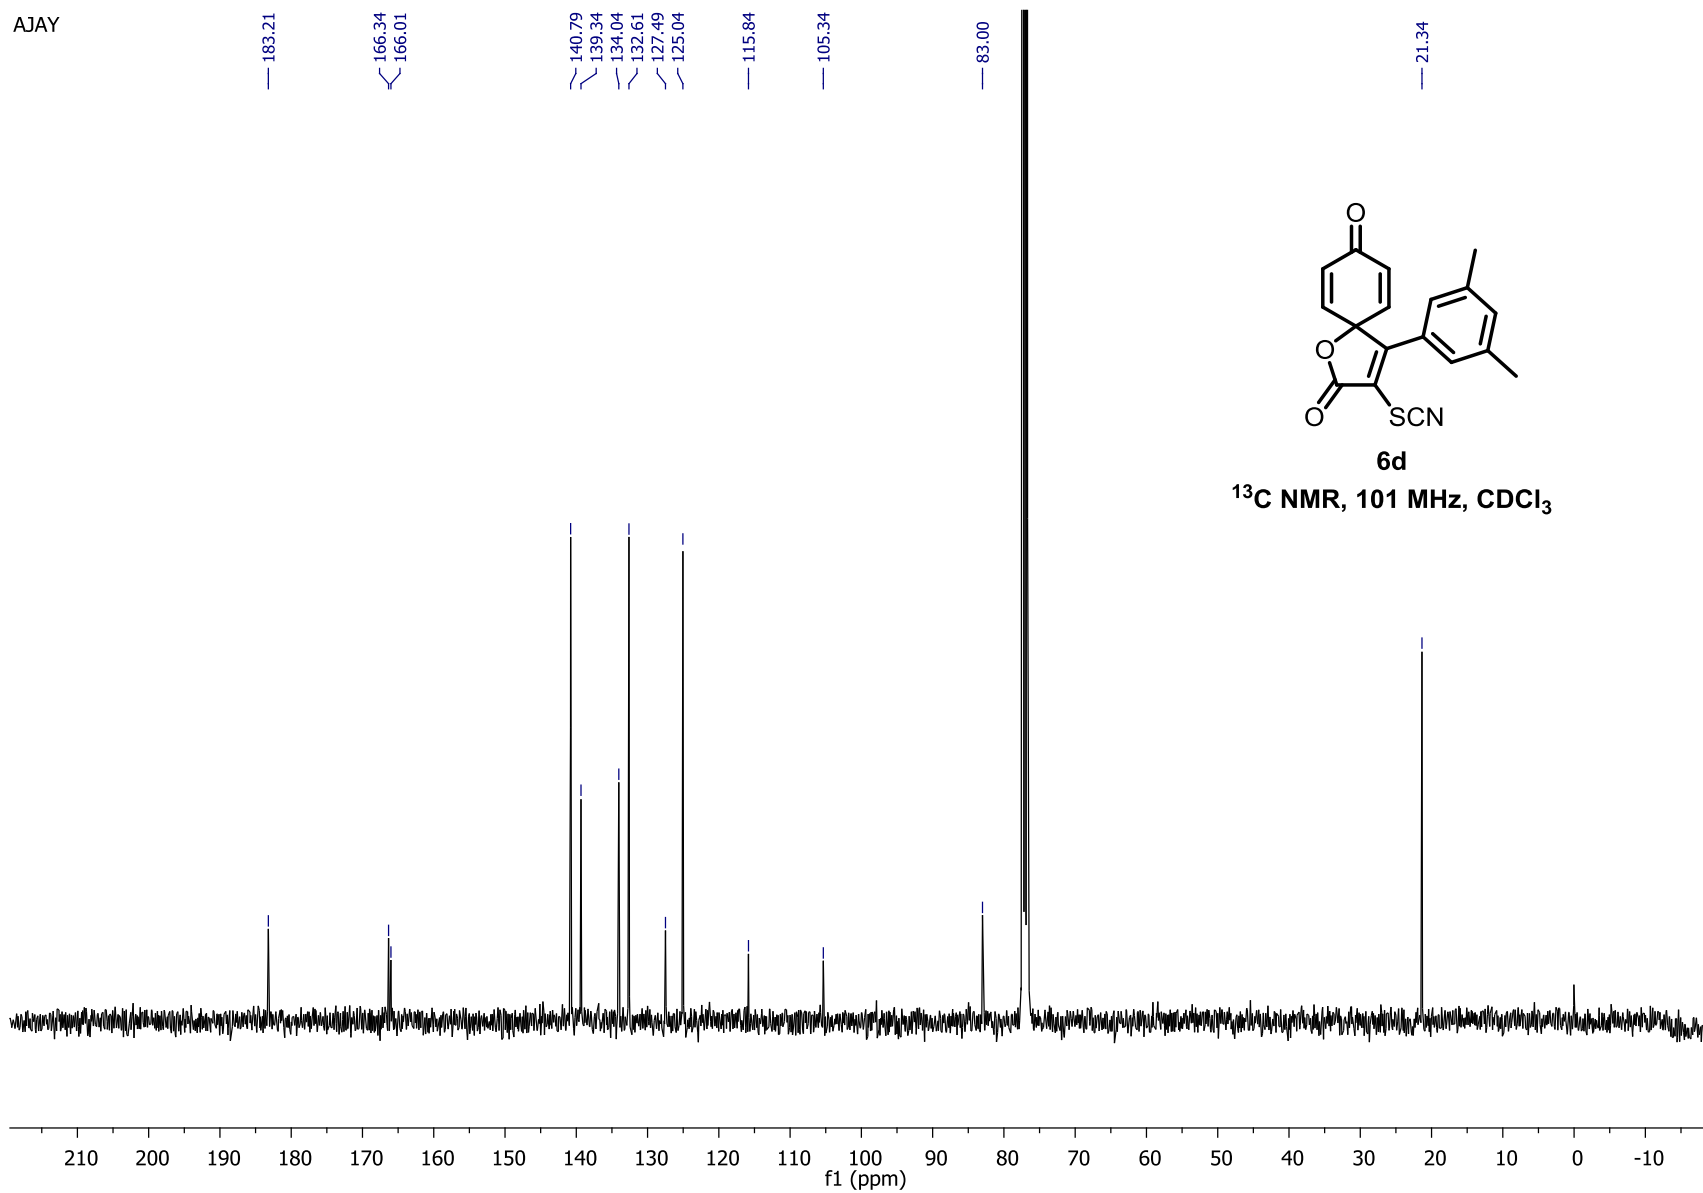



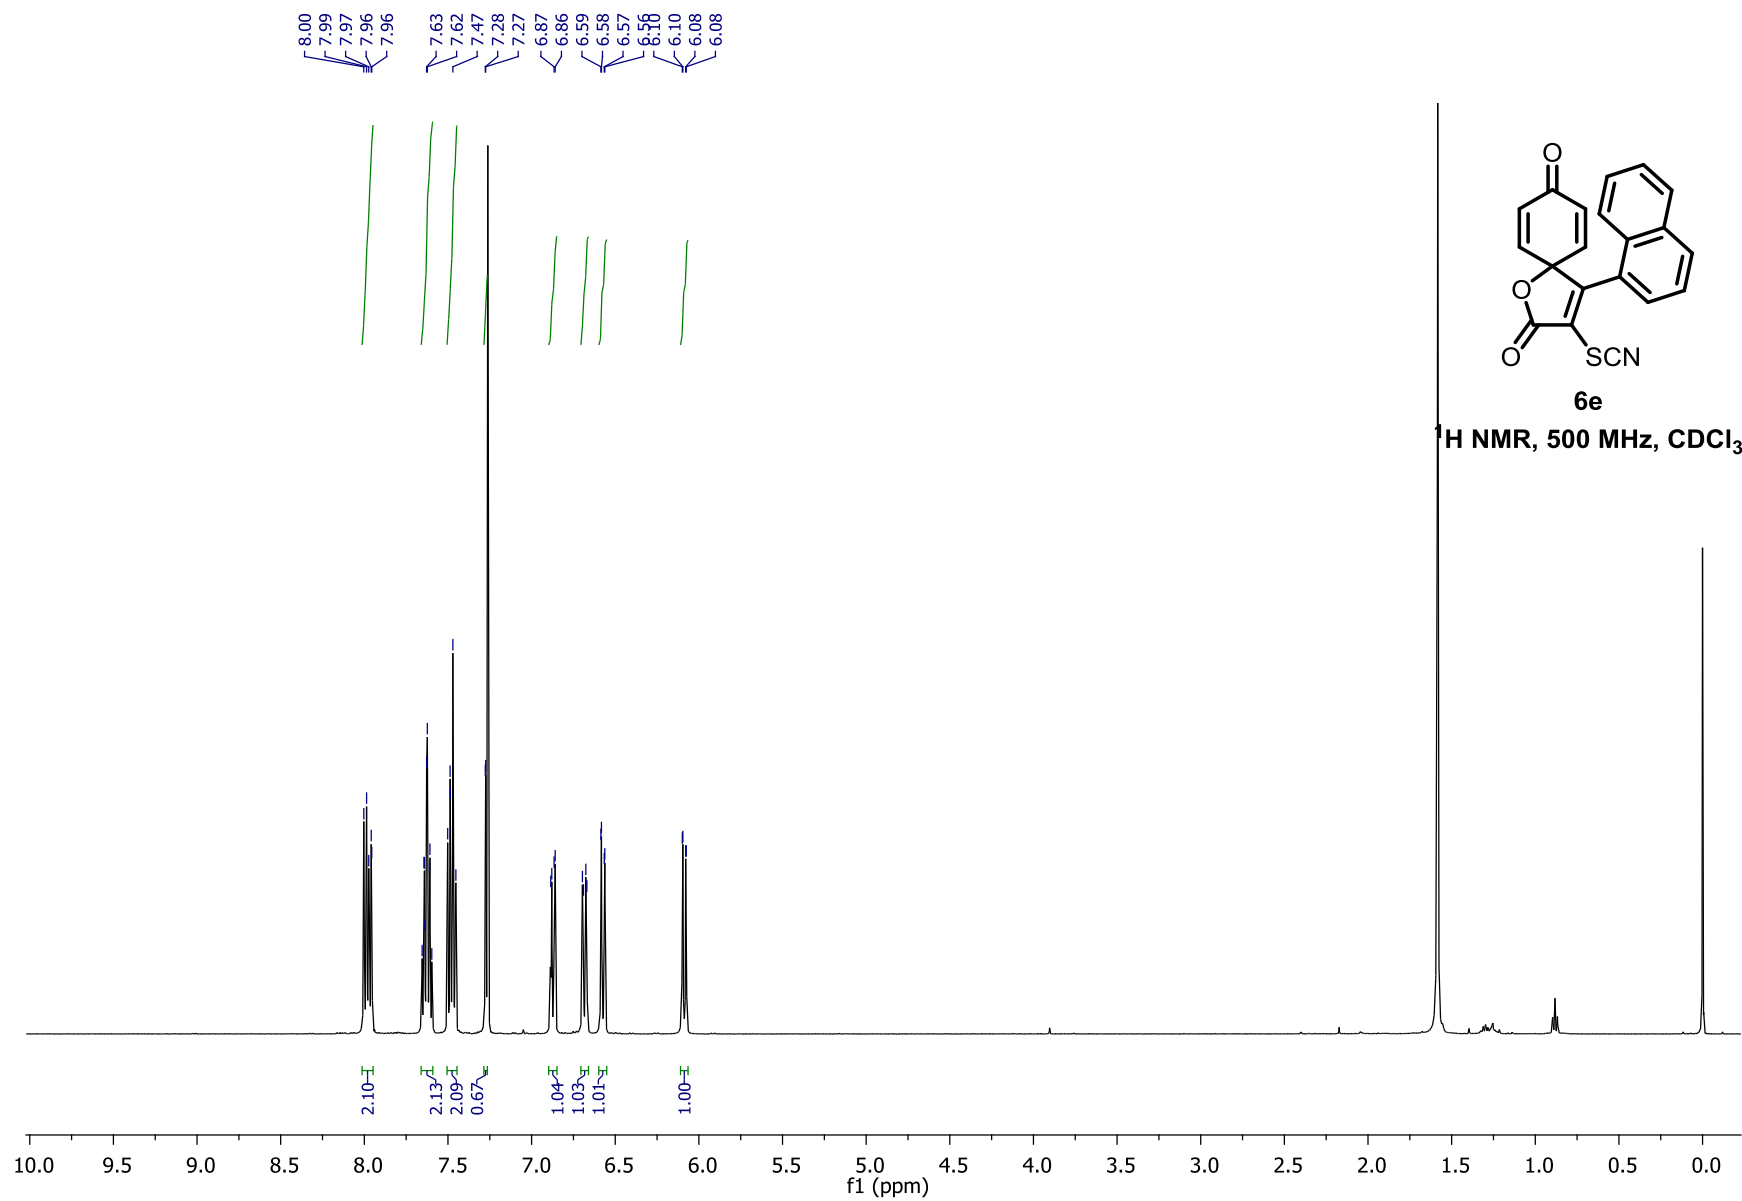

AJAY

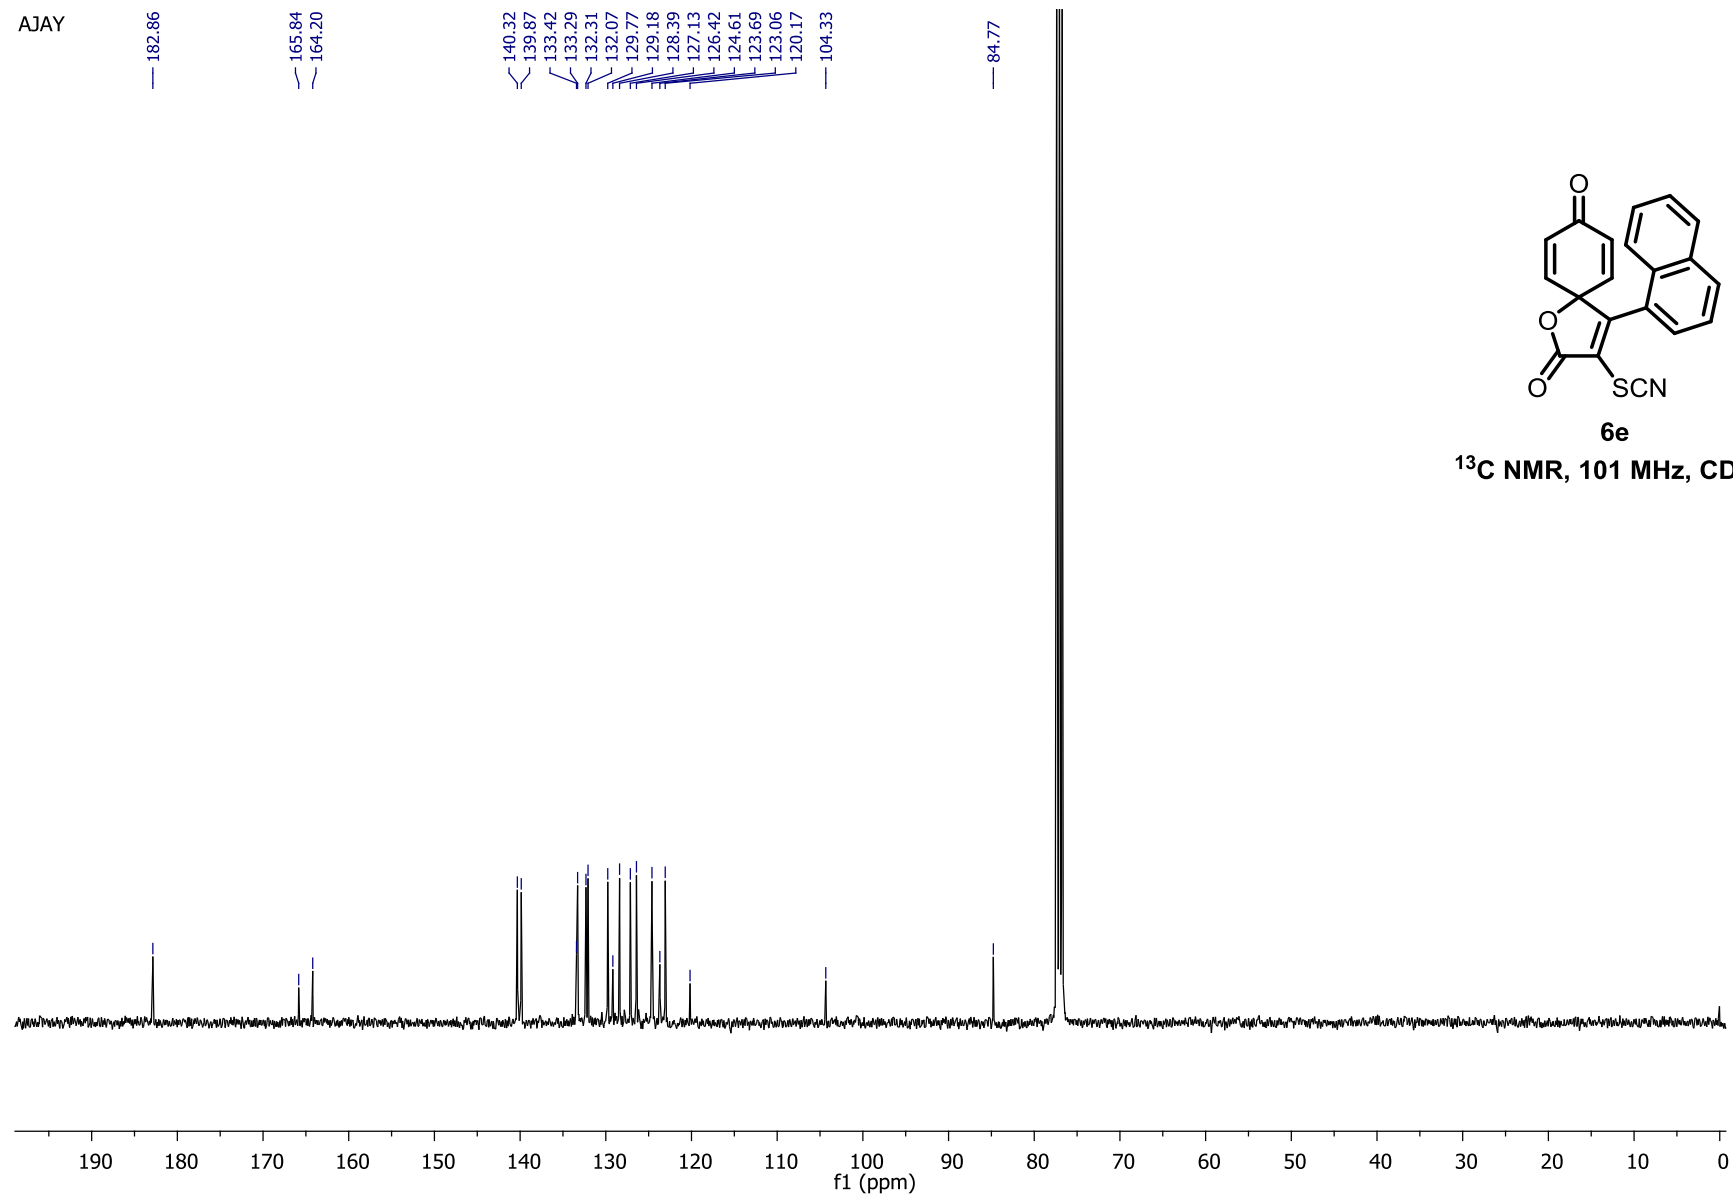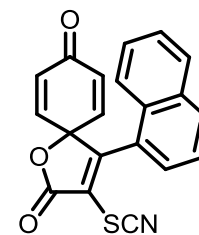

**6e**

<sup>13</sup>C NMR, 101 MHz, CDCl<sub>3</sub>

AJAY

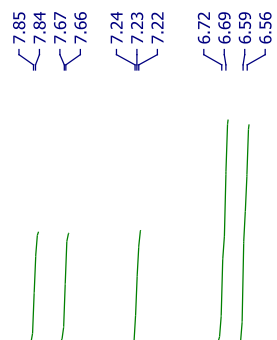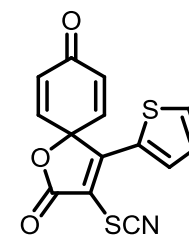

6f

<sup>1</sup>H NMR, 400 MHz, CDCl<sub>3</sub>

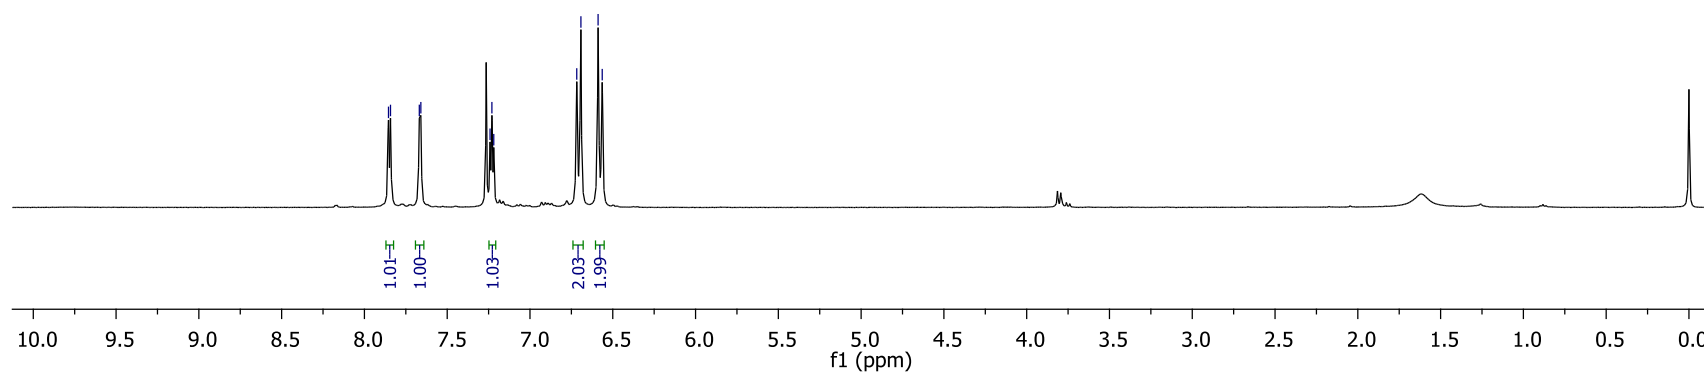

AJAY

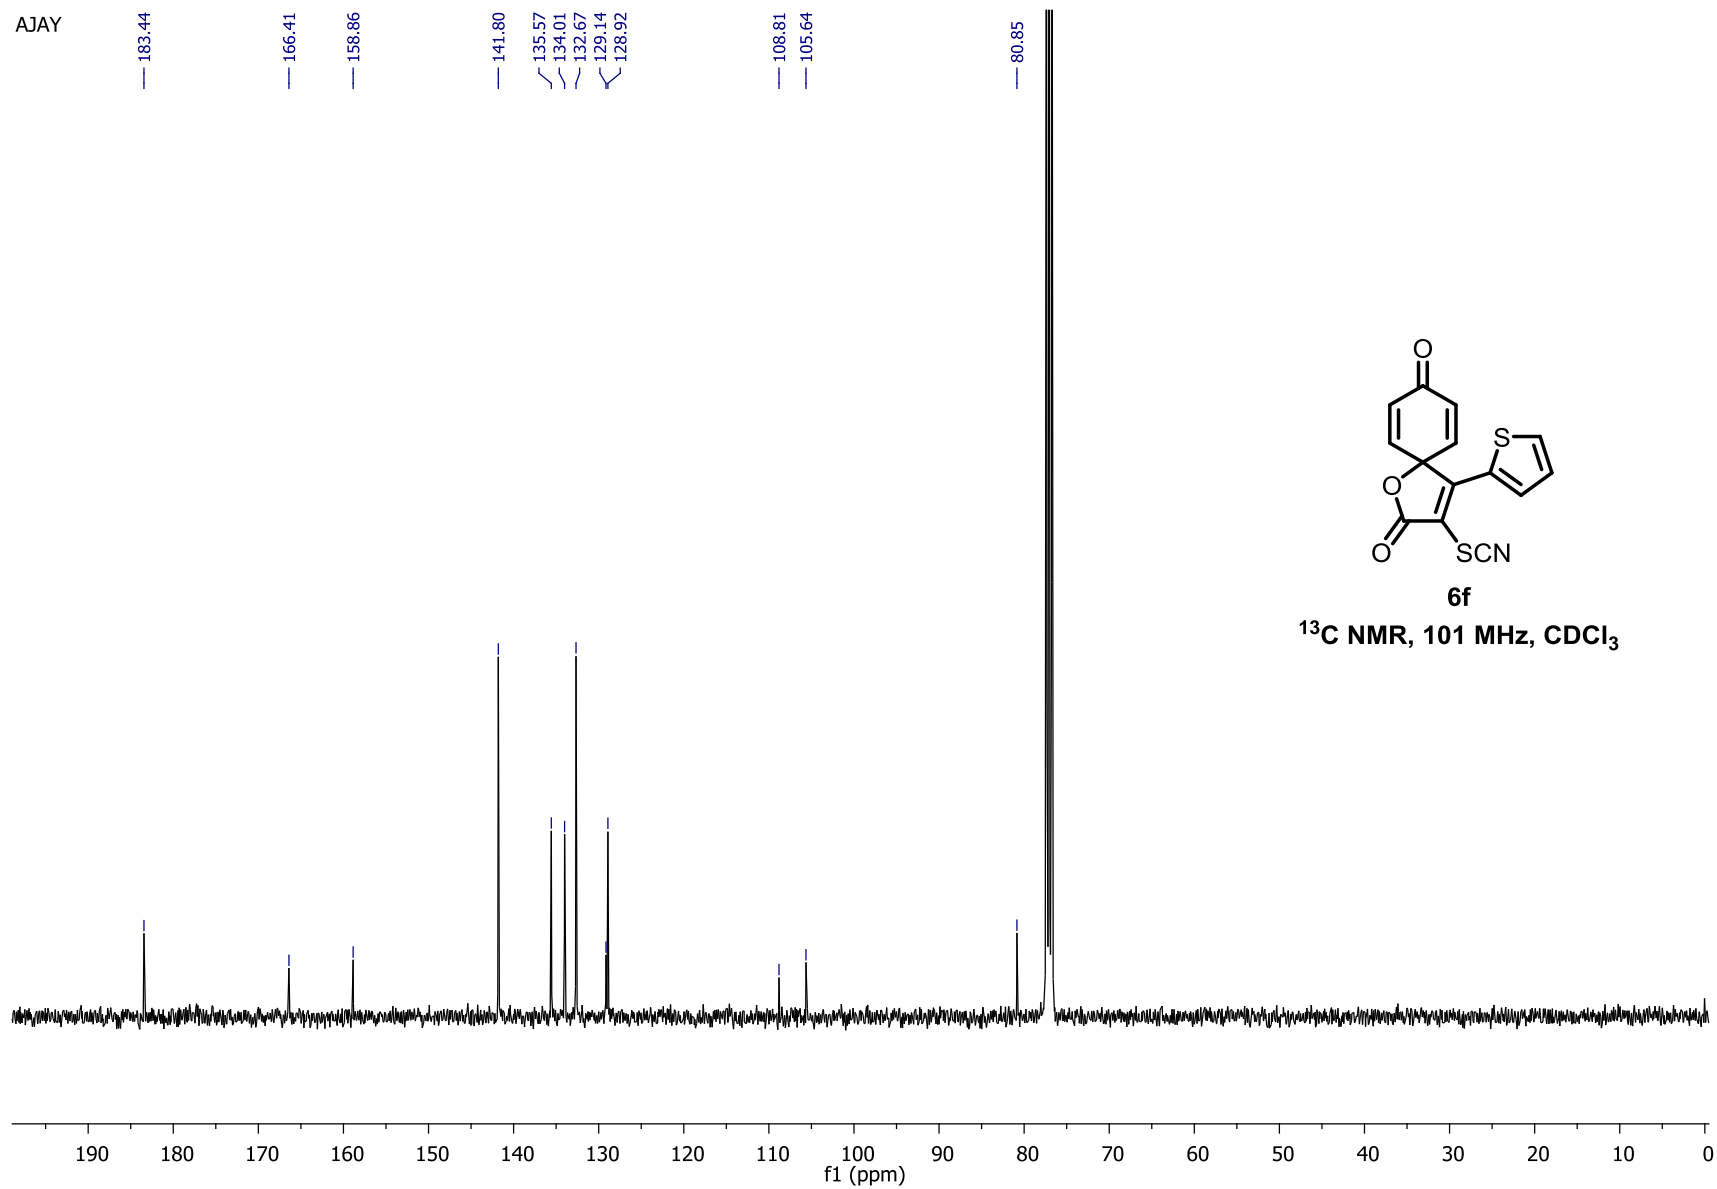

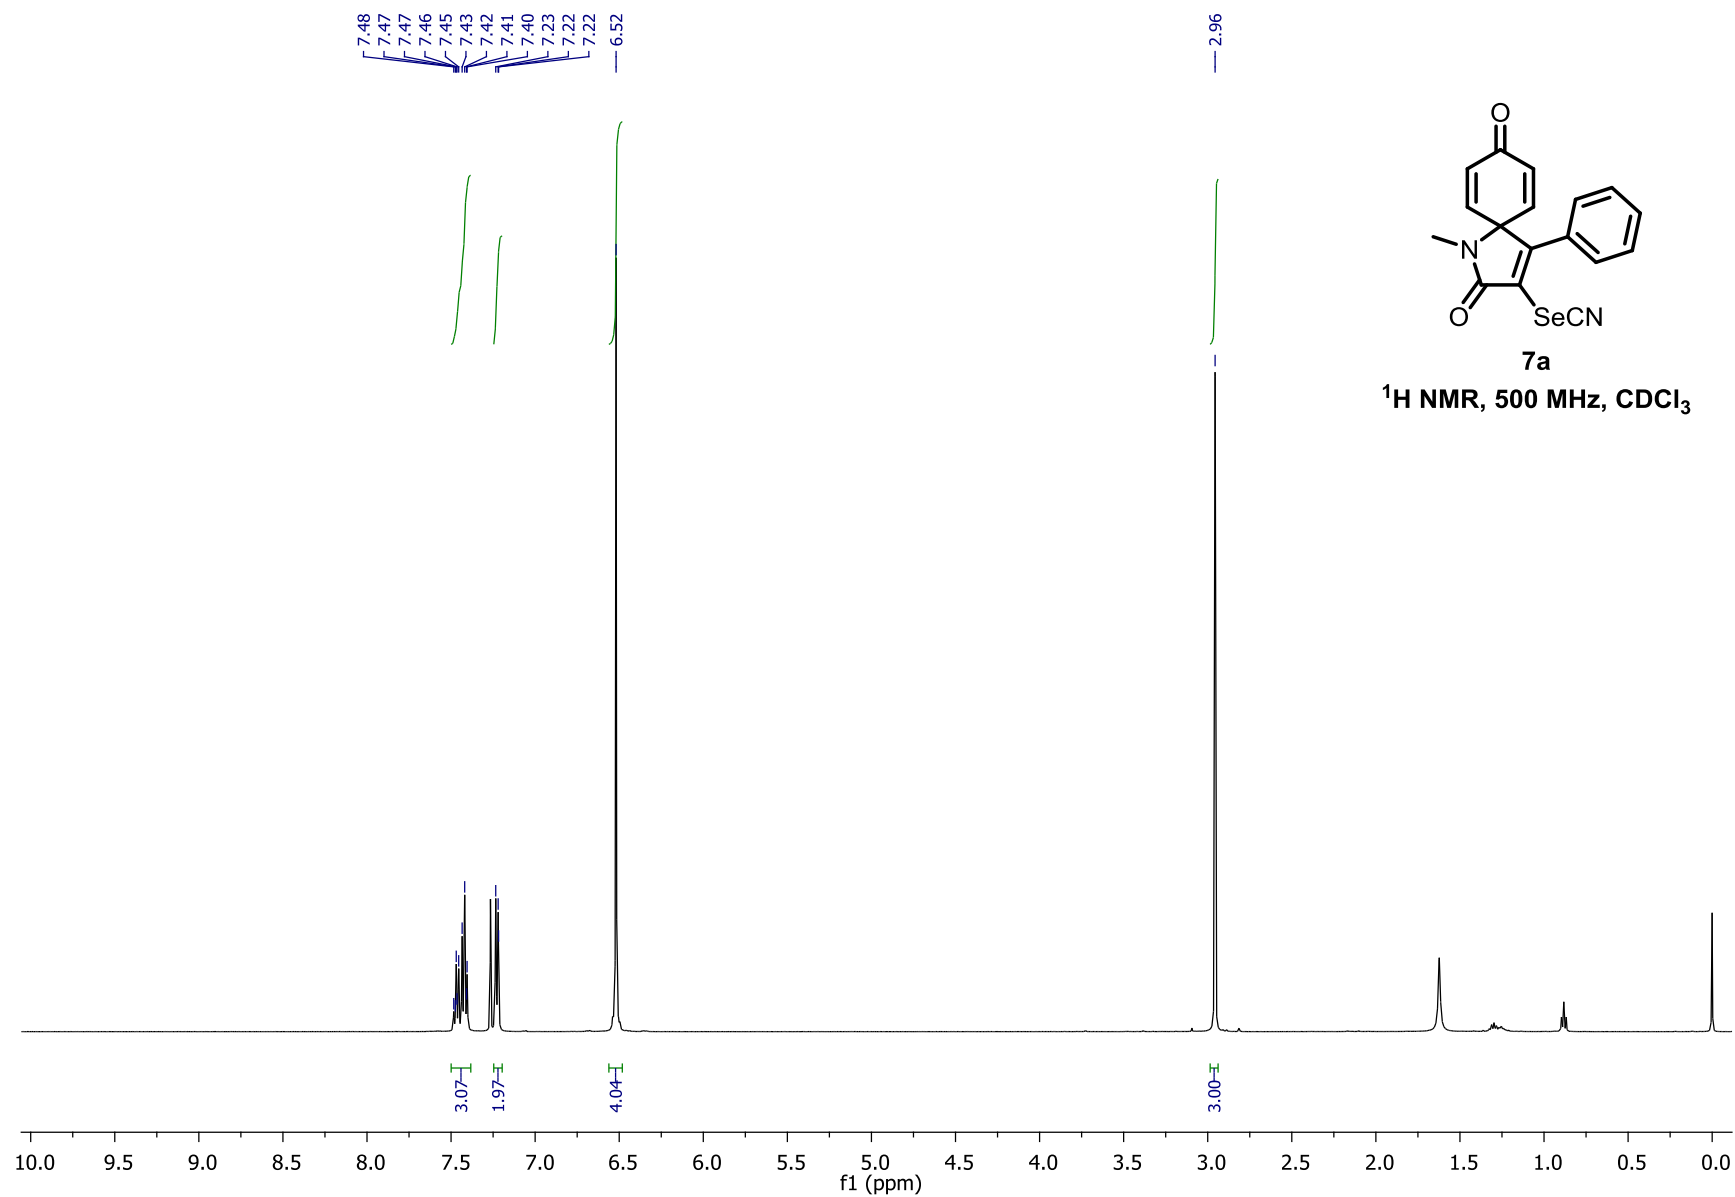

CRR

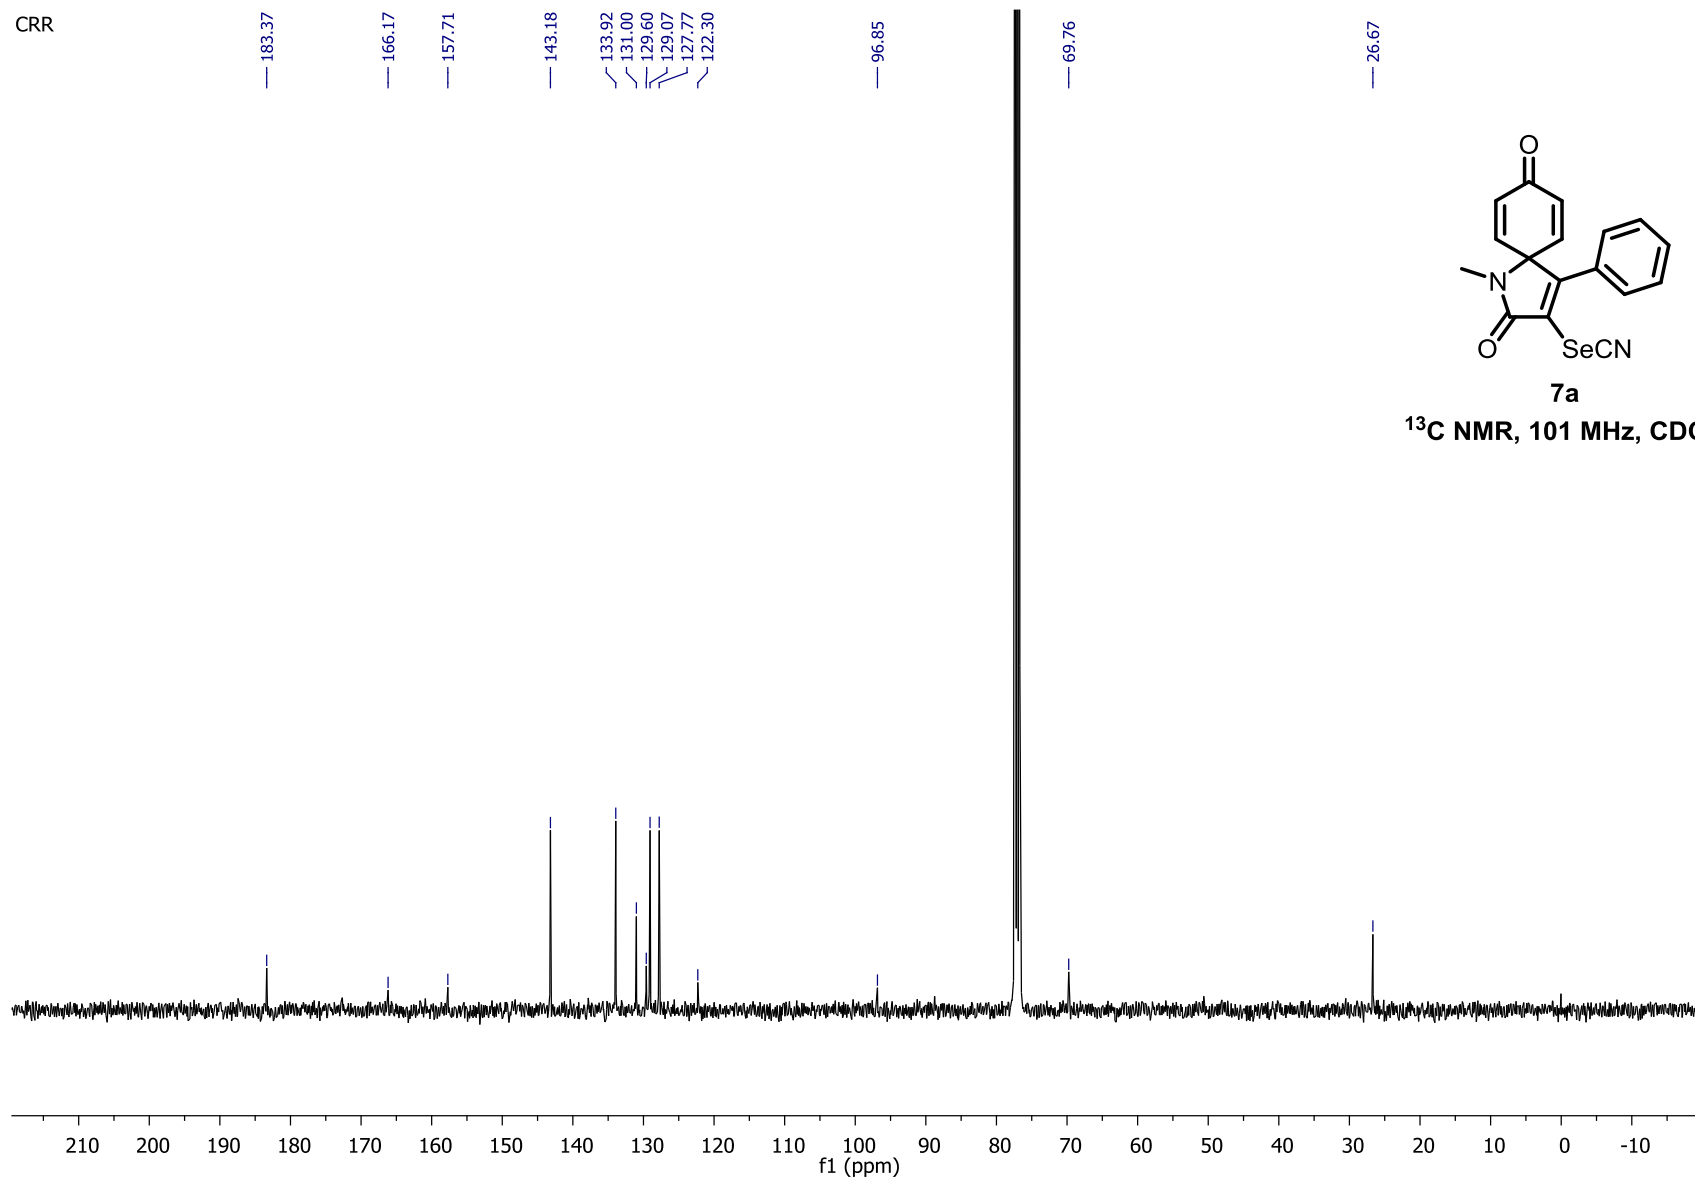

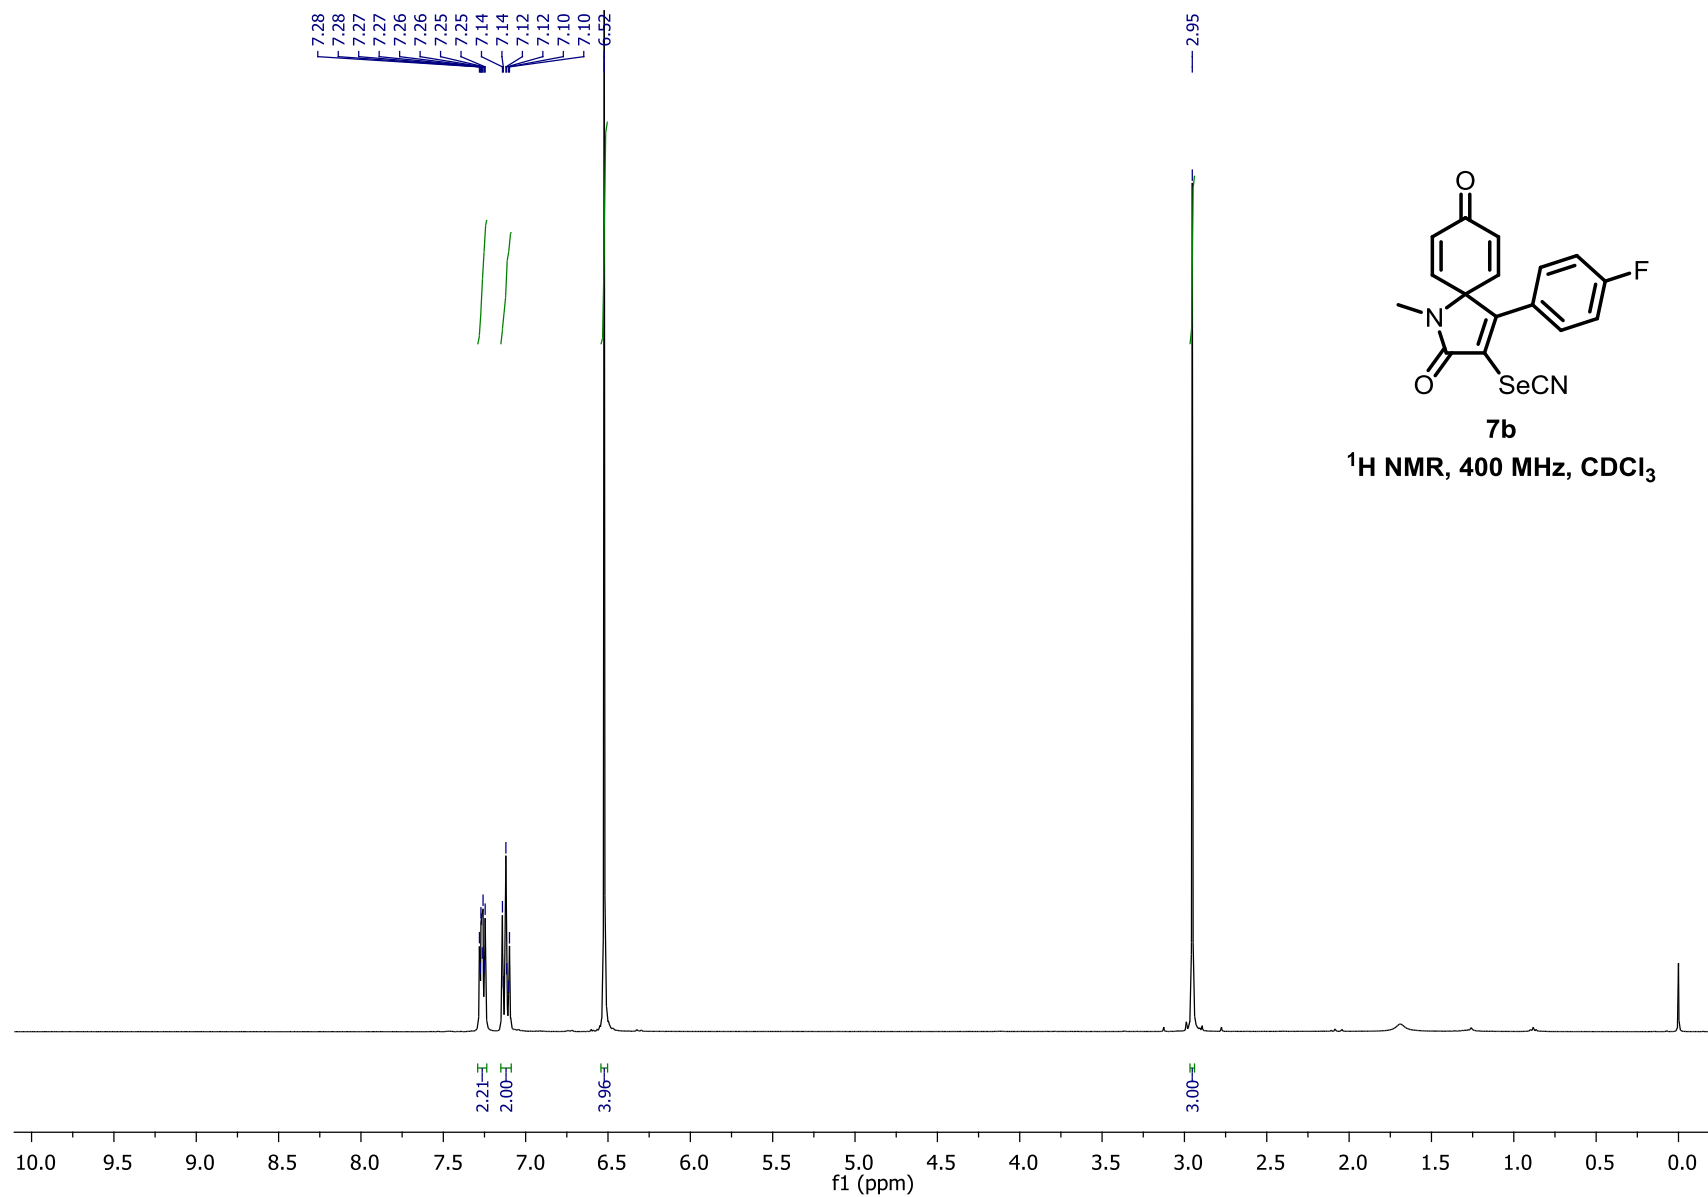

CRR

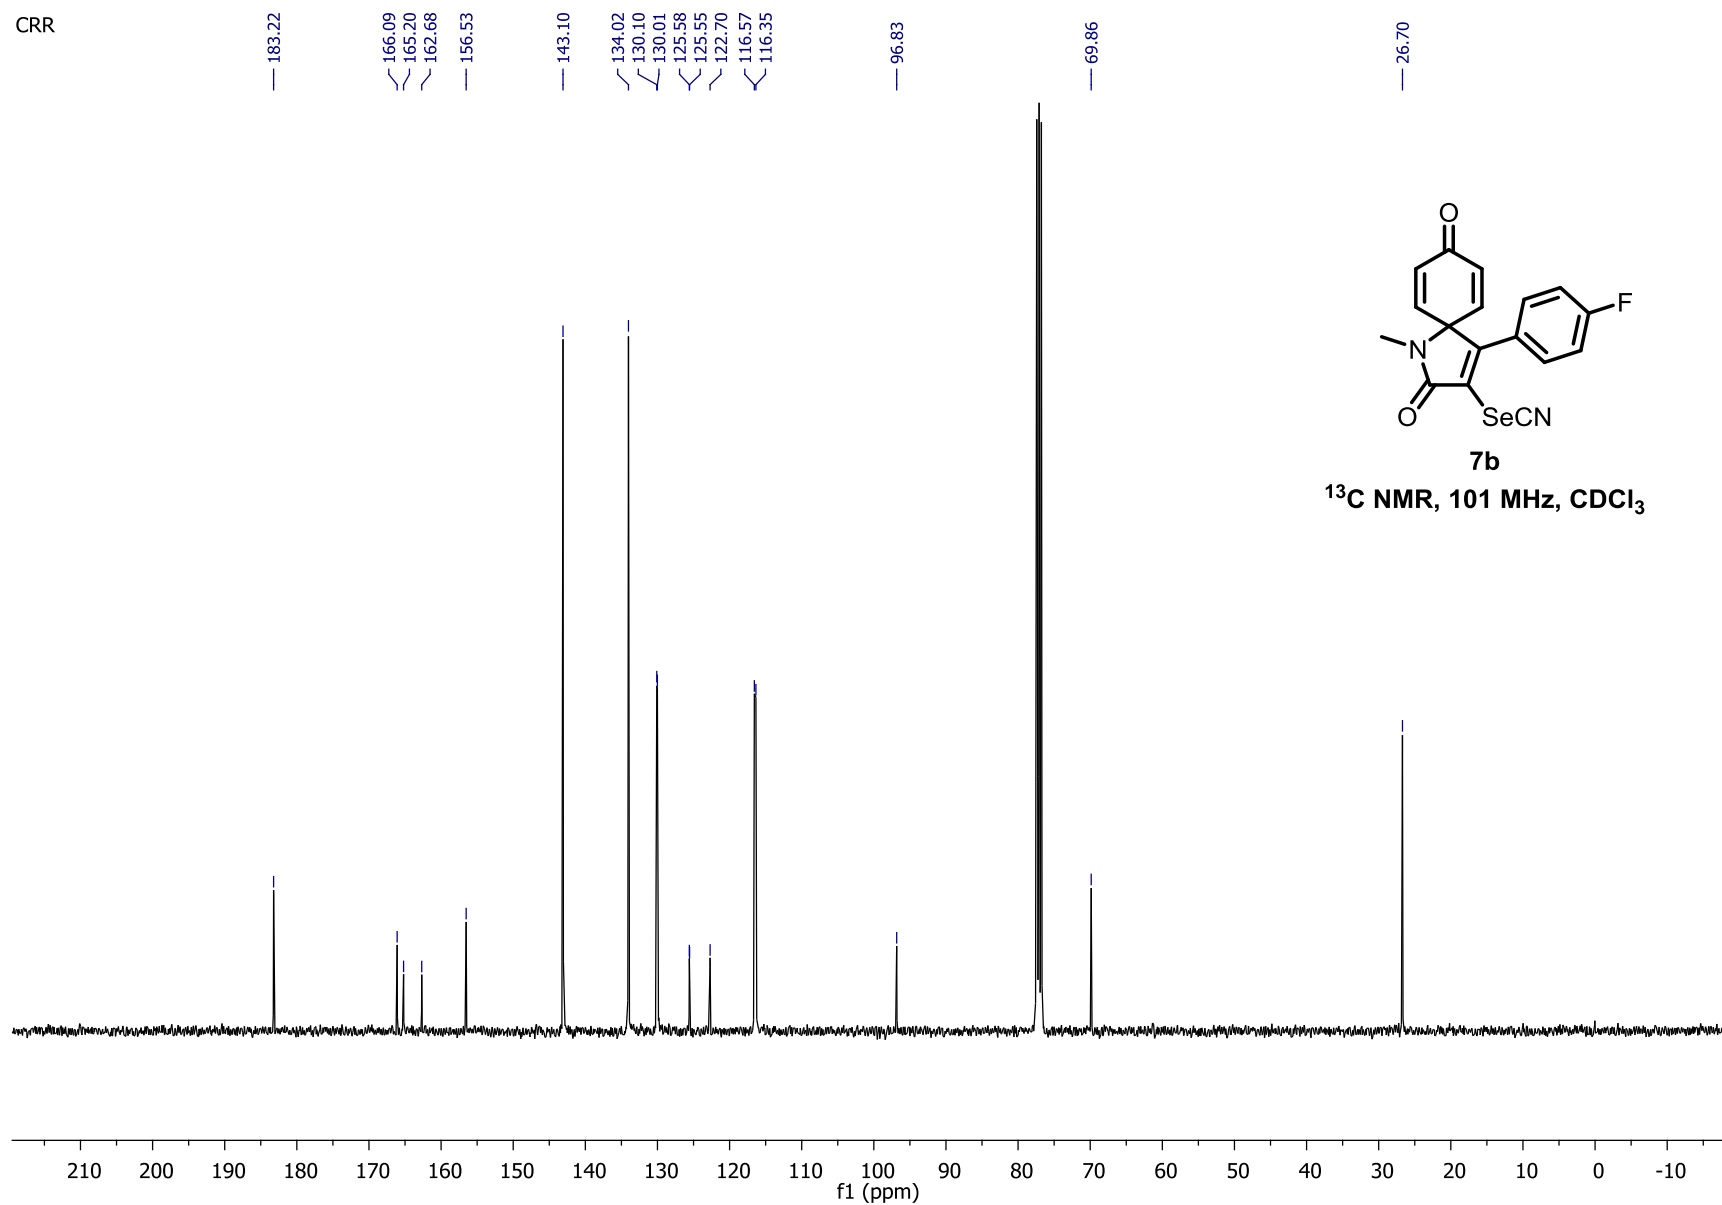



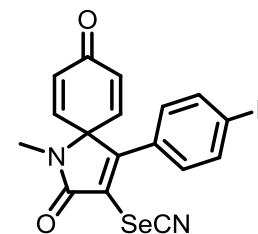

**7b**

<sup>19</sup>F NMR, 377 MHz, CDCl<sub>3</sub>

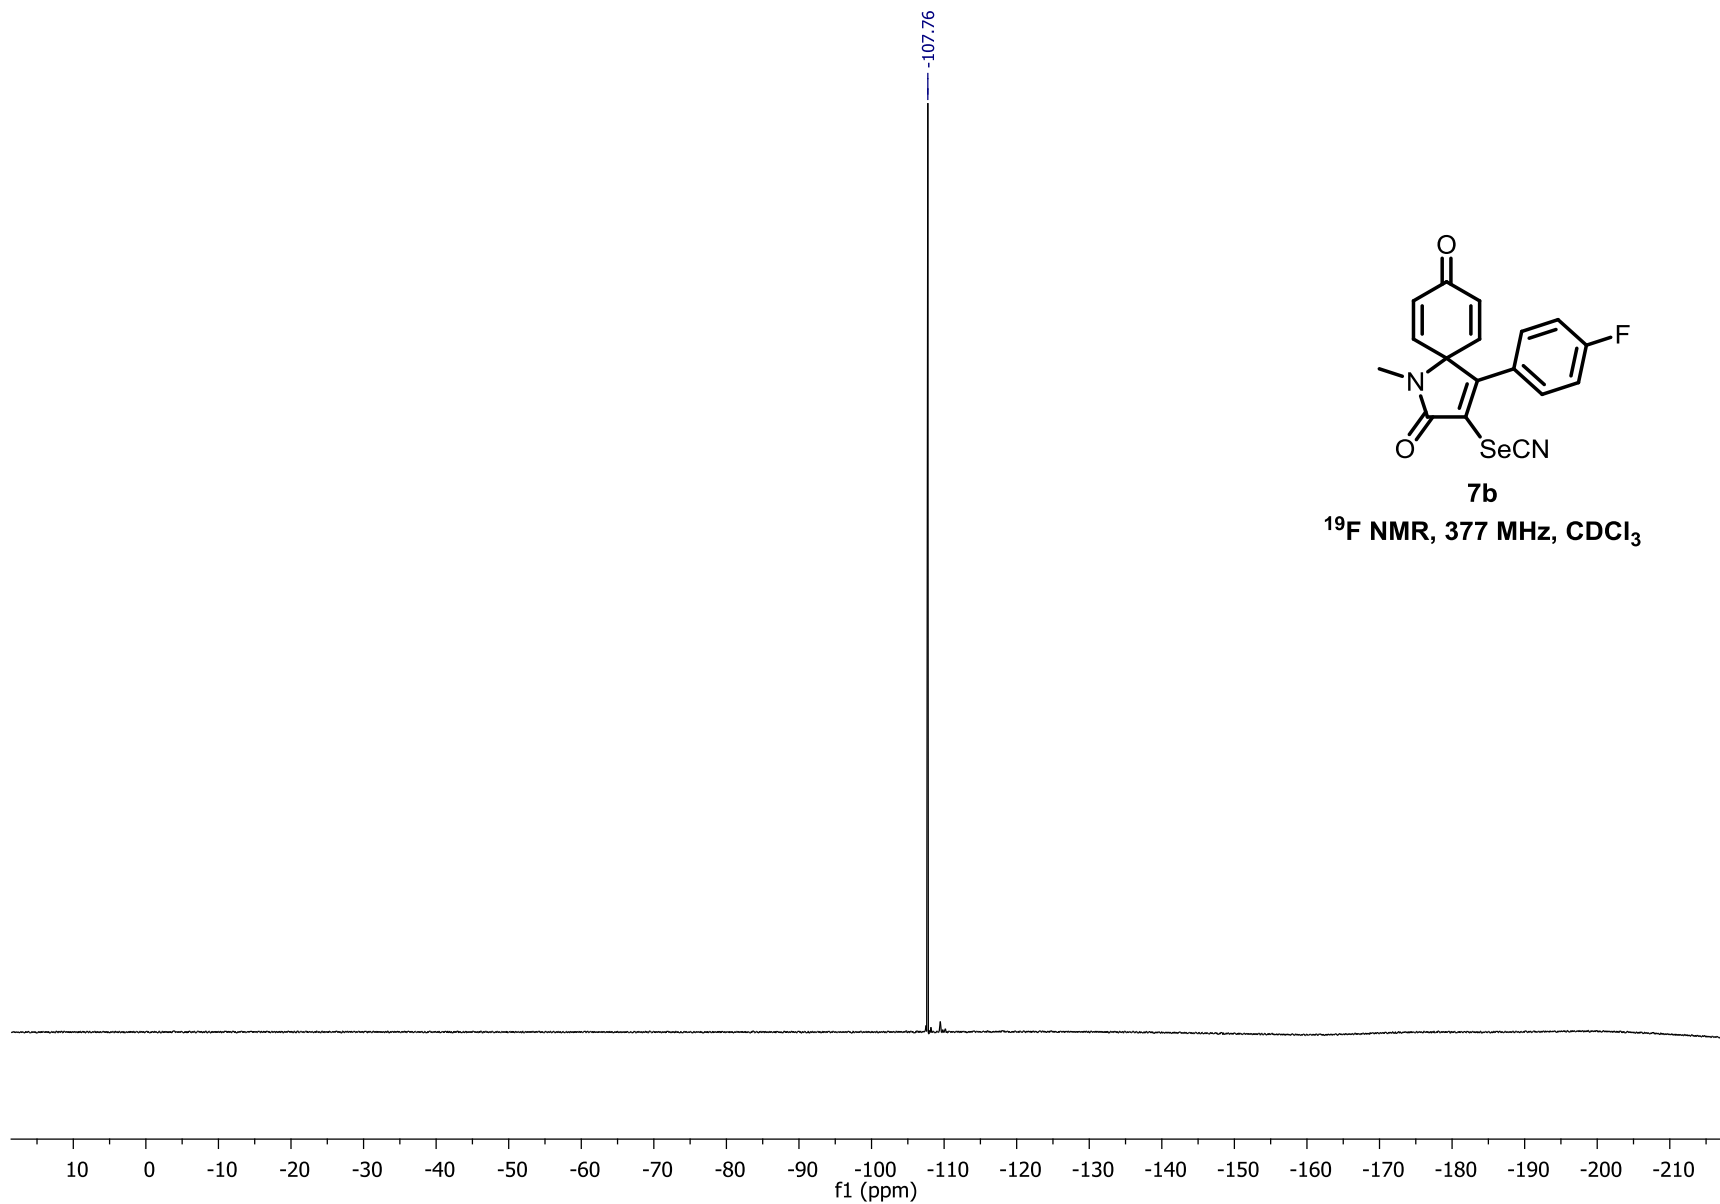

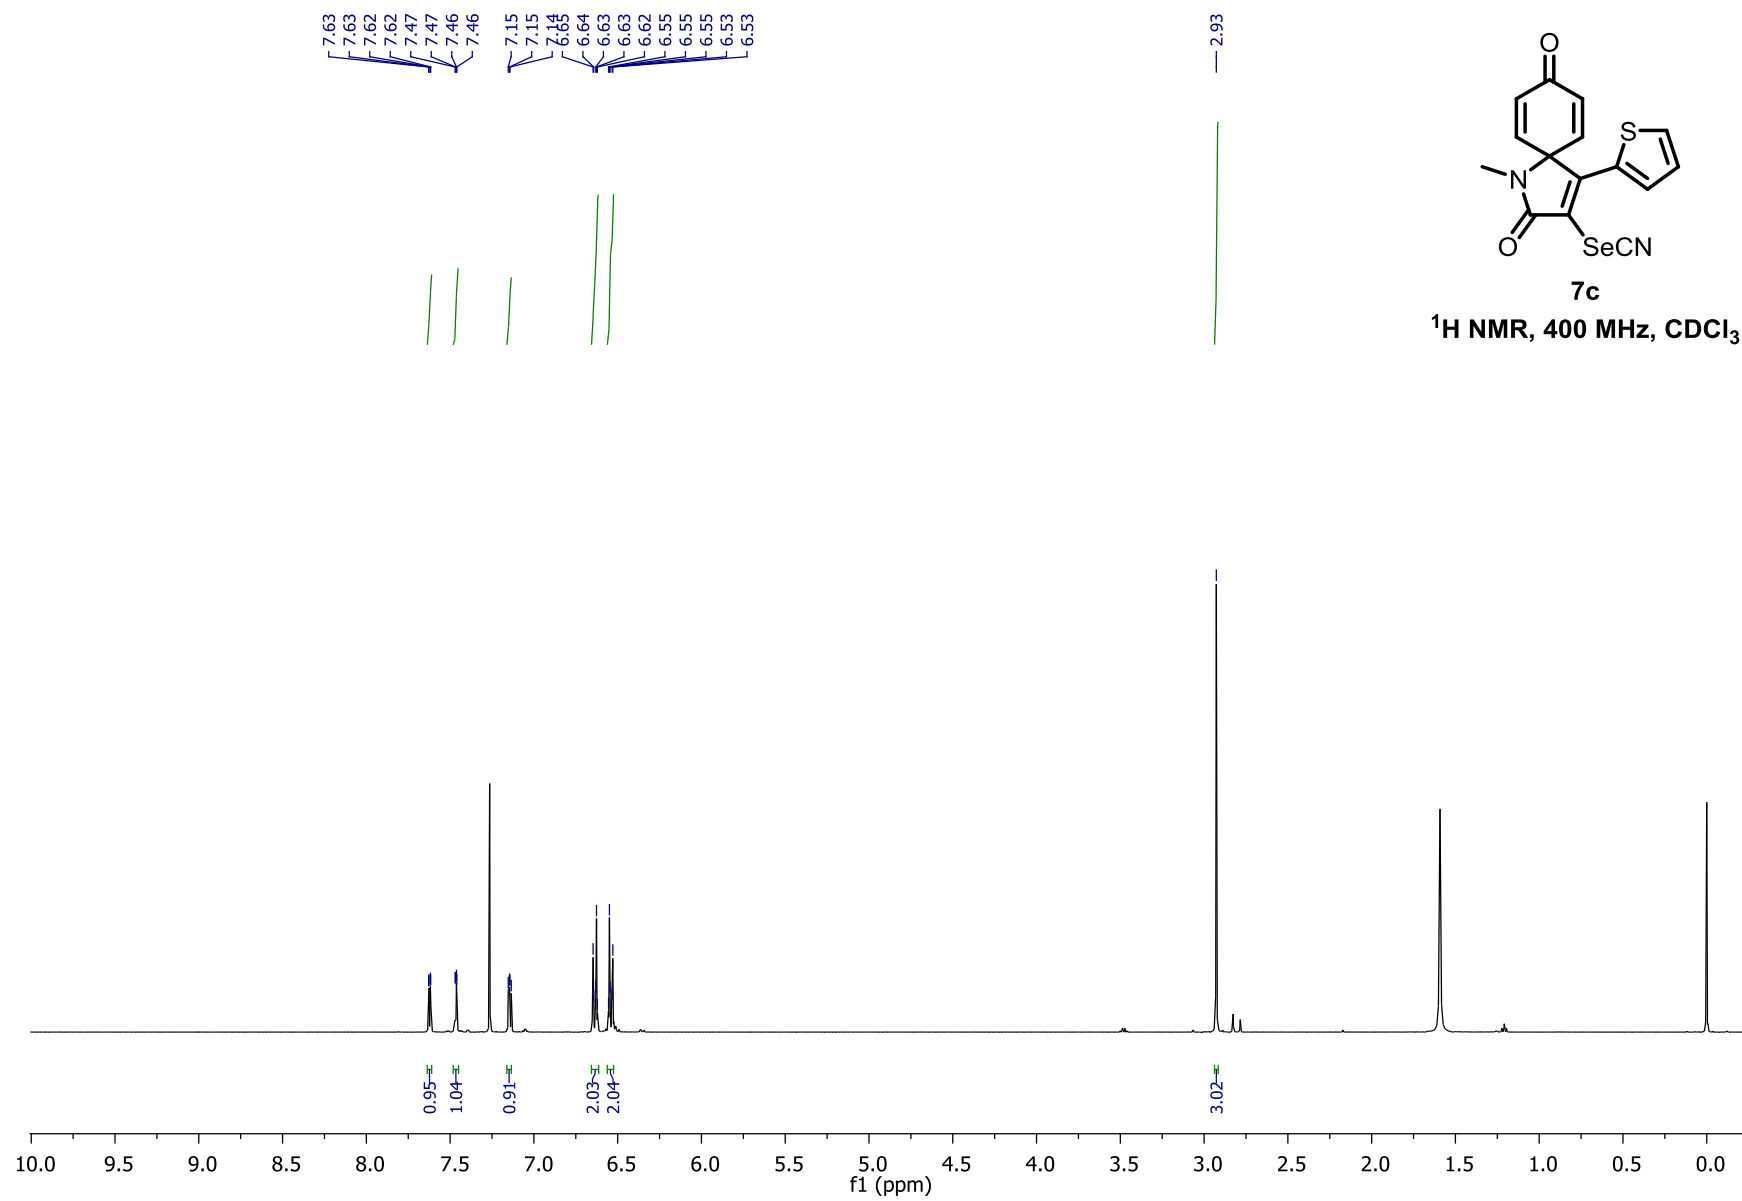

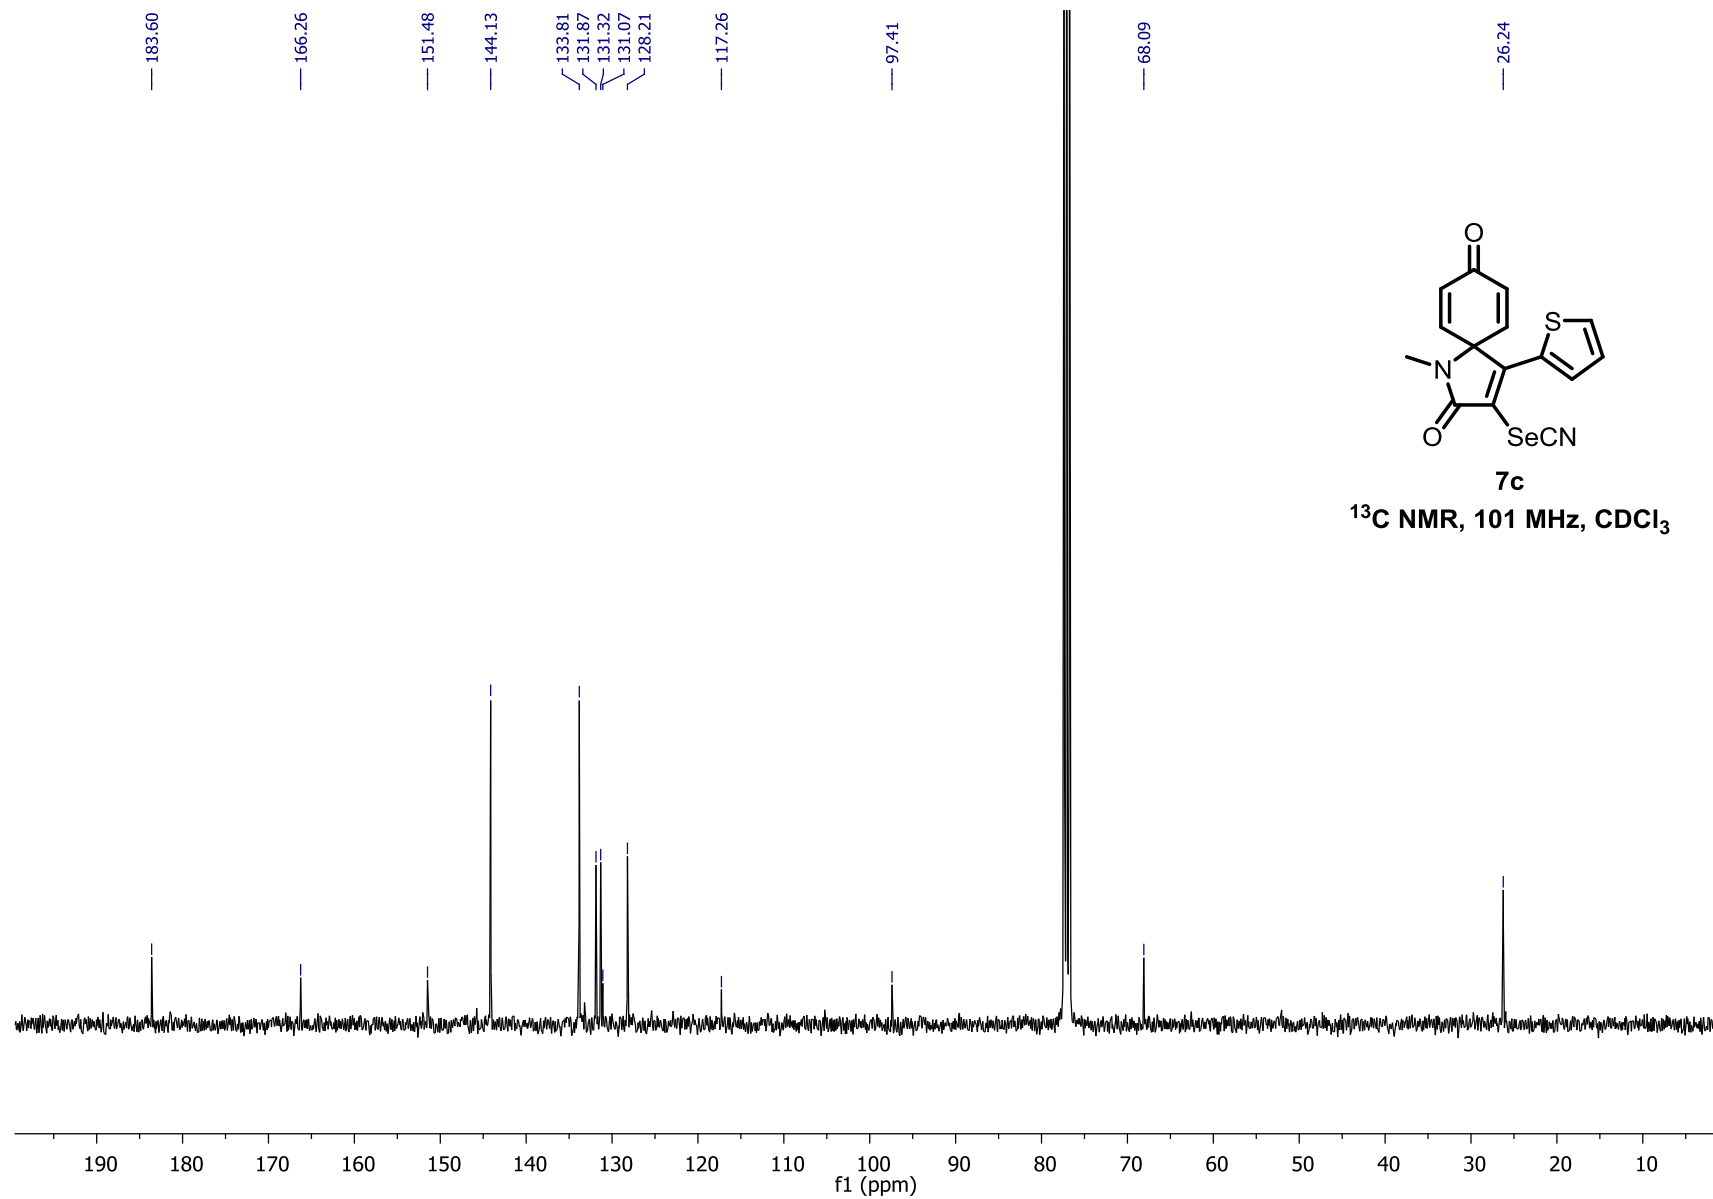

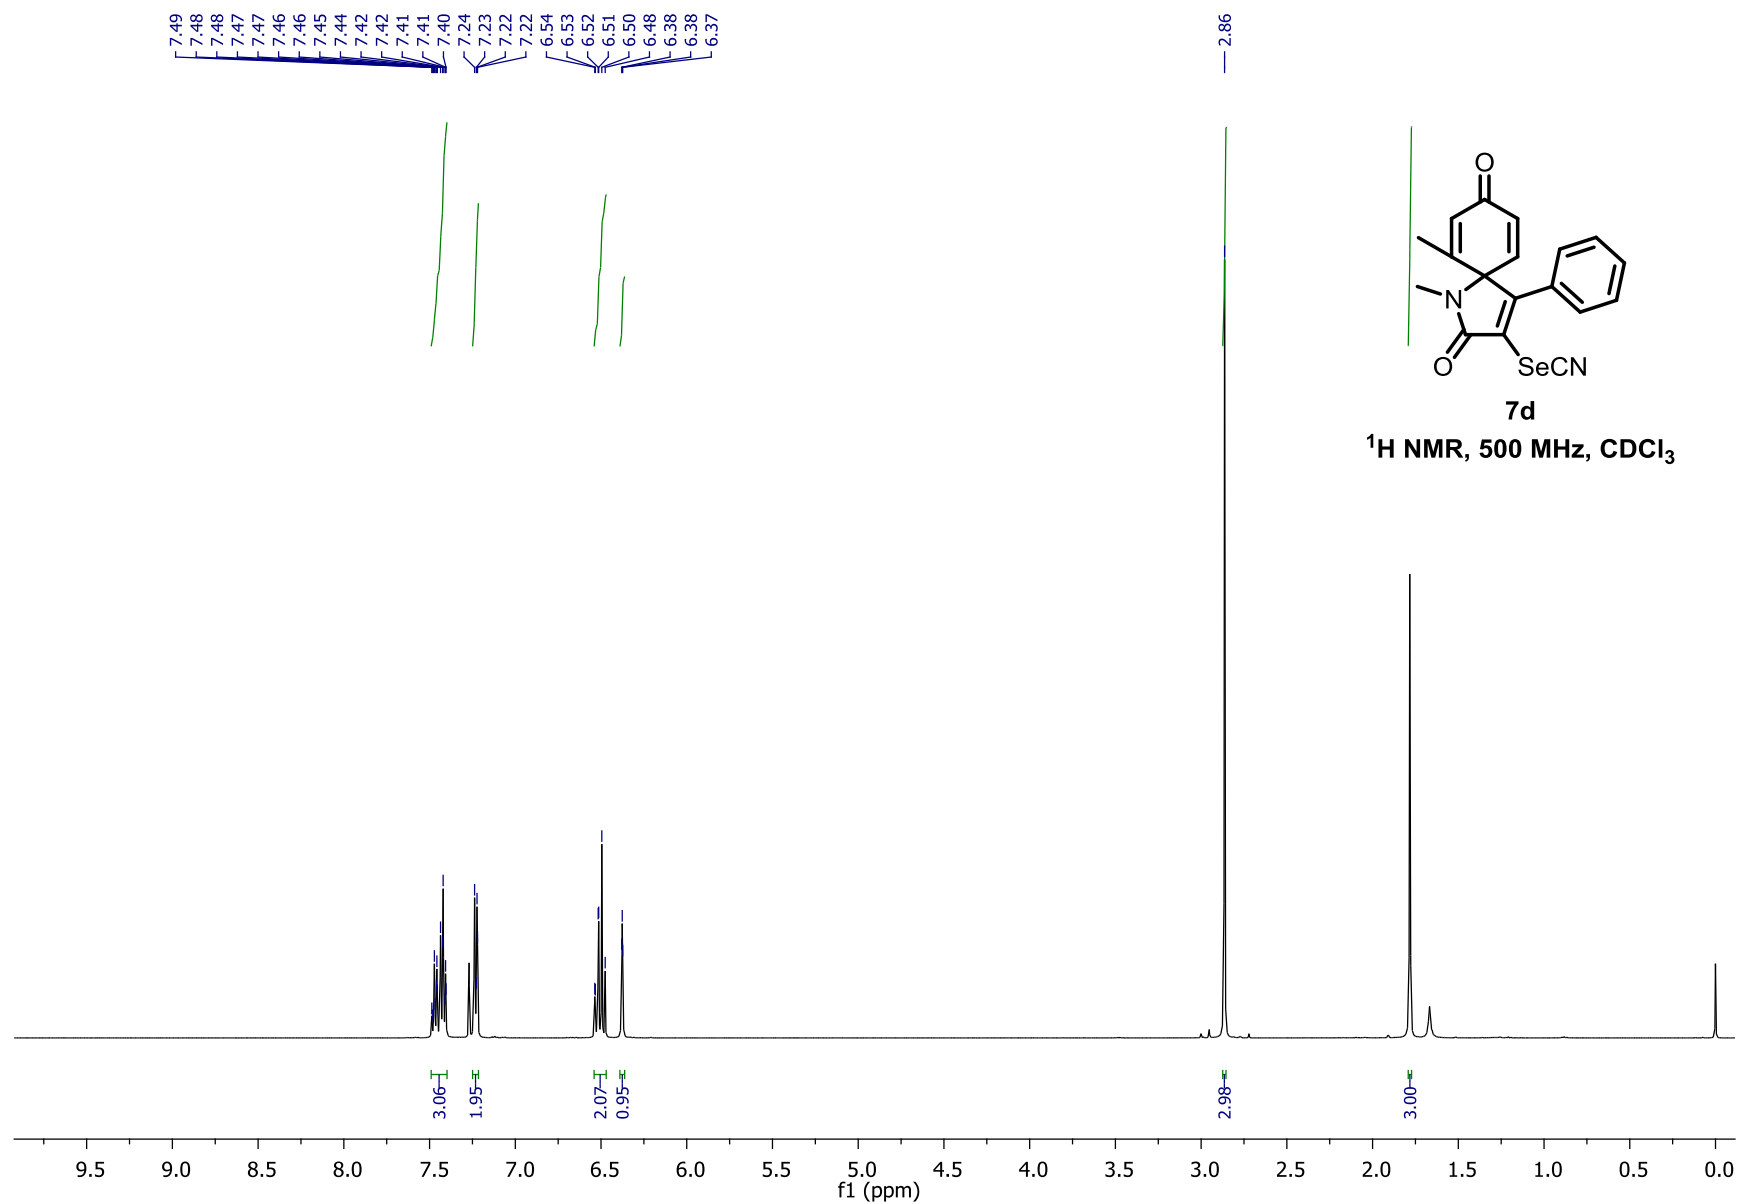

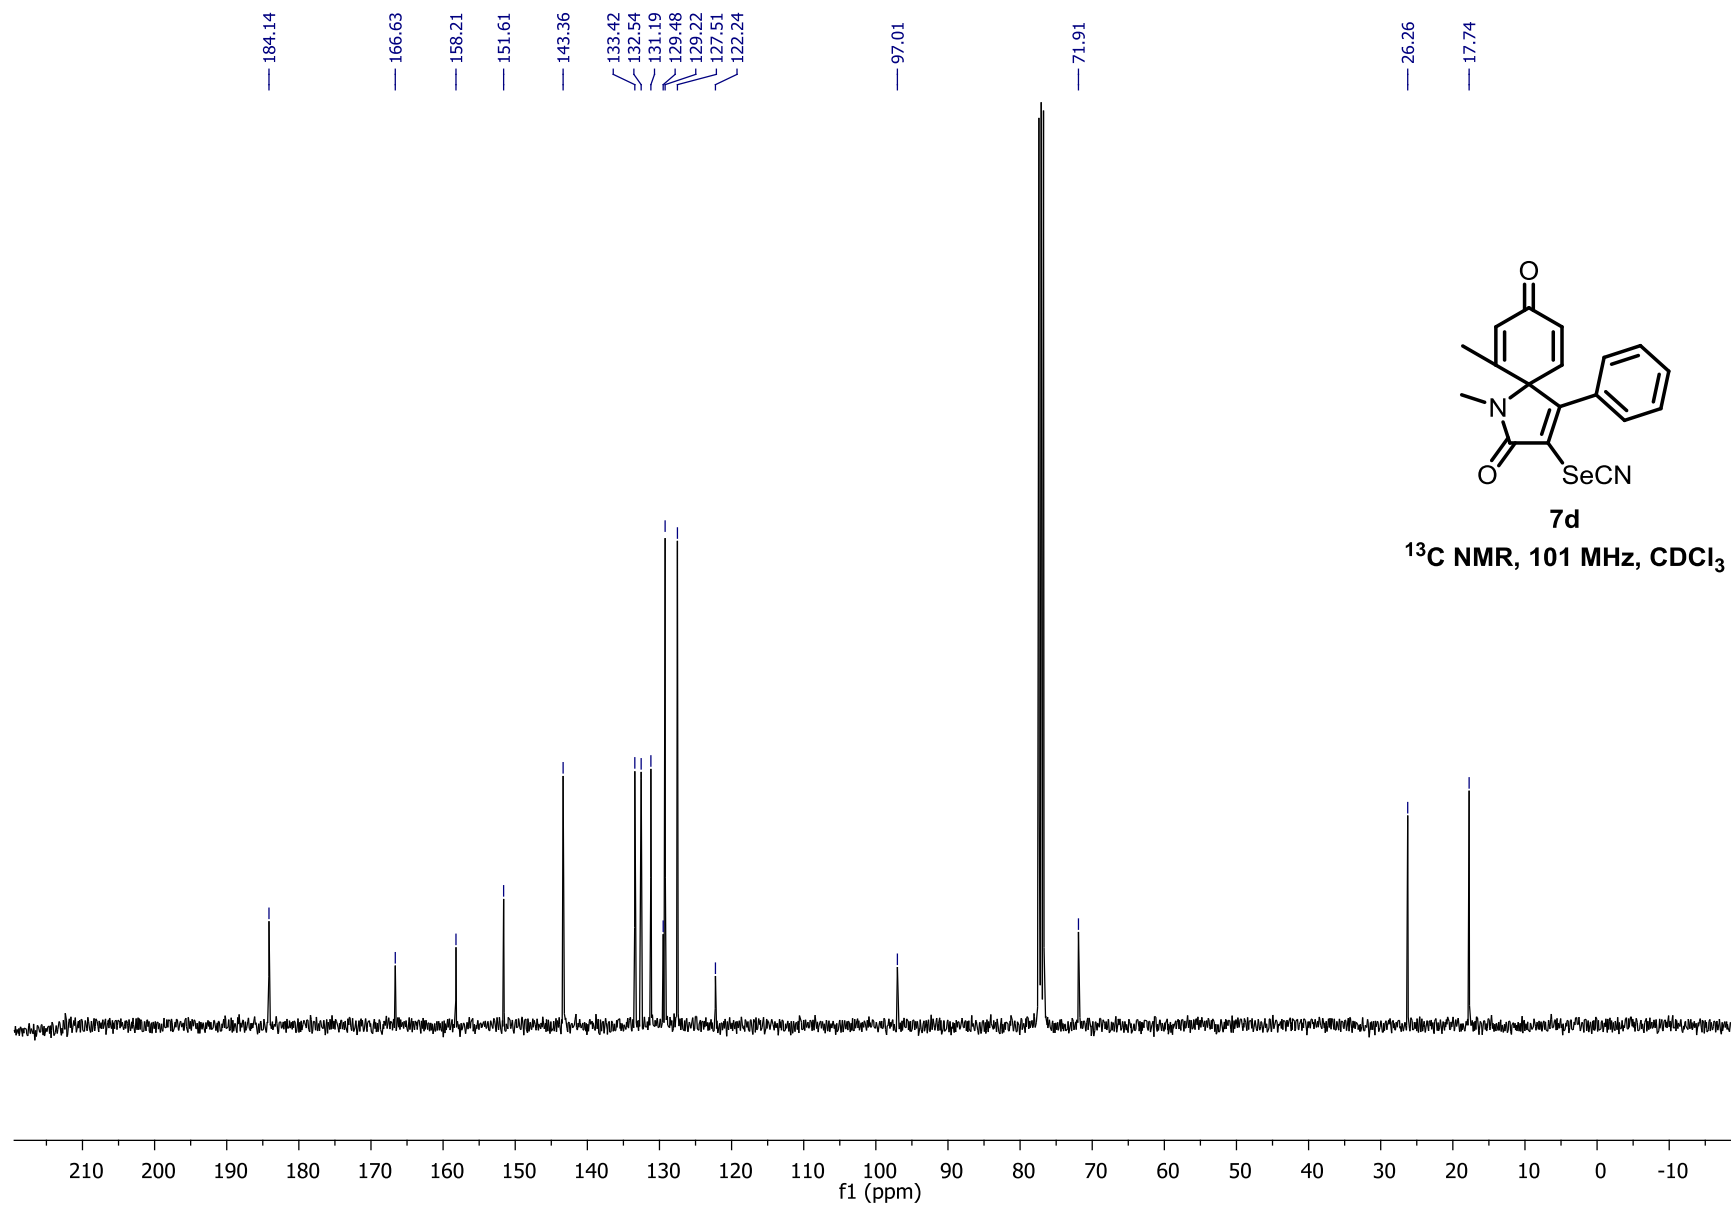

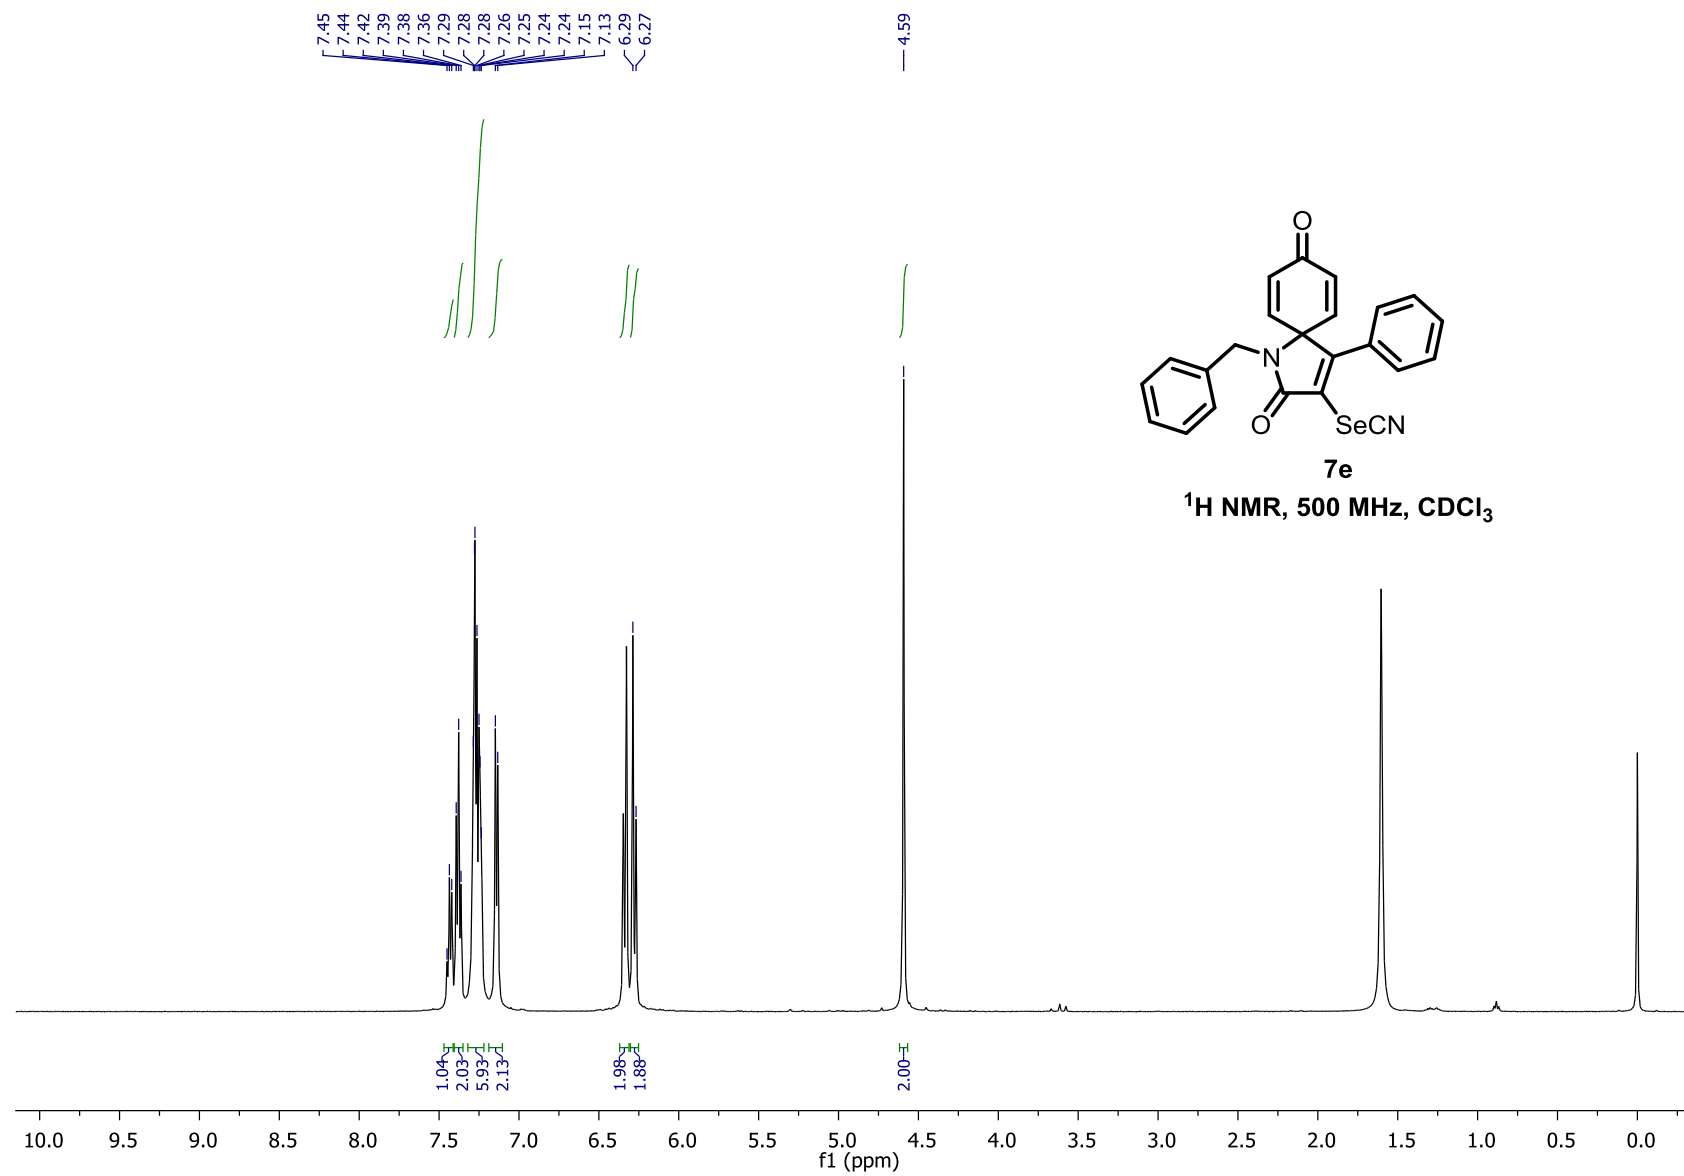

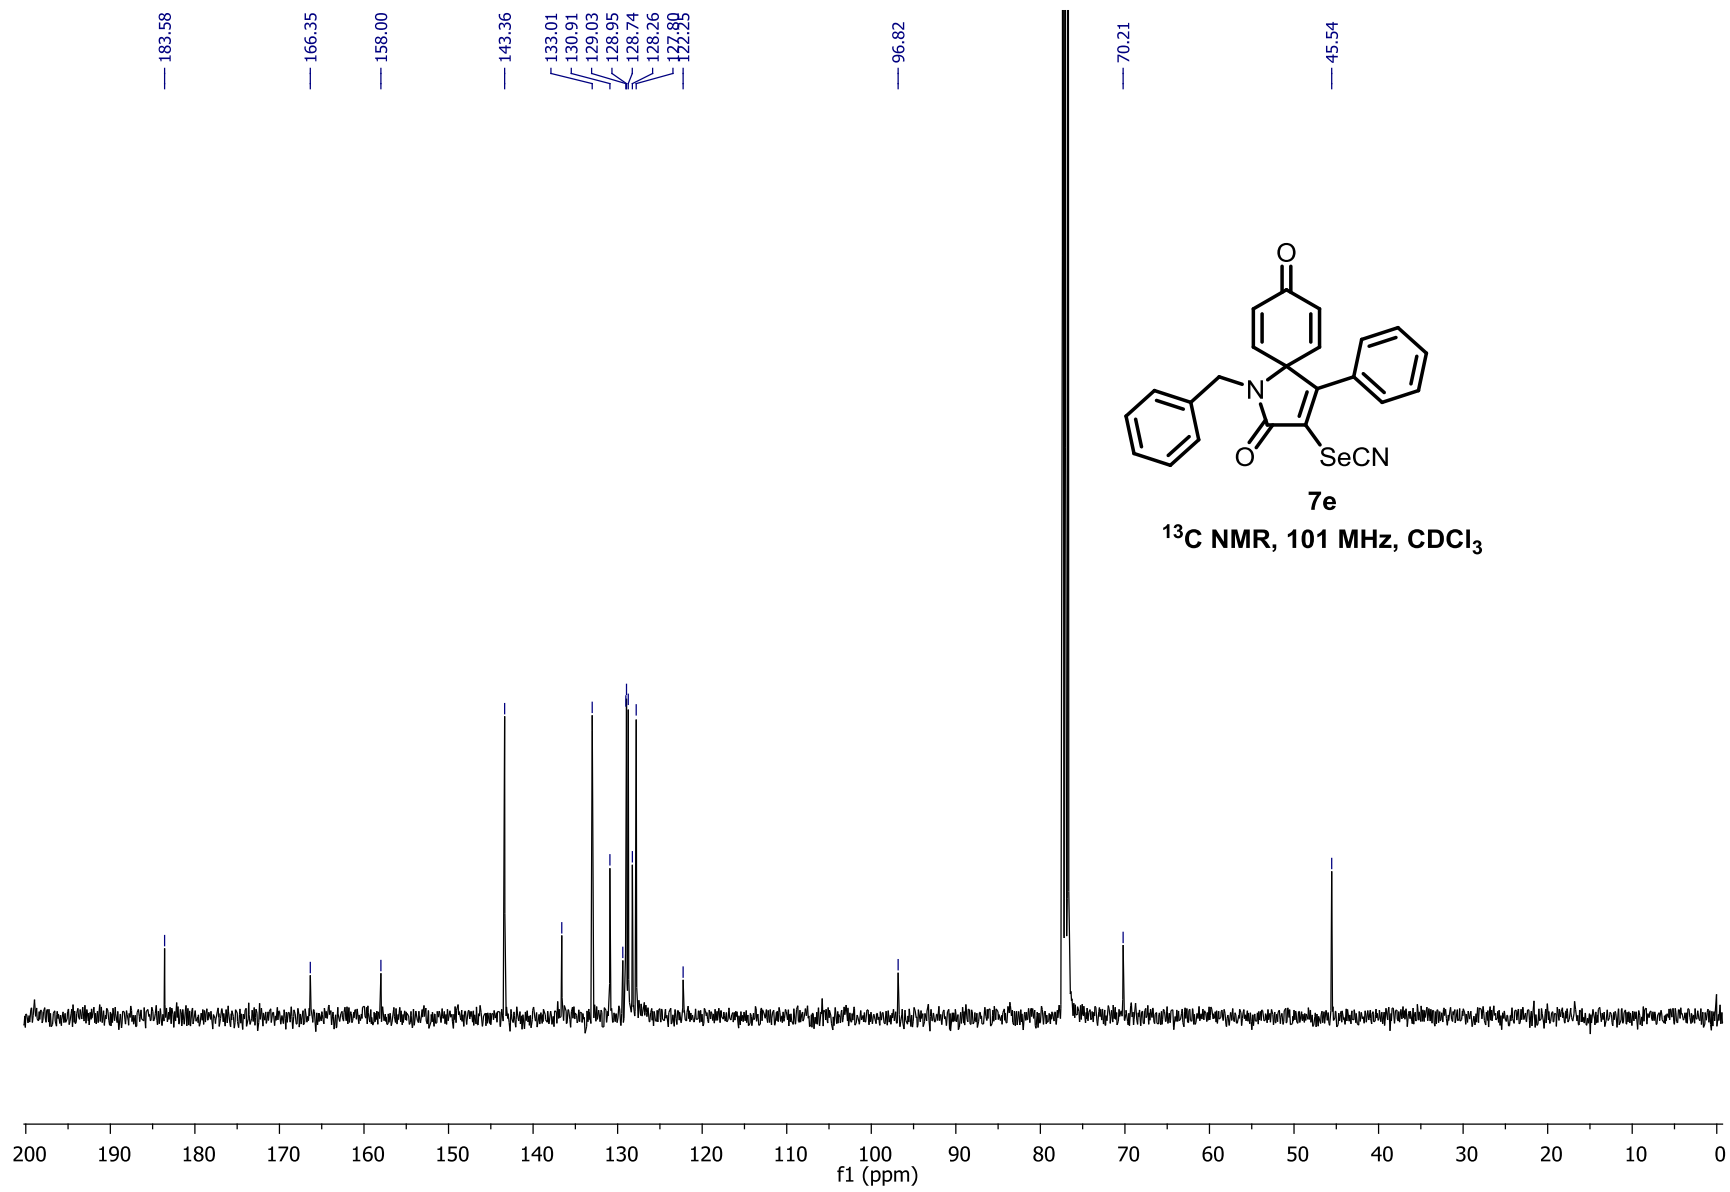

CRR

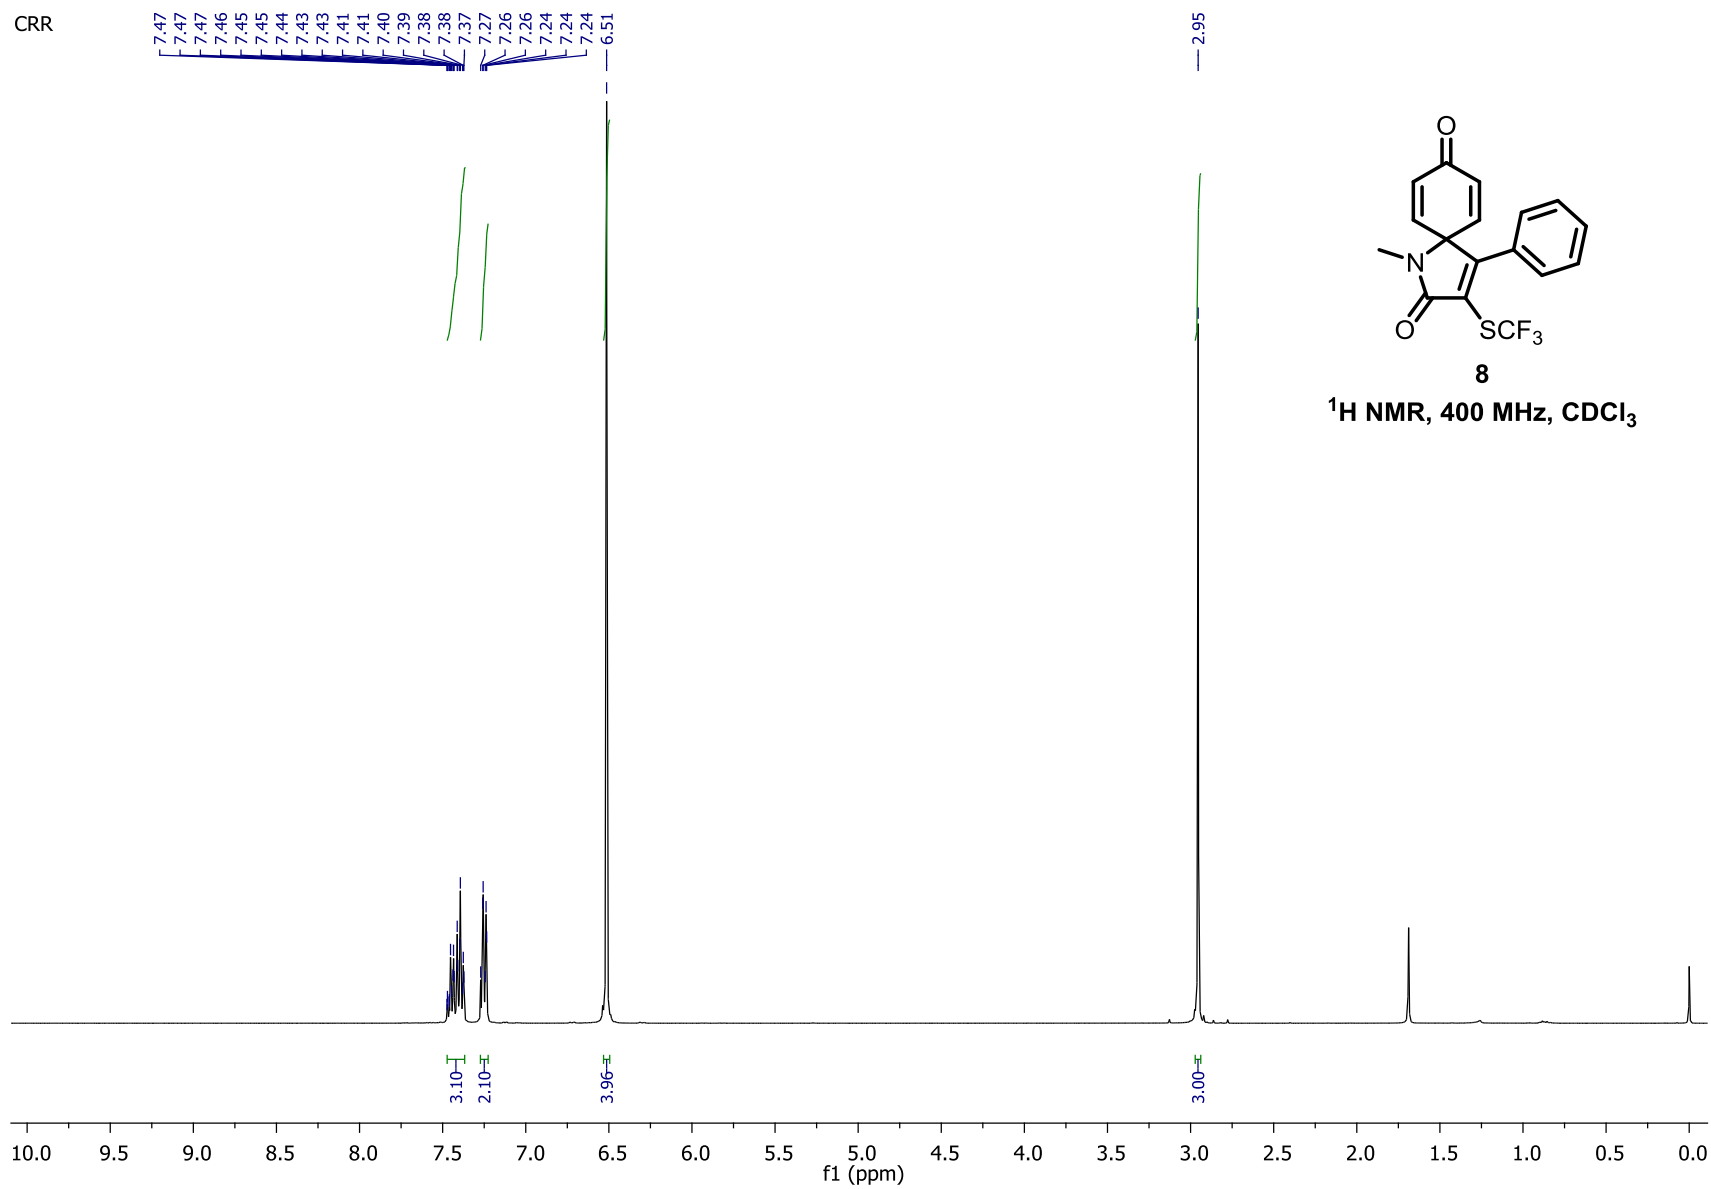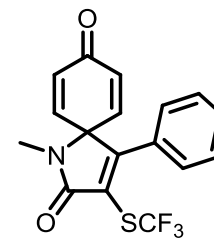

**8**

<sup>1</sup>H NMR, 400 MHz, CDCl<sub>3</sub>



CRR

— 183.39

— 166.74  
— 165.12

— 143.35

— 133.86  
— 130.70  
— 129.86  
— 129.66  
— 128.68  
— 128.03  
— 126.77  
— 123.90

— 68.42

— 26.65

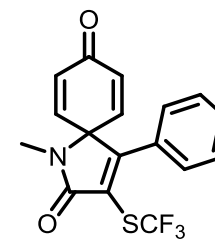

8

<sup>13</sup>C NMR, 101 MHz, CDCl<sub>3</sub>

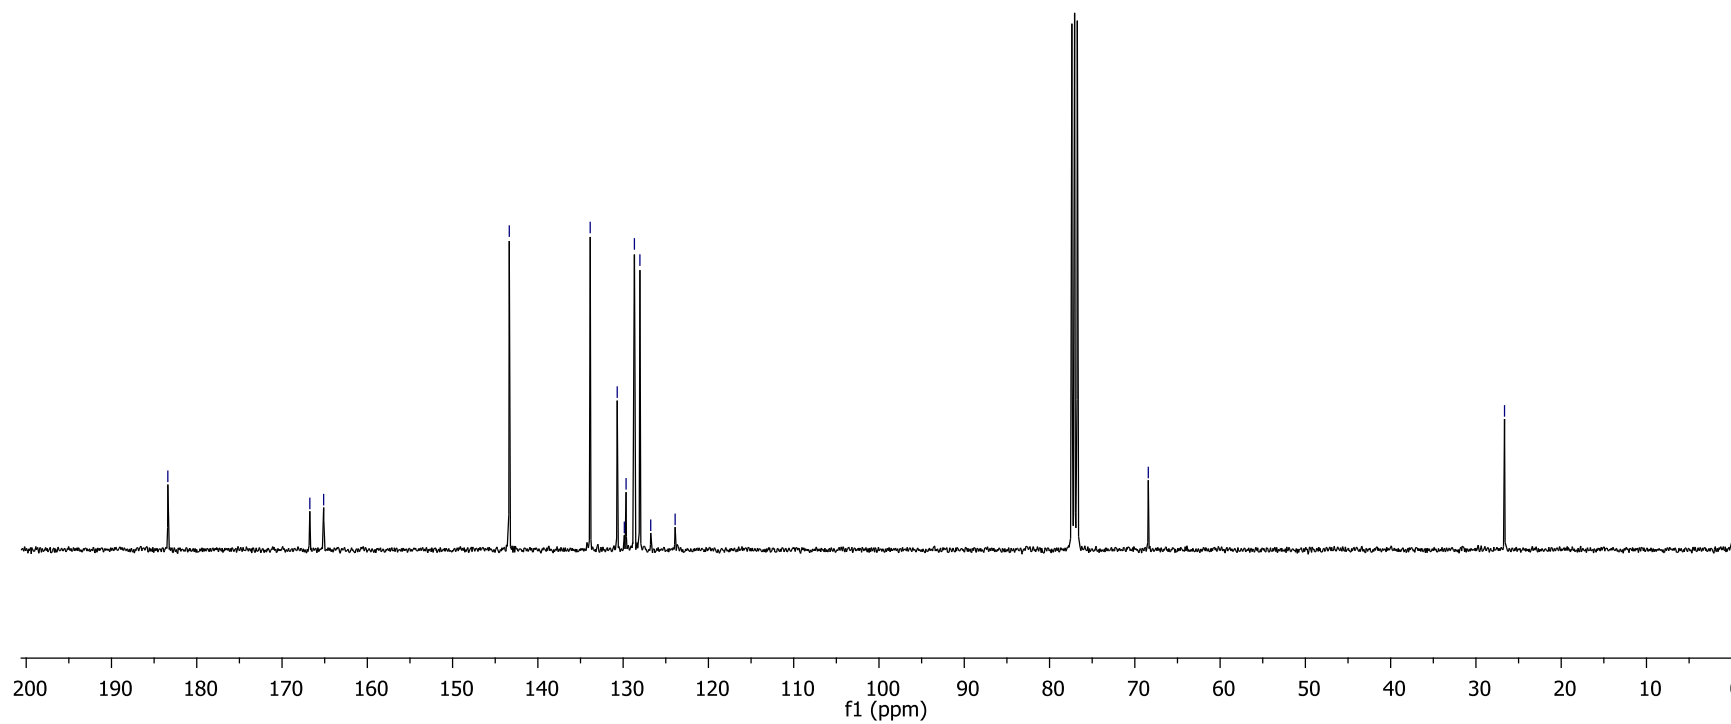

S81

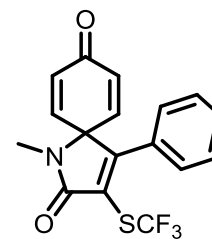

8

$^{19}\text{F}$  NMR, 376 MHz,  $\text{CDCl}_3$

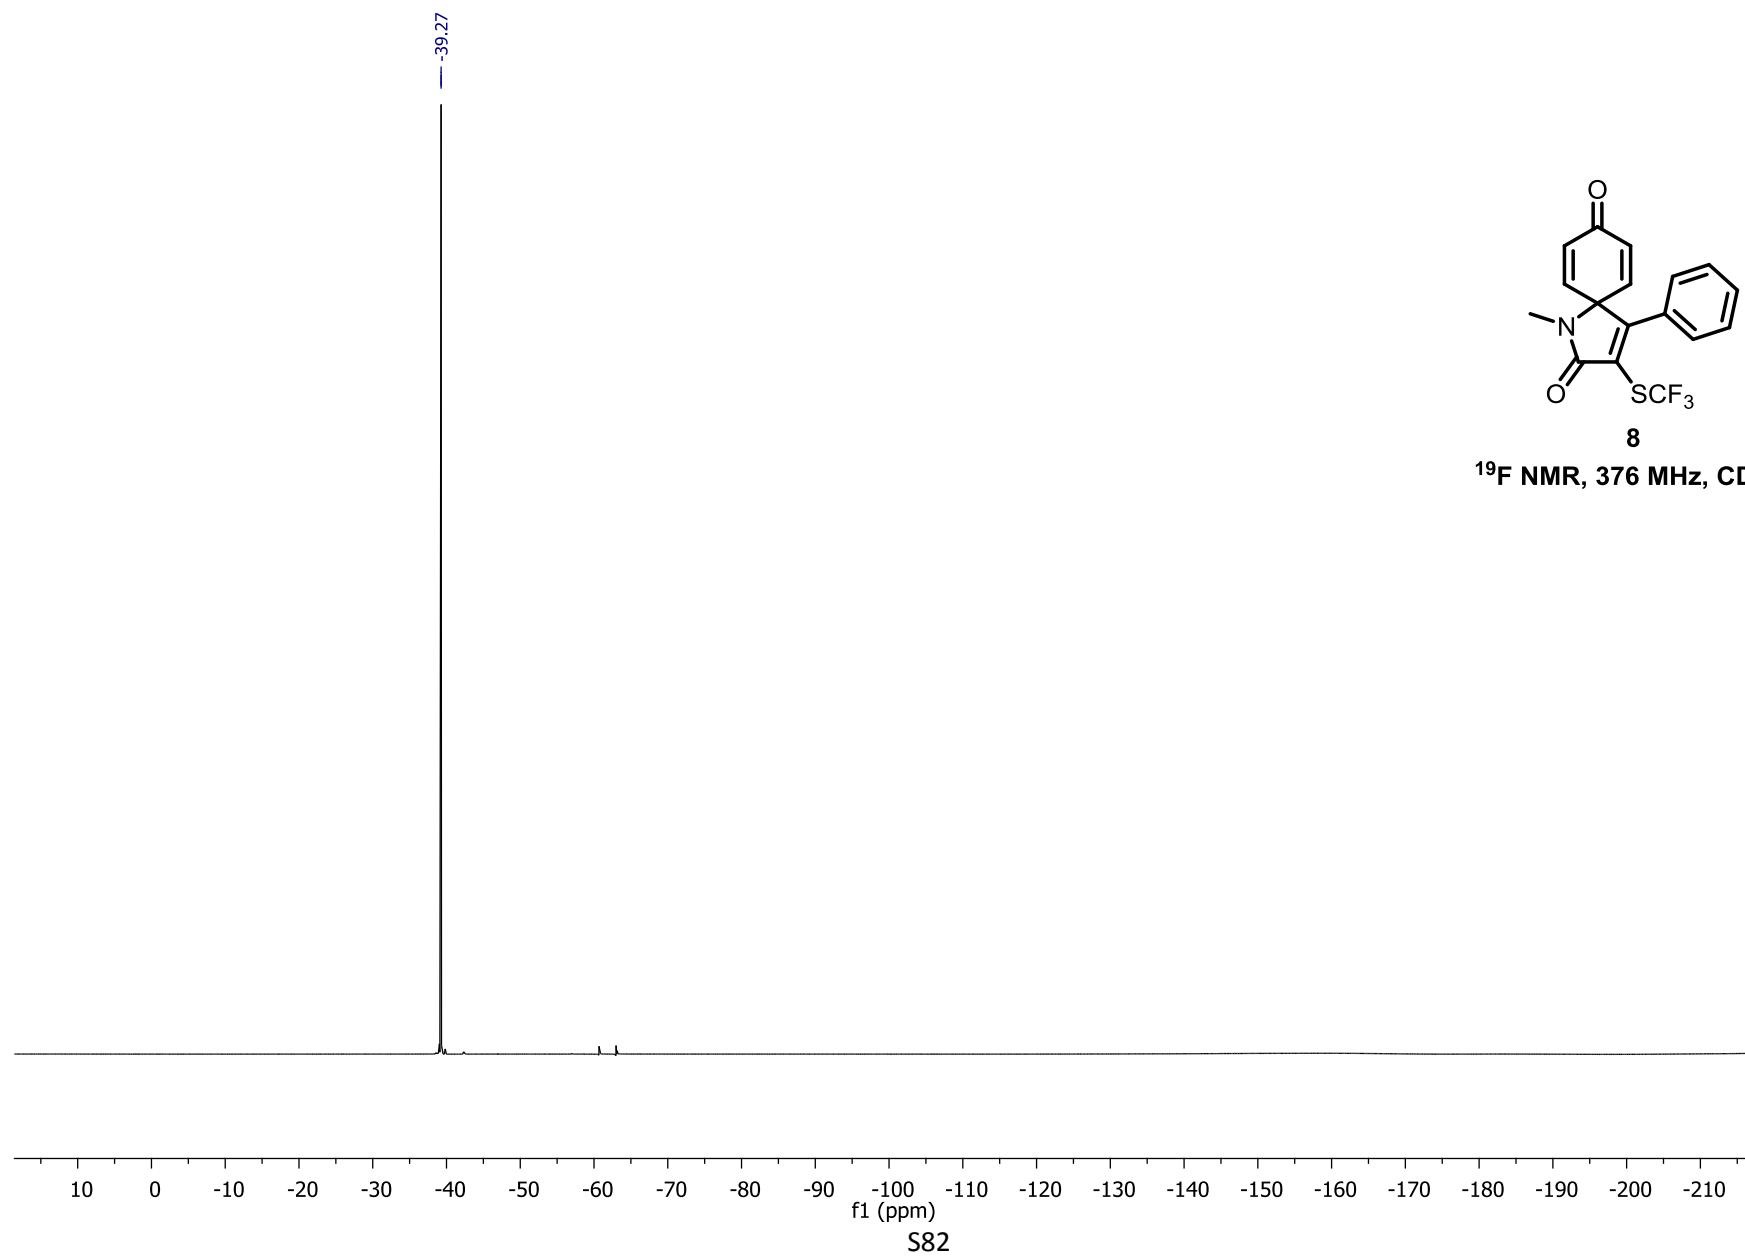

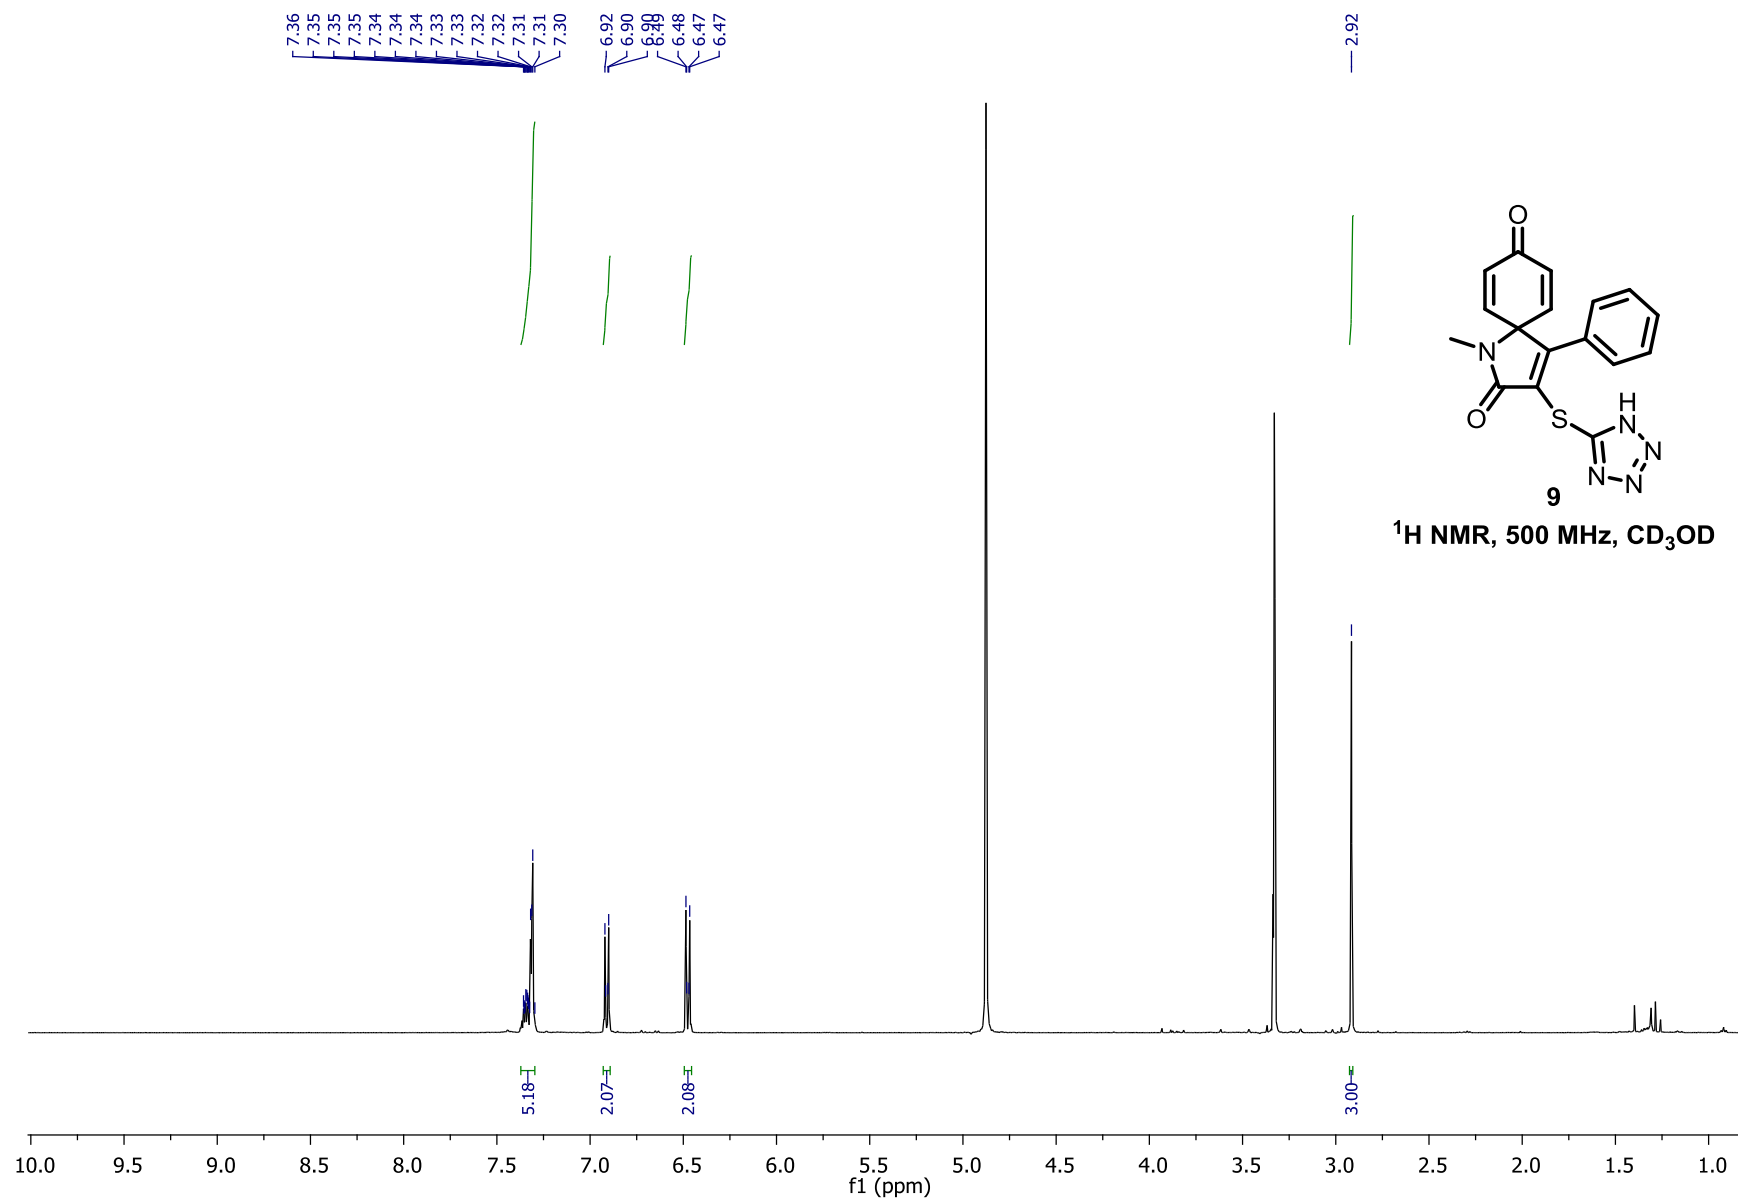

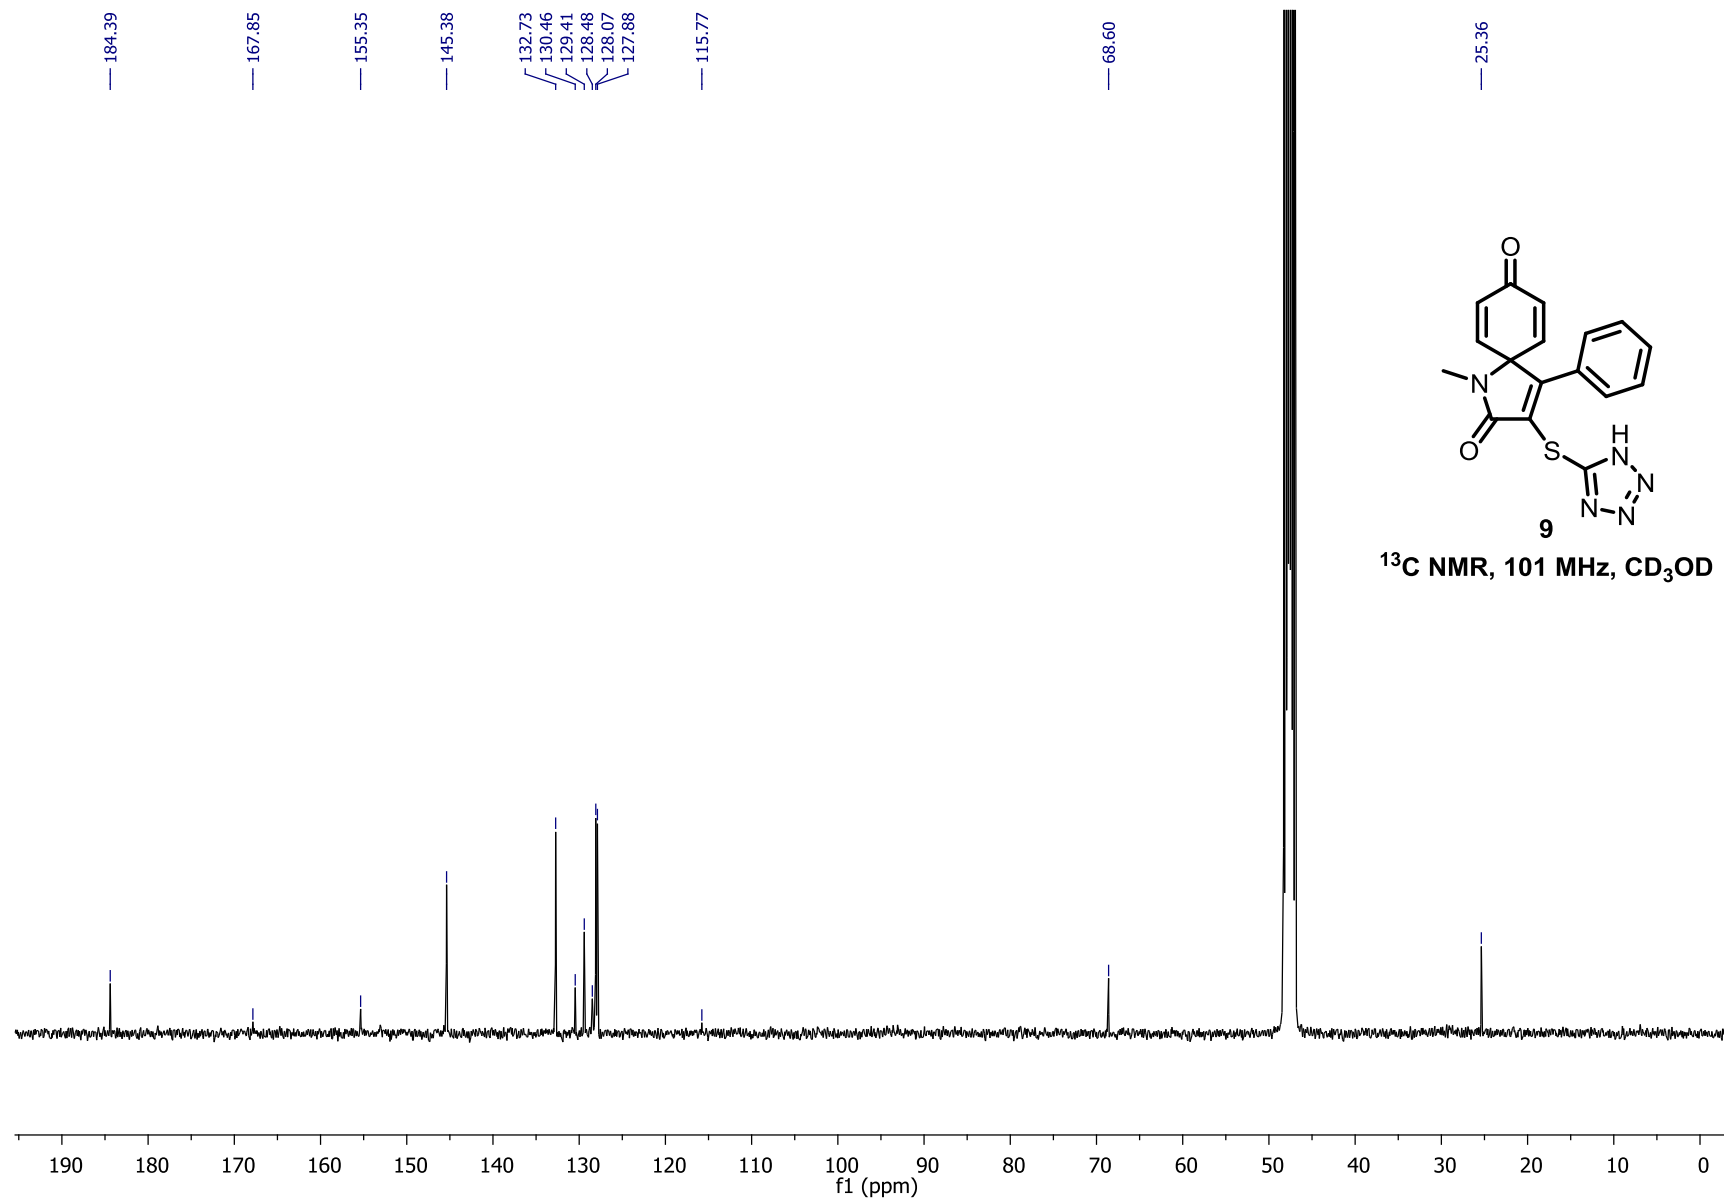

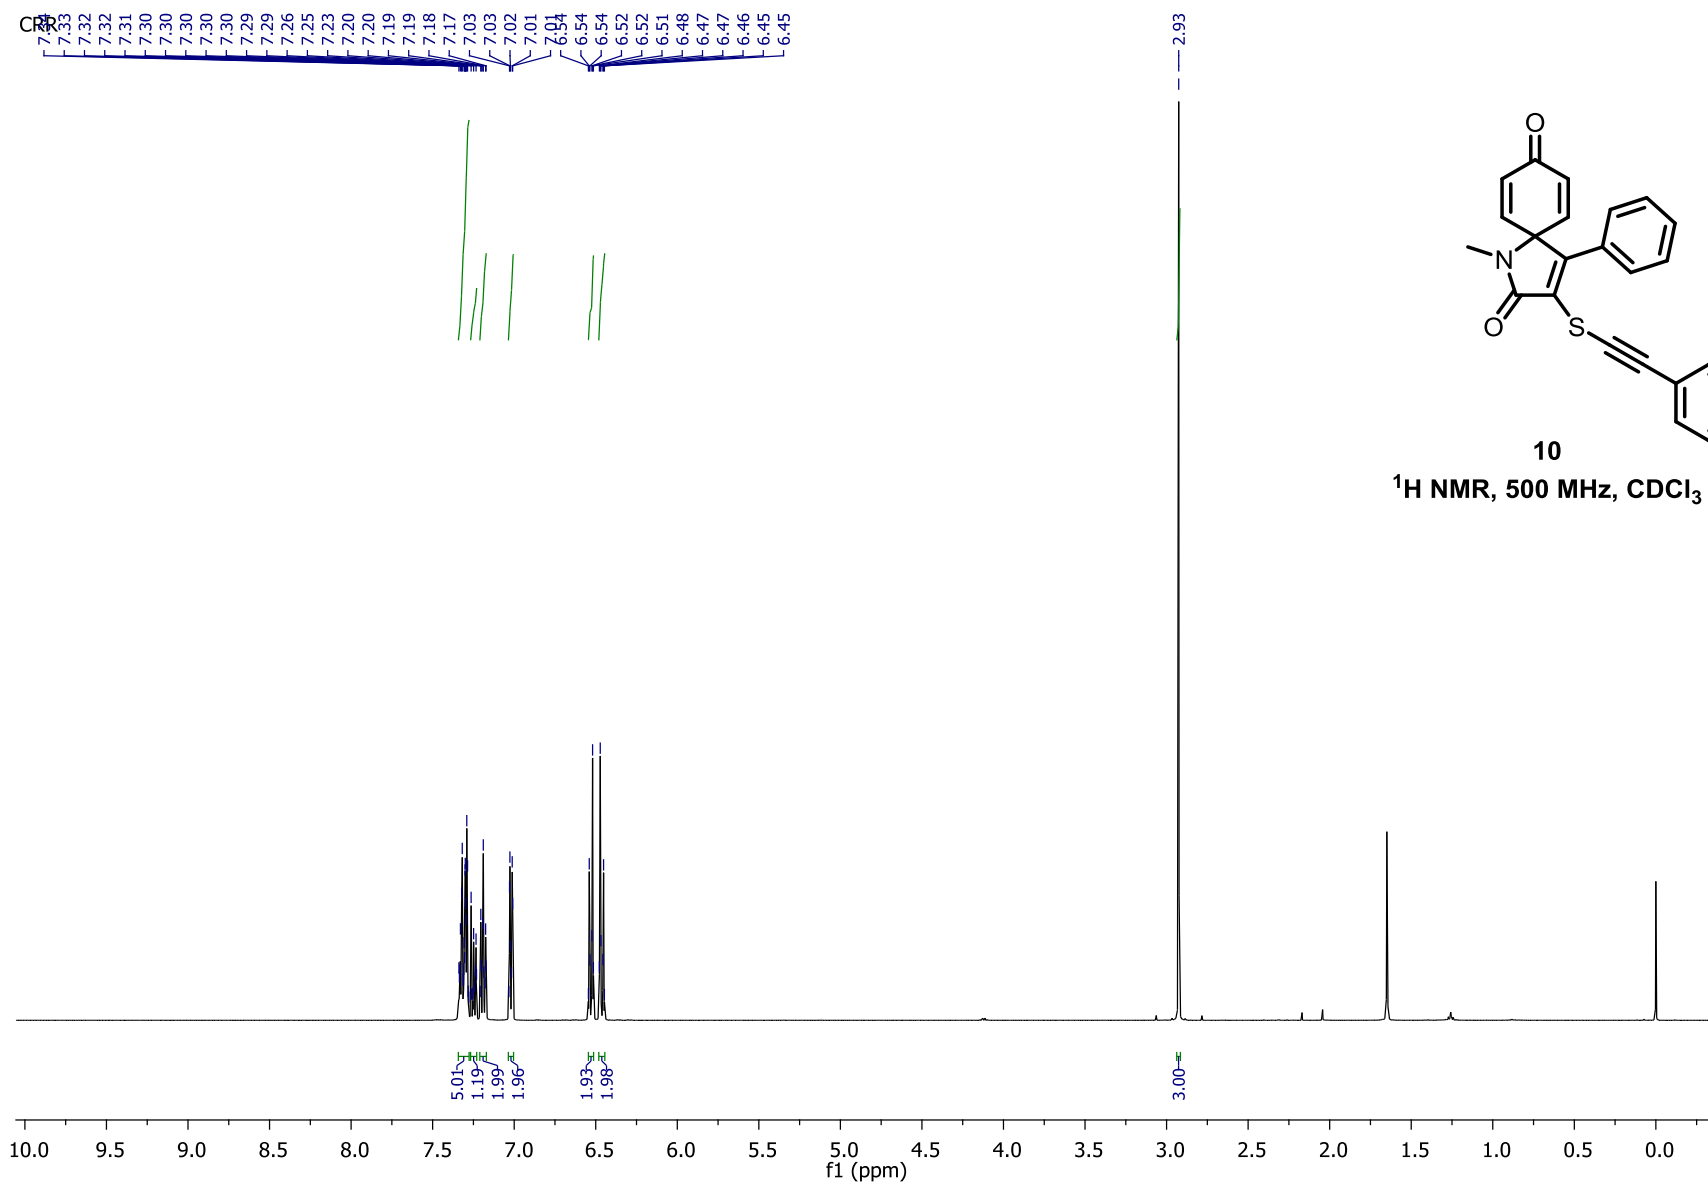

**10**  
**<sup>1</sup>H NMR, 500 MHz, CDCl<sub>3</sub>**

4204

— 183.90

— 166.88

— 148.97

— 144.78

— 133.35

— 131.65

— 129.80

— 128.65

— 128.44

— 128.24

— 128.01

— 97.74

— 71.76

— 68.40

— 26.32

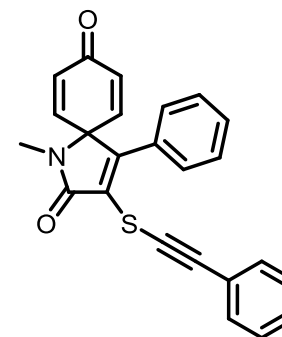

10

 $^{13}\text{C}$  NMR, 101 MHz,  $\text{CDCl}_3$ 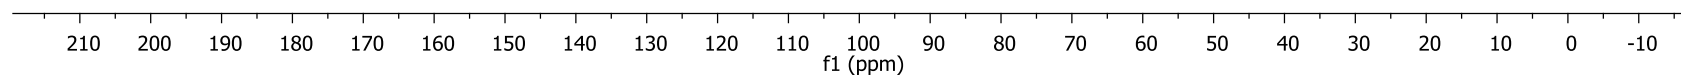

S86

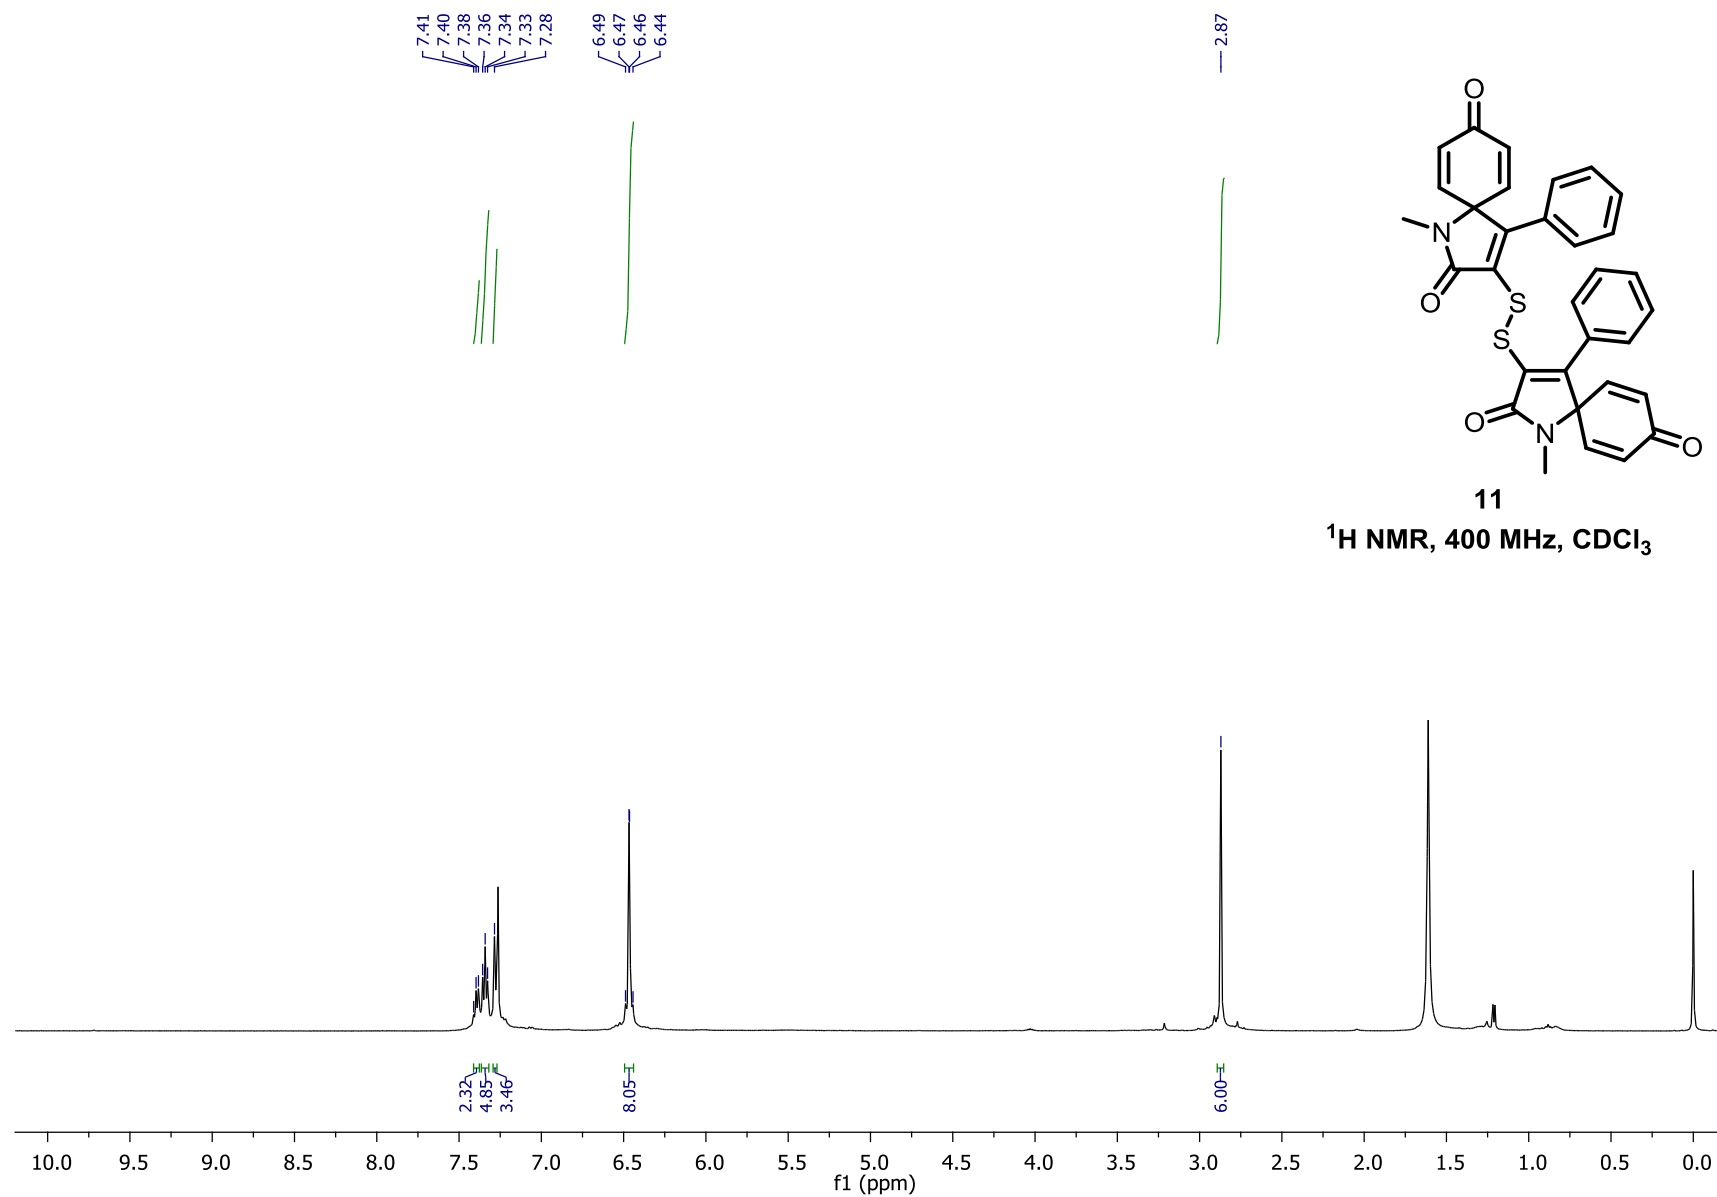

4277

— 183.95

— 167.66

— 157.28

— 144.71

133.84

133.21

130.78

130.16

128.59

128.45

— 67.68

— 26.23

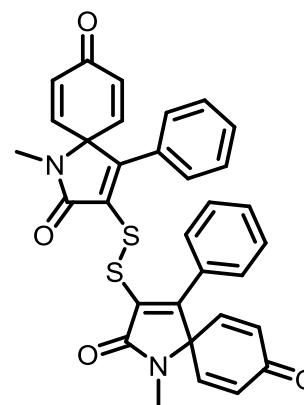

11

 $^{13}\text{C}$  NMR, 101 MHz,  $\text{CDCl}_3$ 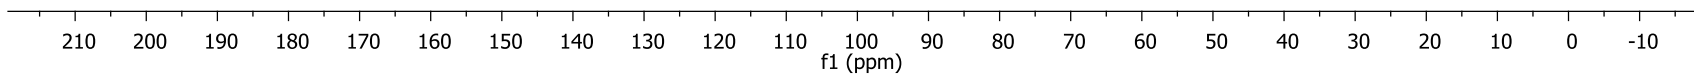



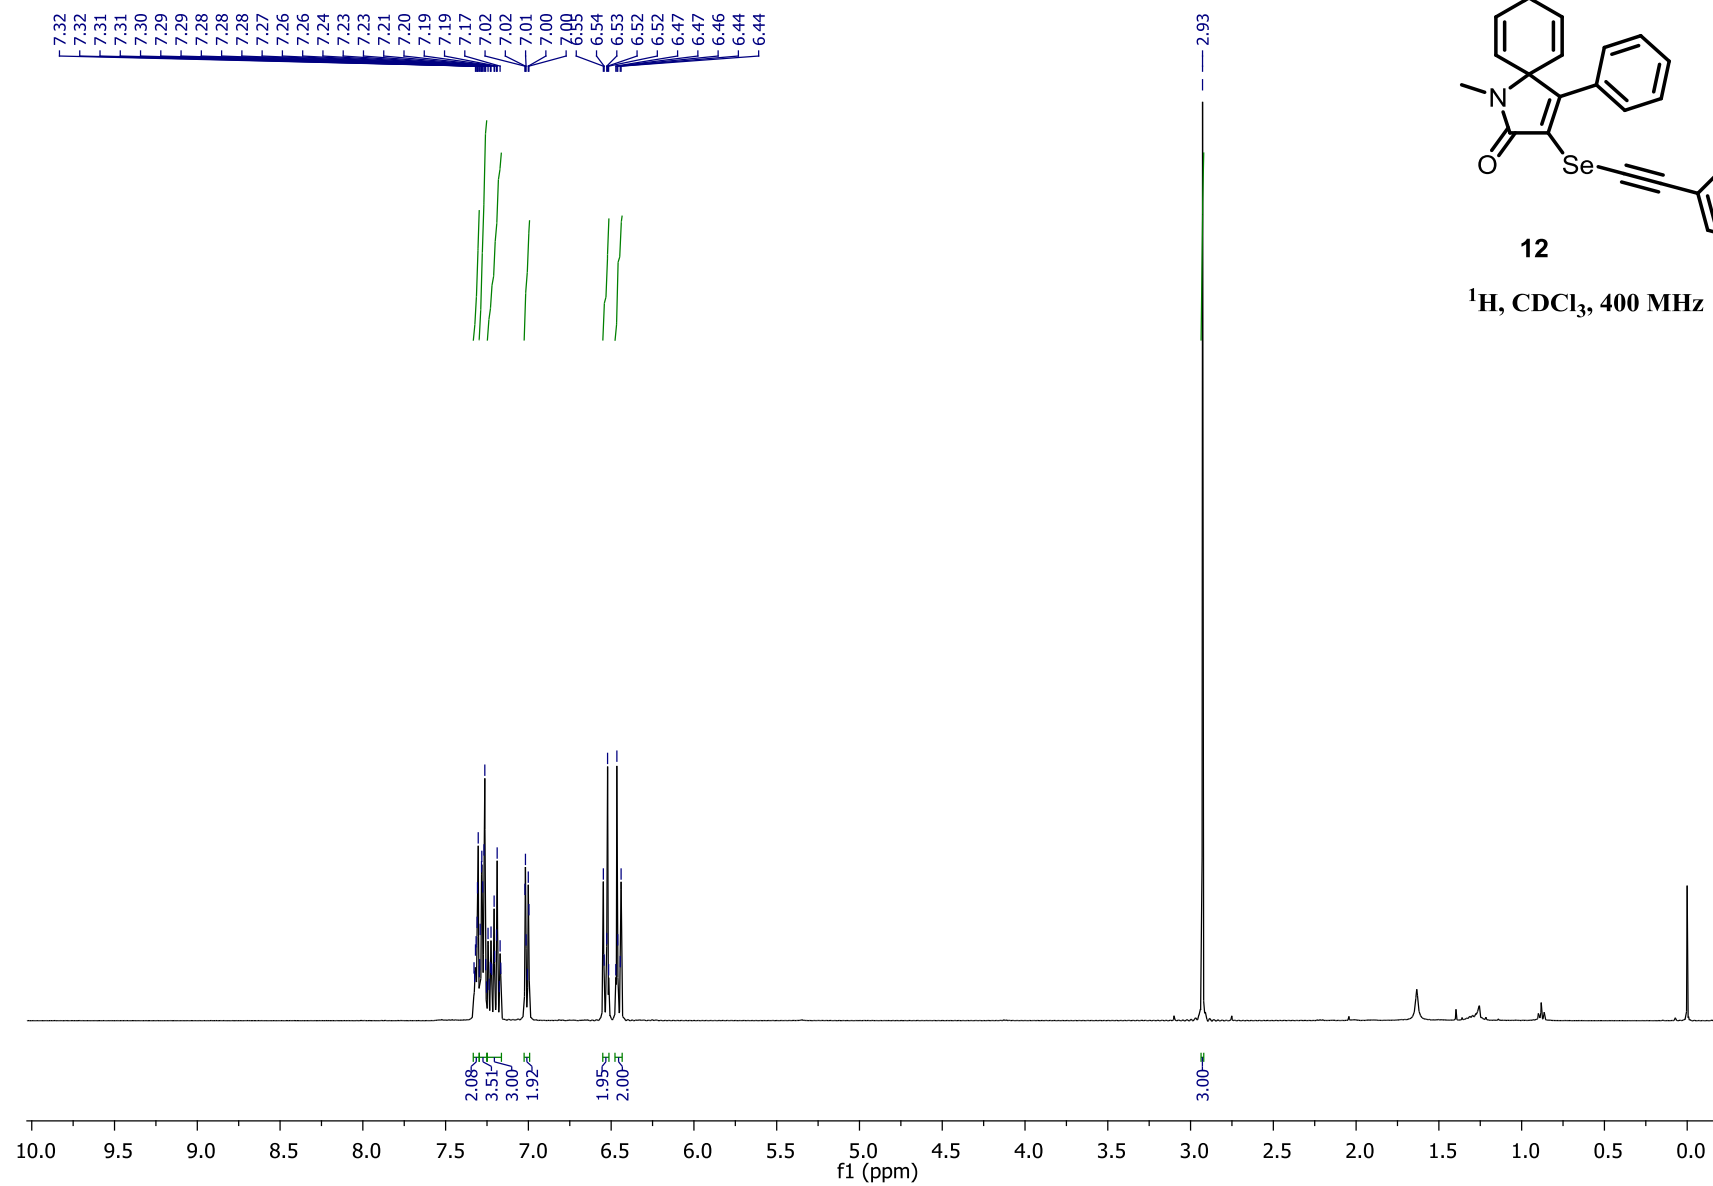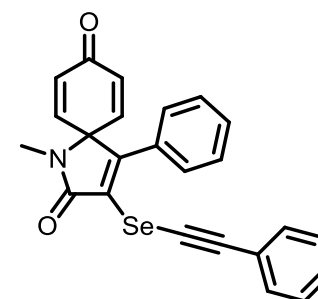

**12**

<sup>1</sup>H, CDCl<sub>3</sub>, 400 MHz

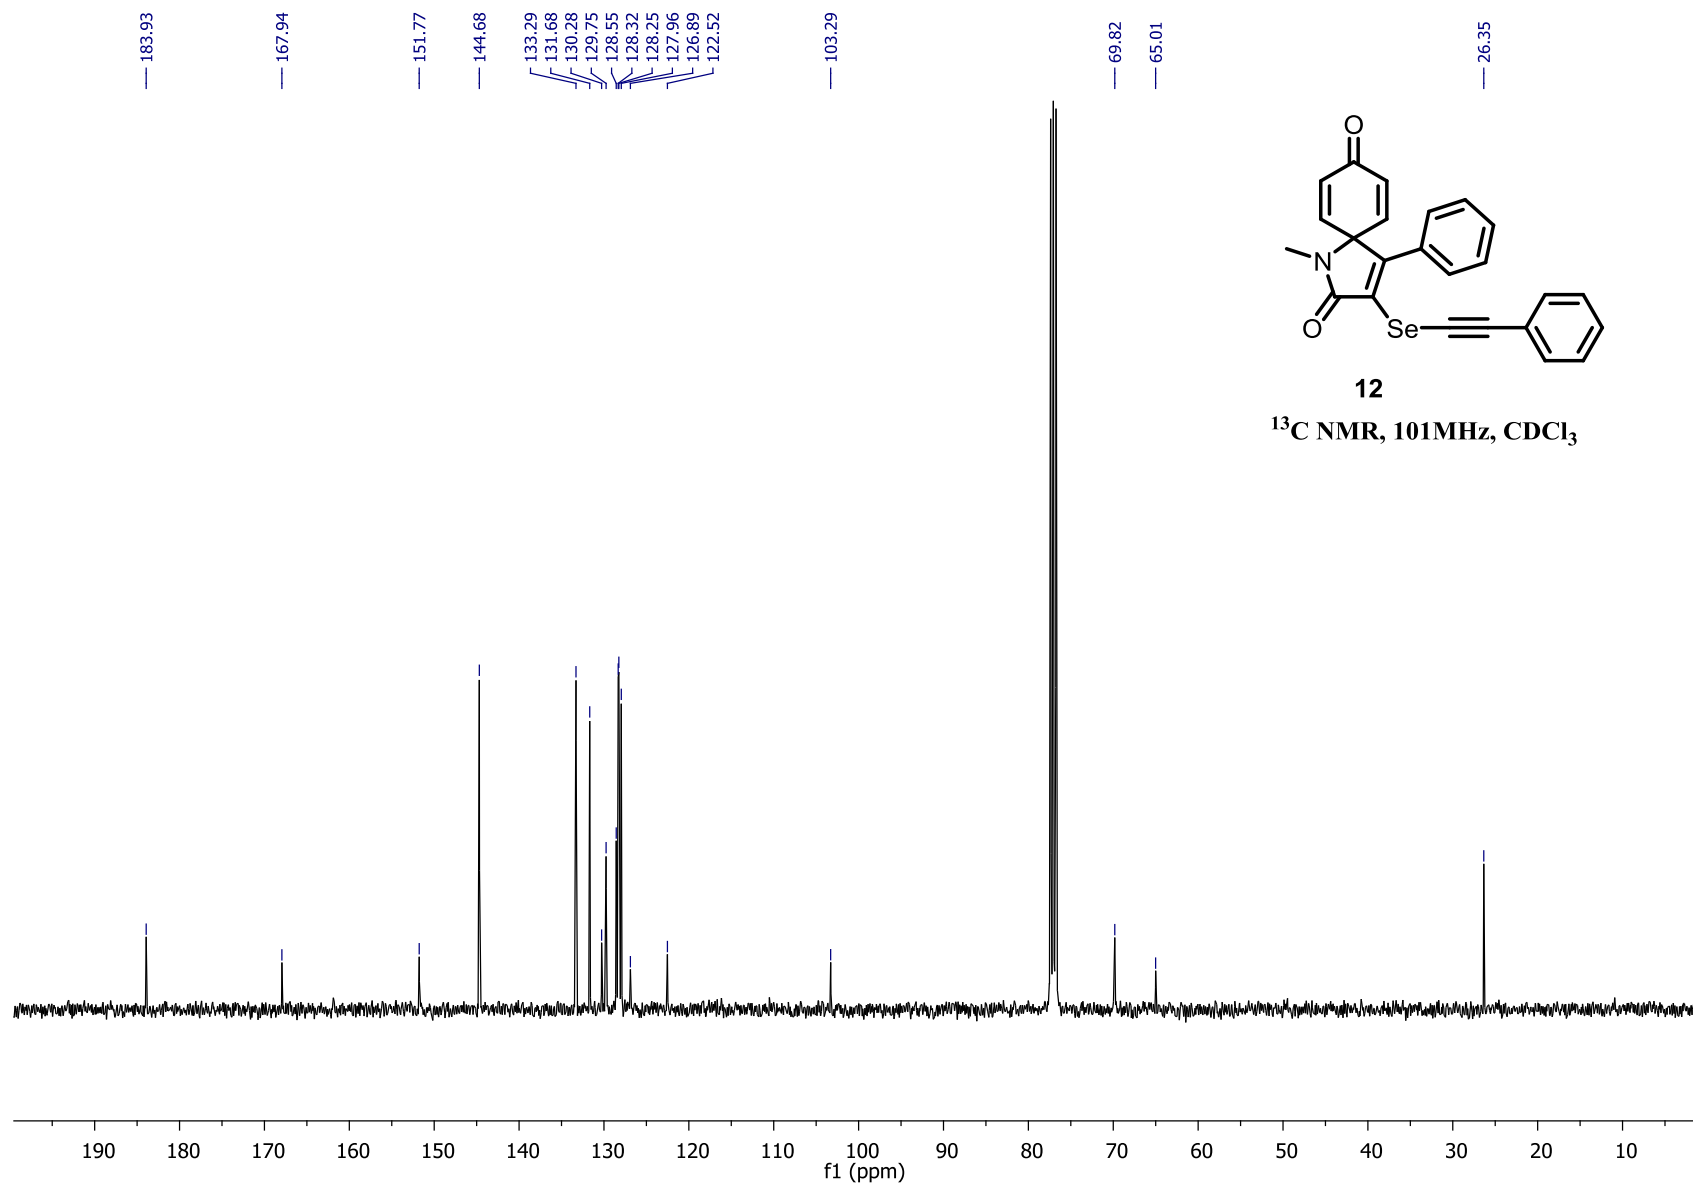

Supplement: Supplementary file 1 [file 25559795]
